# Supplementary material for: Adaptive aromaticity in 16-valence-electron metallazapentalenes
Source: Royal Society of Chemistry journal article supplement (doi:10.1039/d1dt03244e), 2021-01-01
Supplement: d1dt03244e1.pdf [file d1dt03244e1.pdf]

## Supporting Information

# Adaptive Aromaticity in 16-valence-electron Metallazapentalenes

Rulin Qiu, and Jun Zhu\*

State Key Laboratory of Physical Chemistry of Solid Surfaces, Fujian Provincial Key Laboratory of Theoretical and Computational Chemistry, Department of Chemistry, College of Chemistry and Chemical Engineering, Xiamen University, Xiamen 361005, People's Republic of China

E-mail: jun.zhu@xmu.edu.cn

## 1. 3D structures of hetero-metallapentalenes.

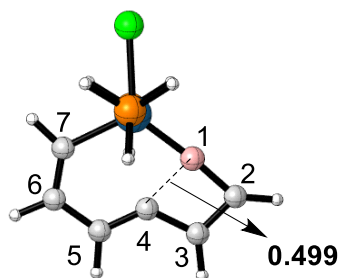

**Fig. S1.** Optimized structures of osmaborapentalene. Weak interaction between C4 and boron atom (WBI of B-C4 is 0.499).

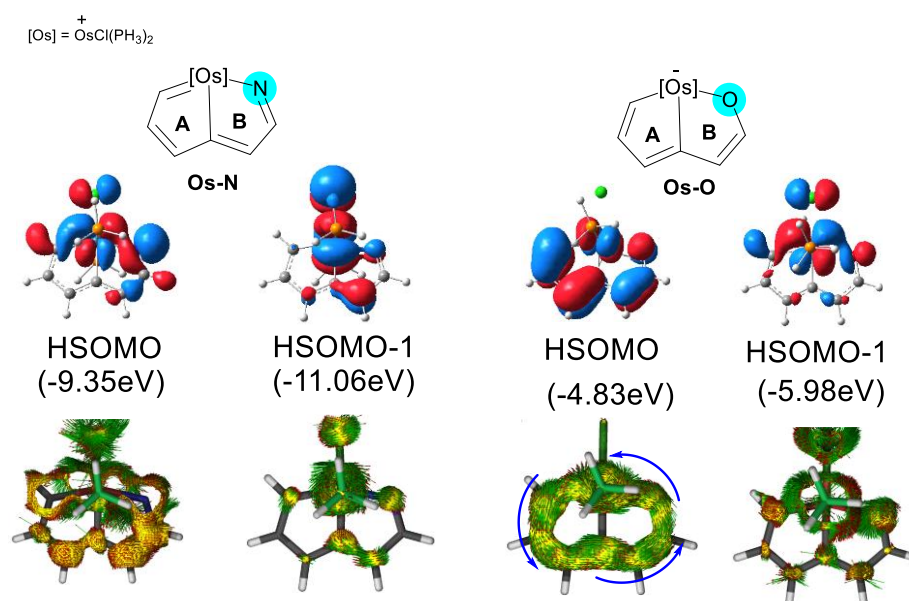

**Fig. S2.** Biorthogonalized SOMOs and the ACID plots of SOMOs of **Os-N** and **Os-O** in the  $T_1$  state. Isovalues for MO and ACID plots are 0.030 and 0.010 a.u., respectively. (For high-resolution ACID plots, see Fig. S17-S20)

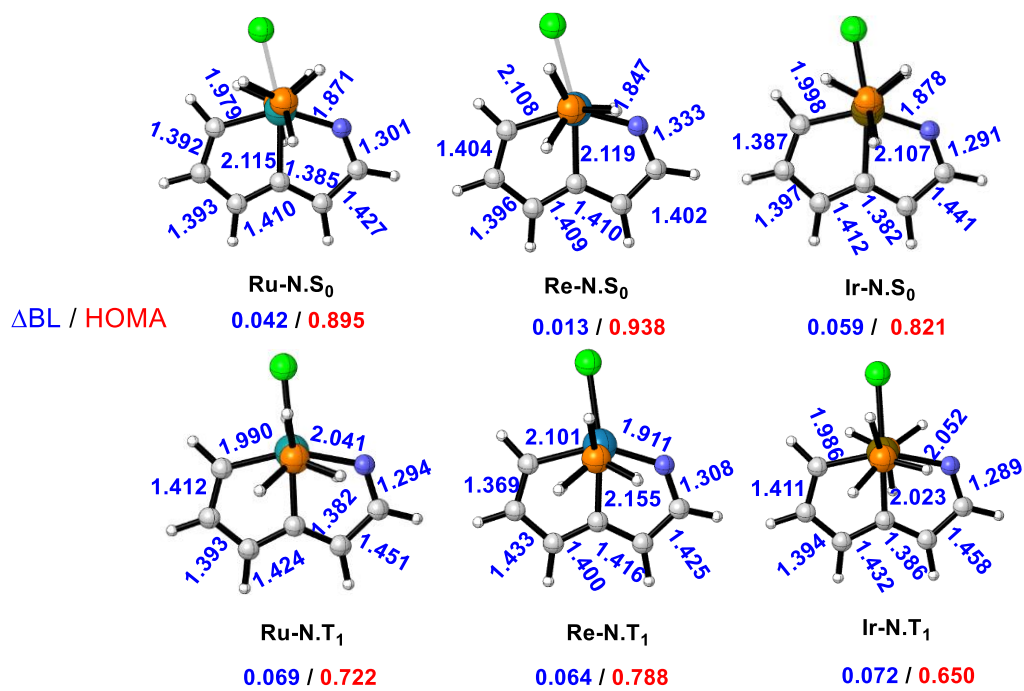

**Fig. S3.** Selected bond lengths (Å, blue) and HOMA values (red) in metallazapentalenes, the NICS(1)<sub>zz</sub> values of rings A and B are separated by the slash “/”.

## 2. Functional comparison

### 1) BLAs

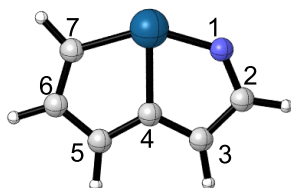

**Table S1.** BLAs of osmazapentalenes in the  $S_0$  state with B3LYP,  $\omega$ B97X, B3PW91, PBE0, and TPSS functionals. Bond length given in Å.

| Bonds of <b>Os-N.S<sub>0</sub></b> | B3LYP | $\omega$ B97X | B3PW91 | PBE0  | TPSS  |
|------------------------------------|-------|---------------|--------|-------|-------|
| Os-N                               | 1.850 | 1.834         | 1.839  | 1.833 | 1.854 |
| N-C2                               | 1.312 | 1.303         | 1.31   | 1.308 | 1.324 |
| C2-C3                              | 1.418 | 1.421         | 1.414  | 1.413 | 1.418 |
| C3-C4                              | 1.395 | 1.383         | 1.394  | 1.392 | 1.406 |
| C4-C5                              | 1.409 | 1.413         | 1.408  | 1.407 | 1.414 |
| C5-C6                              | 1.393 | 1.384         | 1.391  | 1.389 | 1.399 |
| C6-C7                              | 1.398 | 1.397         | 1.396  | 1.395 | 1.404 |
| Os-C7                              | 1.991 | 1.971         | 1.980  | 1.975 | 1.997 |
| Os-C4                              | 2.108 | 2.081         | 2.089  | 2.081 | 2.101 |
| BLAs                               | 0.025 | 0.038         | 0.023  | 0.024 | 0.019 |
| RD % <sup>a</sup>                  | 0     | 0.7%          | 0.3%   | 0.5%  | 0.4%  |

<sup>a</sup> Relative deviation (RD) = Average  $\Sigma[ (|BL_{B3LYP} - BL_{other\ functionals}|) / BL_{other\ functionals} ]$

**Table S2.** BLAs of osmazapentalenes in the  $T_1$  state with B3LYP,  $\omega$ B97X, B3PW91, PBE0, and TPSS functionals. Bond length given in Å.

| Bonds of Os-<br>N. $T_1$ | B3LYP | $\omega$ B97X | B3PW91 | PBE0  | TPSS  |
|--------------------------|-------|---------------|--------|-------|-------|
| Os-N                     | 1.997 | 1.992         | 1.978  | 1.973 | 1.979 |
| N-C2                     | 1.304 | 1.294         | 1.304  | 1.302 | 1.317 |
| C2-C3                    | 1.444 | 1.451         | 1.438  | 1.437 | 1.438 |
| C3-C4                    | 1.39  | 1.377         | 1.39   | 1.388 | 1.406 |
| C4-C5                    | 1.424 | 1.43          | 1.422  | 1.421 | 1.426 |
| C5-C6                    | 1.394 | 1.383         | 1.392  | 1.39  | 1.404 |
| C6-C7                    | 1.418 | 1.418         | 1.416  | 1.415 | 1.416 |
| Os-C7                    | 2.005 | 1.988         | 1.994  | 1.988 | 2.016 |
| Os-C4                    | 2.061 | 2.048         | 2.049  | 2.046 | 2.061 |
| BLAs                     | 0.054 | 0.074         | 0.048  | 0.049 | 0.034 |
| RD % <sup>a</sup>        | 0     | 0.6%          | 0.3%   | 0.5%  | 0.5%  |

<sup>a</sup> Relative deviation (RD) = Average  $\Sigma[(|BL_{B3LYP} - BL_{Other\ functionals}|)/BL_{Other\ functionals}]$

**Table S3.** BLAs of ruthenazapentalenes in the  $S_0$  state with B3LYP,  $\omega$ B97X, B3PW91, PBE0, and TPSS functionals. Bond length given in Å.

| Bonds of Ru-<br>N. $S_0$ | B3LYP | $\omega$ B97X | B3PW91 | PBE0  | TPSS  |
|--------------------------|-------|---------------|--------|-------|-------|
| Ru-N                     | 1.871 | 1.857         | 1.856  | 1.85  | 1.872 |
| N-C2                     | 1.301 | 1.291         | 1.299  | 1.297 | 1.313 |
| C2-C3                    | 1.427 | 1.433         | 1.422  | 1.422 | 1.425 |
| C3-C4                    | 1.385 | 1.372         | 1.385  | 1.383 | 1.398 |
| C4-C5                    | 1.41  | 1.416         | 1.408  | 1.407 | 1.413 |
| C5-C6                    | 1.393 | 1.383         | 1.39   | 1.389 | 1.4   |
| C6-C7                    | 1.392 | 1.392         | 1.391  | 1.39  | 1.397 |
| Ru-C7                    | 1.979 | 1.957         | 1.966  | 1.961 | 1.988 |
| Ru-C4                    | 2.115 | 2.083         | 2.093  | 2.084 | 2.108 |
| BLAs                     | 0.042 | 0.061         | 0.037  | 0.039 | 0.028 |
| RD % <sup>a</sup>        | 0     | 0.7%          | 0.4%   | 0.5%  | 0.4%  |

<sup>a</sup> Relative deviation (RD) = Average  $\Sigma[(|BL_{B3LYP} - BL_{Other\ functionals}|)/BL_{Other\ functionals}]$

**Table S4.** BLAs of ruthenazapentalenes in the  $T_1$  state with B3LYP,  $\omega$ B97X, B3PW91, PBE0, and TPSS functionals. Bond length given in Å.

| Bonds of <b>Ru-N.T<sub>1</sub></b> | B3LYP | $\omega$ B97X | B3PW91 | PBE0  | TPSS  |
|------------------------------------|-------|---------------|--------|-------|-------|
| Ru-N                               | 2.041 | 2.051         | 2.014  | 2.01  | 2.017 |
| N-C2                               | 1.294 | 1.284         | 1.294  | 1.292 | 1.309 |
| C2-C3                              | 1.451 | 1.459         | 1.444  | 1.444 | 1.445 |
| C3-C4                              | 1.382 | 1.369         | 1.382  | 1.38  | 1.396 |
| C4-C5                              | 1.424 | 1.433         | 1.421  | 1.421 | 1.425 |
| C5-C6                              | 1.393 | 1.381         | 1.391  | 1.389 | 1.401 |
| C6-C7                              | 1.412 | 1.415         | 1.411  | 1.41  | 1.417 |
| Ru-C7                              | 1.99  | 1.963         | 1.977  | 1.97  | 1.999 |
| Ru-C4                              | 2.066 | 2.049         | 2.053  | 2.049 | 2.065 |
| BLAs                               | 0.069 | 0.09          | 0.062  | 0.064 | 0.049 |
| RD % <sup>a</sup>                  | 0     | 0.7%          | 0.4%   | 0.5%  | 0.6%  |

<sup>a</sup> Relative deviation (RD) = Average  $\Sigma[(|BL_{B3LYP} - BL_{Other\ functional}|)/BL_{Other\ functional}]$

## 2) NICS(1)<sub>zz</sub> comparison

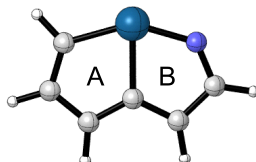

**Table S5.** NICS(1)<sub>zz</sub> values (in ppm) for rings A and B in metallazapentalenes with B3LYP,  $\omega$ B97X, B3PW91, PBE0, and TPSS functionals.

| Functional                | B3LYP       | $\omega$ B97X | B3PW91      | PBE0        | TPSS        |
|---------------------------|-------------|---------------|-------------|-------------|-------------|
| <b>Os-N.S<sub>0</sub></b> | -23.3/-25.1 | -23.5/-25.8   | -23.8/-25.3 | -24.3/-25.9 | -22.9/-24.3 |
| <b>Os-N.T<sub>1</sub></b> | -22.1/-21.5 | -20.8/-20.6   | -23.0/-22.9 | -23.6/-23.8 | -20.0/-19.1 |
| <b>Ru-N.S<sub>0</sub></b> | -19.6/-20.2 | -18.8/-19.1   | -20.0/-20.7 | -20.3/-20.9 | -19.4/-20.3 |
| <b>Ru-N.T<sub>1</sub></b> | -19.0/-17.9 | -16.6/-15.5   | -20.2/-19.6 | -20.7/-20.2 | -20.5/-20.3 |

### 3. $\Delta E_{ST}^a$ values (kcal mol<sup>-1</sup>) of metallazapentalenes.

**Table S6.**  $\Delta E_{ST}$  values (kcal mol<sup>-1</sup>) of metallazapentalenes.

| $\Delta E_{ST}$ (kcal/mol)  |                            |                            |                            |                              |                             |                |
|-----------------------------|----------------------------|----------------------------|----------------------------|------------------------------|-----------------------------|----------------|
| <b>Os-N</b>                 | <b>Ru-N</b>                | <b>Re-N</b>                | <b>Ir-N</b>                | <b>Os-N.SnCl<sub>3</sub></b> | <b>Os-N.BMe<sub>2</sub></b> | <b>Os-N.H</b>  |
| 35.9                        | 29.9                       | 31.4                       | 26.9                       | 28.3                         | 27.4                        | 30.9           |
| <b>Os-N.PMe<sub>3</sub></b> | <b>Os-N.H<sub>2</sub>O</b> | <b>Os-N.NH<sub>3</sub></b> | <b>Os-N.NH<sub>2</sub></b> | <b>Os-N.I</b>                | <b>Os-N.OH</b>              | <b>Os-N.Br</b> |
| 35.0                        | 36.3                       | 38.4                       | 30.9                       | 30.8                         | 36.0                        | 34.2           |
| <b>Os-N.F</b>               | <b>Os-N.CO</b>             | <b>Os-N.PF<sub>3</sub></b> | <b>Os-N.iso1</b>           | <b>Os-N.iso2</b>             | <b>Os-O</b>                 |                |
| 39.6                        | 35.0                       | 36.5                       | 29.4                       | 27.6                         | 1.1                         |                |

<sup>a</sup>  $\Delta E_{ST} = E_{T1} - E_{S0}$

#### 4. Signed modulus density plots of GIMIC for metazallapentalenes.

##### a) Singlet states

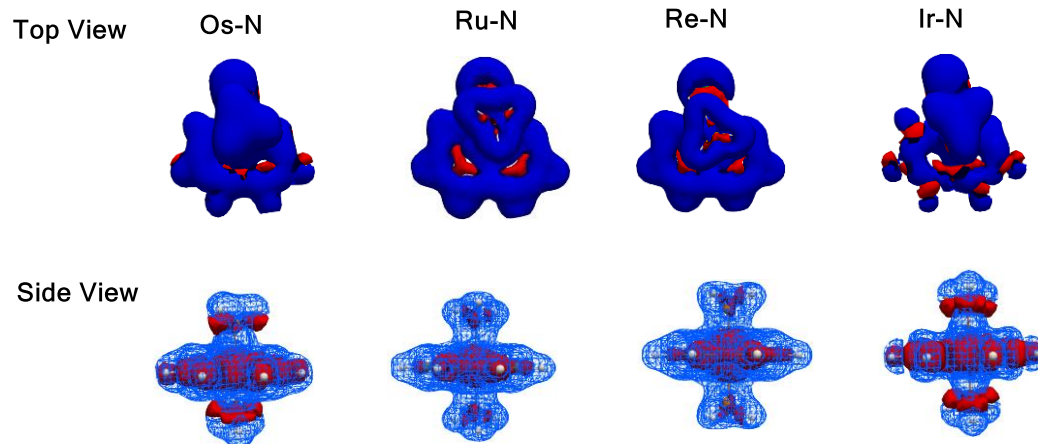

##### b) Triplet states

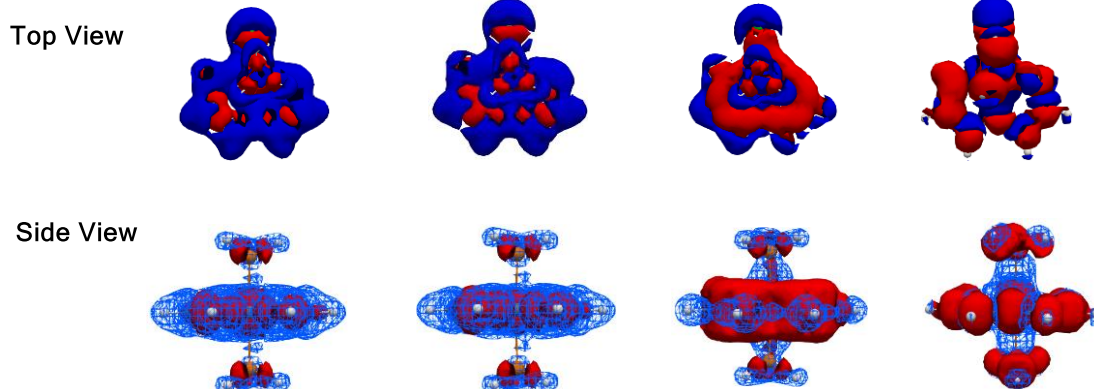

**Fig. S4.** Signed modulus density plots of GIMIC (isovalue: 0.015) for metazallapentalenes. Blue-solid and blue-wireframe density surfaces representing the same diatropic contributions are presented in top and side views, respectively. Red density surfaces correspond to paratropic contributions.



## 5 EDDB analysis of metallazapentalenes.

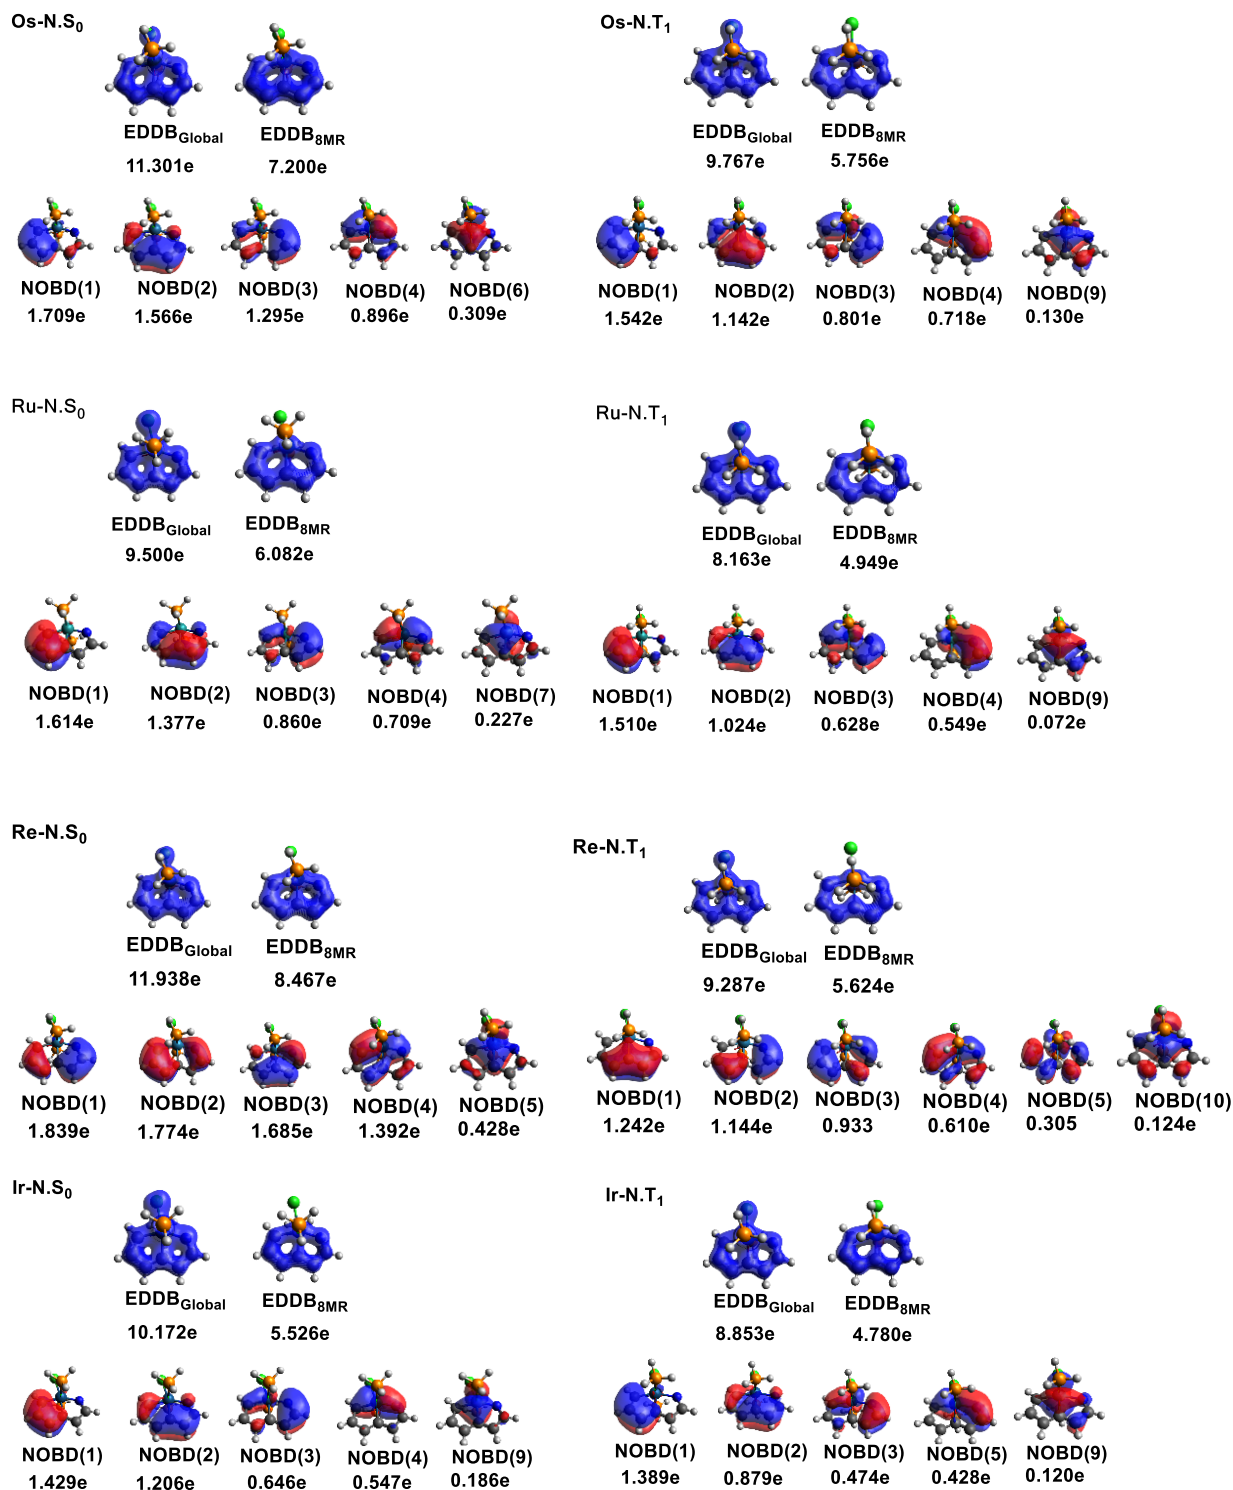

Fig. S5.  $\pi$ -EDDB analysis of metallazapentalenes . (Isovalue: 0.01 a.u.)

## 6. Spin density of osmazapentalenes with different ligands.

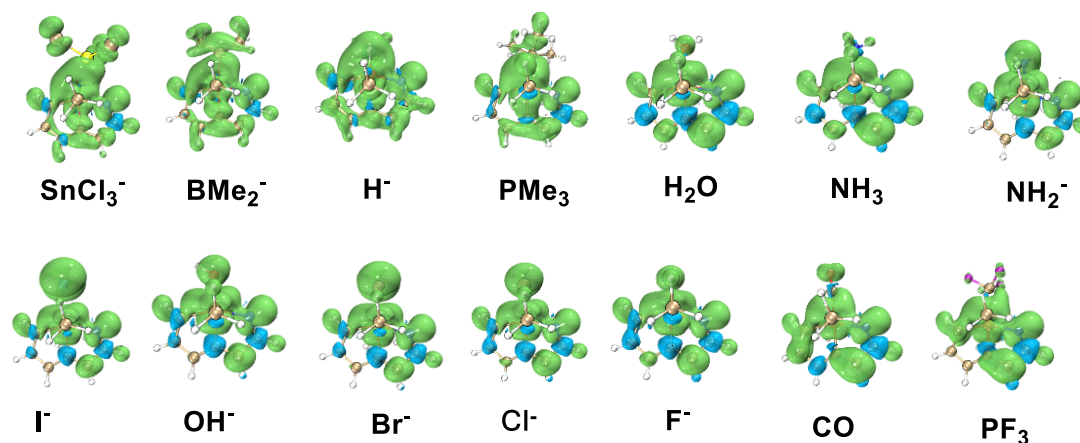

Fig. S6. Spin density analysis (isovalue 0.001 a.u.) for osmazapentalenes with different ligands.

## 7. The aromaticity of osmazapentalenes with the nitrogen atom at the meta and para positions.

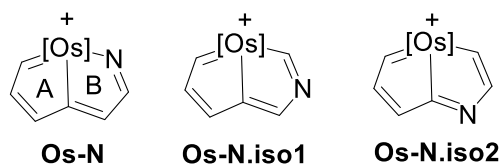

Table S7. NICS(1)<sub>zz</sub> values (ppm) for rings A / B and relative electronic energy values ( $\Delta E$ , kcal/mol) in metallazapentalenes for the  $S_0$  and  $T_1$  states. [Os] = OsCl(PH<sub>3</sub>)<sub>2</sub>

| Compounds             |       | Os-N        | Os-N.iso1   | Os-N.iso2   |
|-----------------------|-------|-------------|-------------|-------------|
| NICS(1) <sub>zz</sub> | $S_0$ | -23.3/-25.1 | -21.0/-23.1 | -20.7/-27.7 |
|                       | $T_1$ | -22.1/-21.5 | -16.5/-20.3 | -22.1/-23.9 |
| $\Delta E$            | $S_0$ | 0           | 15.4        | 20.3        |
|                       | $T_1$ | 35.9        | 44.8        | 47.9        |

## 8. Aromaticity comparison of simplified and experimental models of metallazapentalenes on the different level theory.

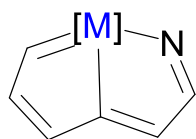

M = Os<sup>+</sup>, Ru<sup>+</sup>, Re, Ir<sup>2+</sup>

**Table S8.** The NICS(1)<sub>zz</sub> values (ppm) for rings A and B in metallazapentalenes. Level of theory: (U)B3LYP/def2-TZVP.

| S <sub>0</sub>                            |             |             |             |             |
|-------------------------------------------|-------------|-------------|-------------|-------------|
| [M] = MCl(PH <sub>3</sub> ) <sub>2</sub>  | -23.3/-25.1 | -19.6/-20.2 | -24.3/-25.5 | -17.8/-17.2 |
| [M] = MCl(PMe <sub>3</sub> ) <sub>2</sub> | -22.3/-27.2 | -19.6/-23.0 | -20.9/-26.1 | -17.2/-19.9 |
| [M] = MCl(PPh <sub>3</sub> ) <sub>2</sub> | -25.3/-27.6 | -22.6/-24.1 | -23.1/-26.1 | -19.7/-20.5 |
| T <sub>1</sub>                            |             |             |             |             |
| [M] = MCl(PH <sub>3</sub> ) <sub>2</sub>  | -22.1/-21.5 | -19.0/-17.9 | -1.0/5.4    | -11.6/-12.2 |
| [M] = MCl(PMe <sub>3</sub> ) <sub>2</sub> | -22.6/-22.0 | -18.7/-18.2 | -4.9/2.1    | -13.8/-16.2 |
| [M] = MCl(PPh <sub>3</sub> ) <sub>2</sub> | -27.4/-22.0 | -23.8/-17.9 | -18.4/-10.8 | -18.4/-23.0 |

**Table S9.** The NICS(1)<sub>zz</sub> values (ppm) for rings A and B in metallazapentalenes. Level of theory: (U)B3LYP/6-31+G(d)~LanL2DZ.

| S <sub>0</sub>                            |             |             |             |             |
|-------------------------------------------|-------------|-------------|-------------|-------------|
| [M] = MCl(PH <sub>3</sub> ) <sub>2</sub>  | -23.1/-24.7 | -18.7/-19.1 | -23.7/-25.4 | -16.9/-16.4 |
| [M] = MCl(PMe <sub>3</sub> ) <sub>2</sub> | -21.8/-27.0 | -18.5/-22.0 | -20.6/-26.3 | -16.2/-19.1 |
| [M] = MCl(PPh <sub>3</sub> ) <sub>2</sub> | -25.0/-27.5 | -21.8/-23.3 | -22.9/-26.5 | -18.9/-19.8 |

| $T_1$                              |             |             |             |             |
|------------------------------------|-------------|-------------|-------------|-------------|
| $[M] = \text{MCl}(\text{PH}_3)_2$  | -20.9/-20.5 | -17.8/-17.0 | -1.0/5.1    | -10.6/-11.2 |
| $[M] = \text{MCl}(\text{PMe}_3)_2$ | -21.3/-20.9 | -17.0/-16.9 | -4.5/2.4    | -12.7/-15.6 |
| $[M] = \text{MCl}(\text{PPh}_3)_2$ | -26.5/-20.9 | -22.3/-16.7 | -21.4/-14.9 | -18.0/-22.6 |

**Table S10.** The NICS(1)zz values (ppm) for rings A and B in hetero-metallapentalenes.  $[M] = \text{MCl}(\text{PH}_3)_2$ . Level of theory: (U)B3LYP/6-31+G(d)~LanL2DZ.

| NICS(1)zz        |             |             |            |          |
|------------------|-------------|-------------|------------|----------|
|                  | $S_0$       | $T_1$       | $S_0$      | $T_1$    |
| $\text{Ru}^+$    | -18.7/-19.1 | -17.8/-17.0 | -1.1/-12.2 | 0.1/-4.5 |
| $\text{Os}^+$    | -23.1/-24.7 | -20.9/-20.5 | -1.8/-14.4 | 1.9/-5.2 |
| Re               | -23.7/-25.4 | -1.0/5.1    | -5.2/-11.1 | 7.0/-4.0 |
| $\text{Ir}^{2+}$ | -16.9/-16.4 | -10.6/-11.2 | -0.1/-11.3 | 0.4/-2.7 |

**Table S11** EDDB analysis for metallazapentalenes (unit: e). Level of theory: (U)B3LYP/6-31+G(d)~LanL2DZ.

| Species                   | EDDB <sub>Global</sub> | EDDB <sub>8MR</sub> | $\pi$ -EDDB <sub>8MR</sub> | $\pi$ -EDDB <sub>8MR}(\alpha)</sub> | $\pi$ -EDDB <sub>8MR}(\beta)</sub> |
|---------------------------|------------------------|---------------------|----------------------------|-------------------------------------|------------------------------------|
| <b>Os-N.S<sub>0</sub></b> | 10.182                 | 7.023               | 5.743                      | /                                   | /                                  |
| <b>Os-N.T<sub>1</sub></b> | 8.510                  | 5.553               | 4.337                      | 2.150                               | 2.187                              |
| <b>Ru-N.S<sub>0</sub></b> | 9.513                  | 6.053               | 4.684                      | /                                   | /                                  |
| <b>Ru-N.T<sub>1</sub></b> | 8.155                  | 4.983               | 3.373                      | 1.760                               | 1.977                              |
| <b>Re-N.S<sub>0</sub></b> | 11.401                 | 8.421               | 7.114                      | /                                   | /                                  |
| <b>Re-N.T<sub>1</sub></b> | 8.557                  | 5.526               | 4.304                      | 1.850                               | 2.454                              |
| <b>Ir-N.S<sub>0</sub></b> | 9.012                  | 5.276               | 3.932                      | /                                   | /                                  |
| <b>Ir-N.T<sub>1</sub></b> | 7.975                  | 4.427               | 3.104                      | 1.555                               | 1.585                              |

## 9. ACID plots of hetero-metallapentalenes

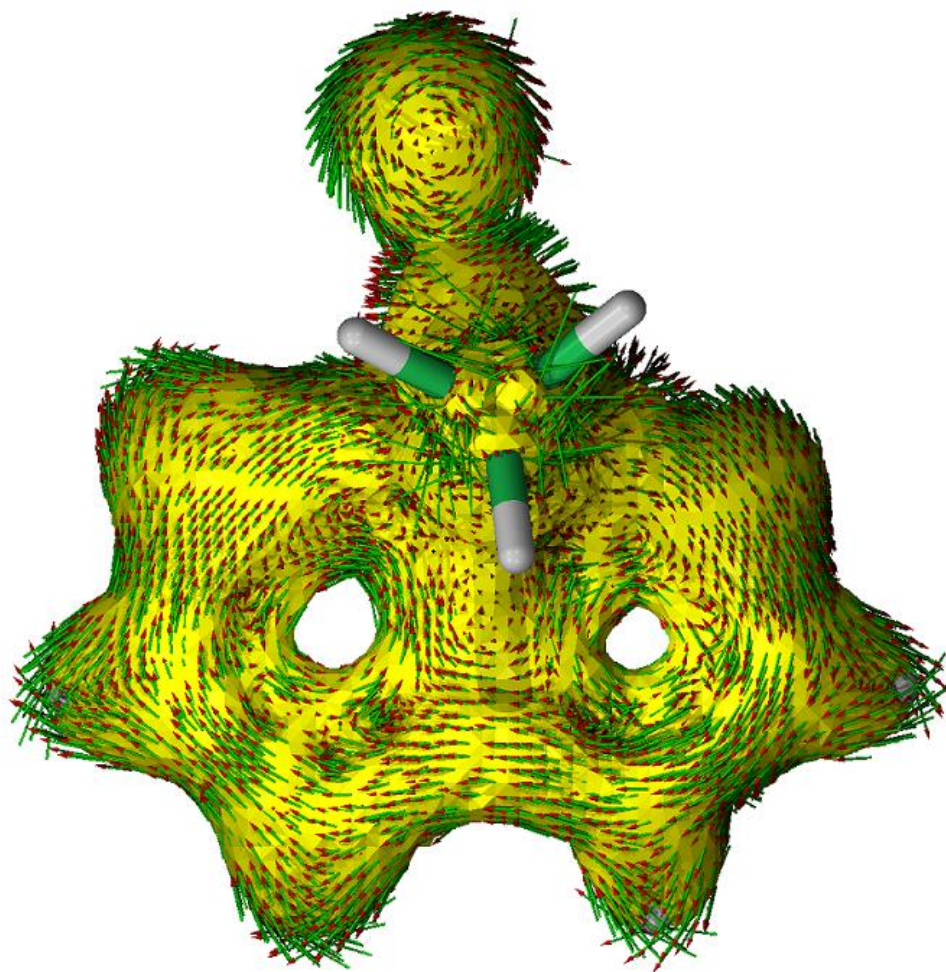

**Fig. S7.** ACID plot of **Os-N.S<sub>0</sub>**. Isovalue for ACID is 0.030 a.u.

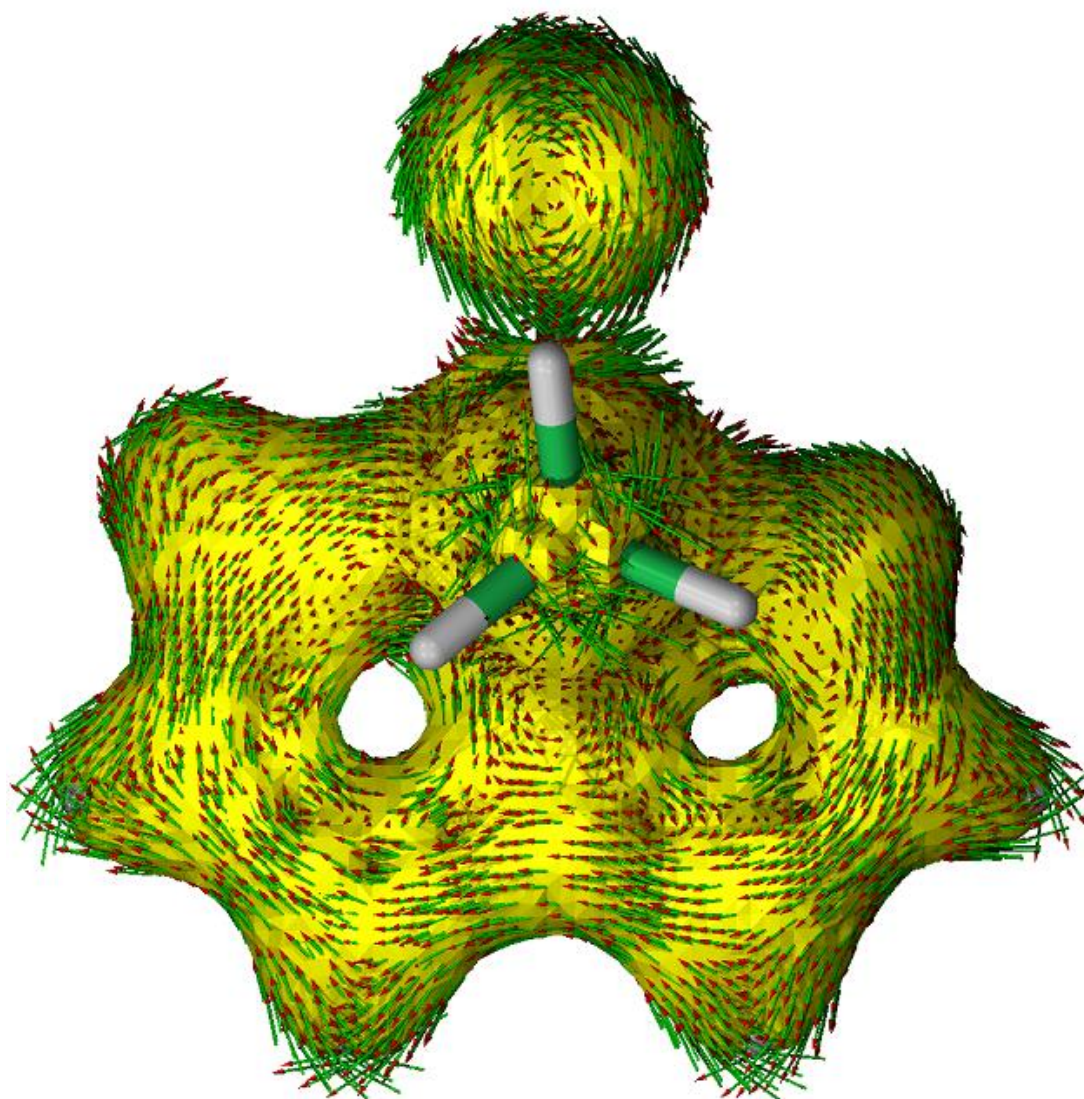

**Fig. S8.** ACID plot of **Os-N.T<sub>1</sub>**. Isovalue for ACID is 0.030 a.u.

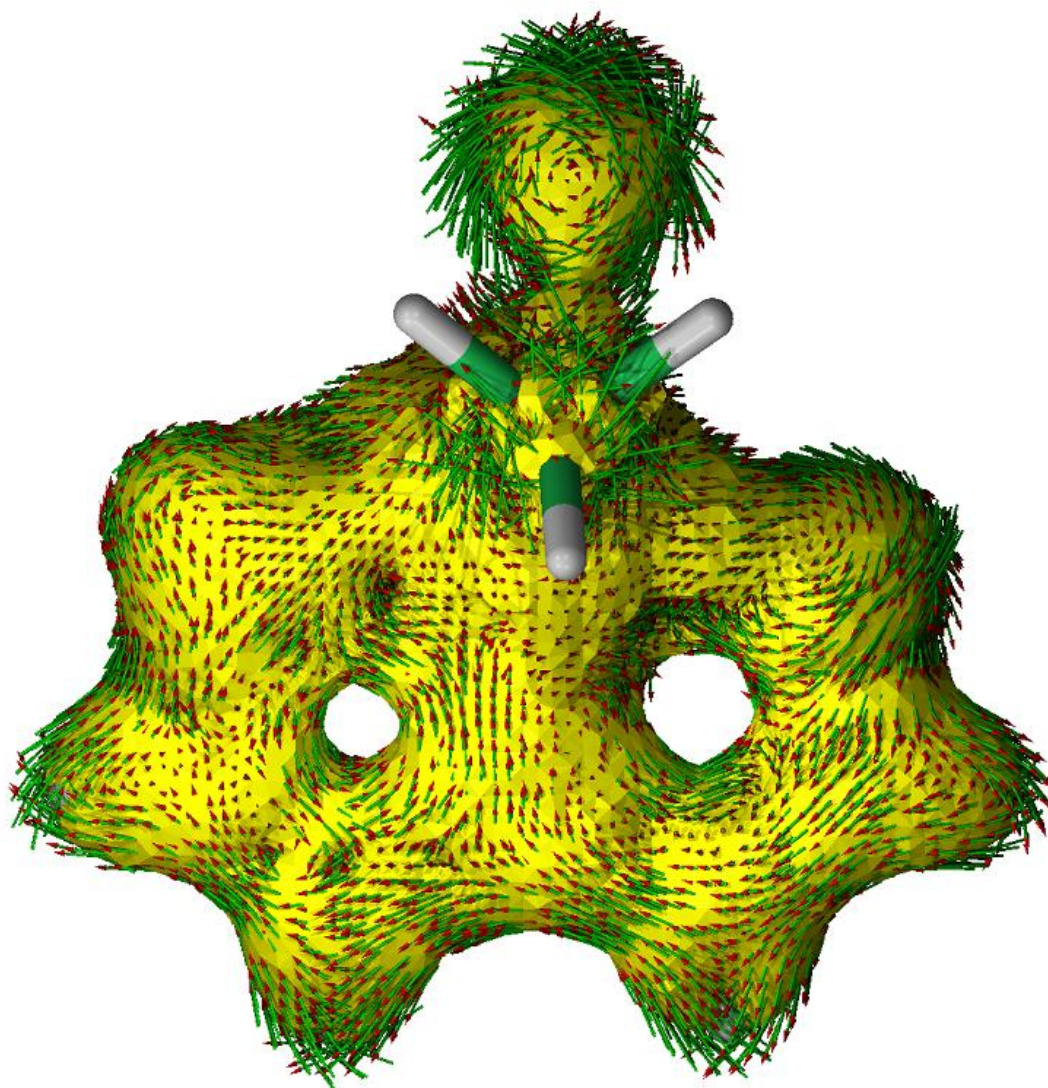

**Fig. S9.** ACID plot of **Os-O.S<sub>0</sub>**. Isovalue for ACID is 0.030 a.u.

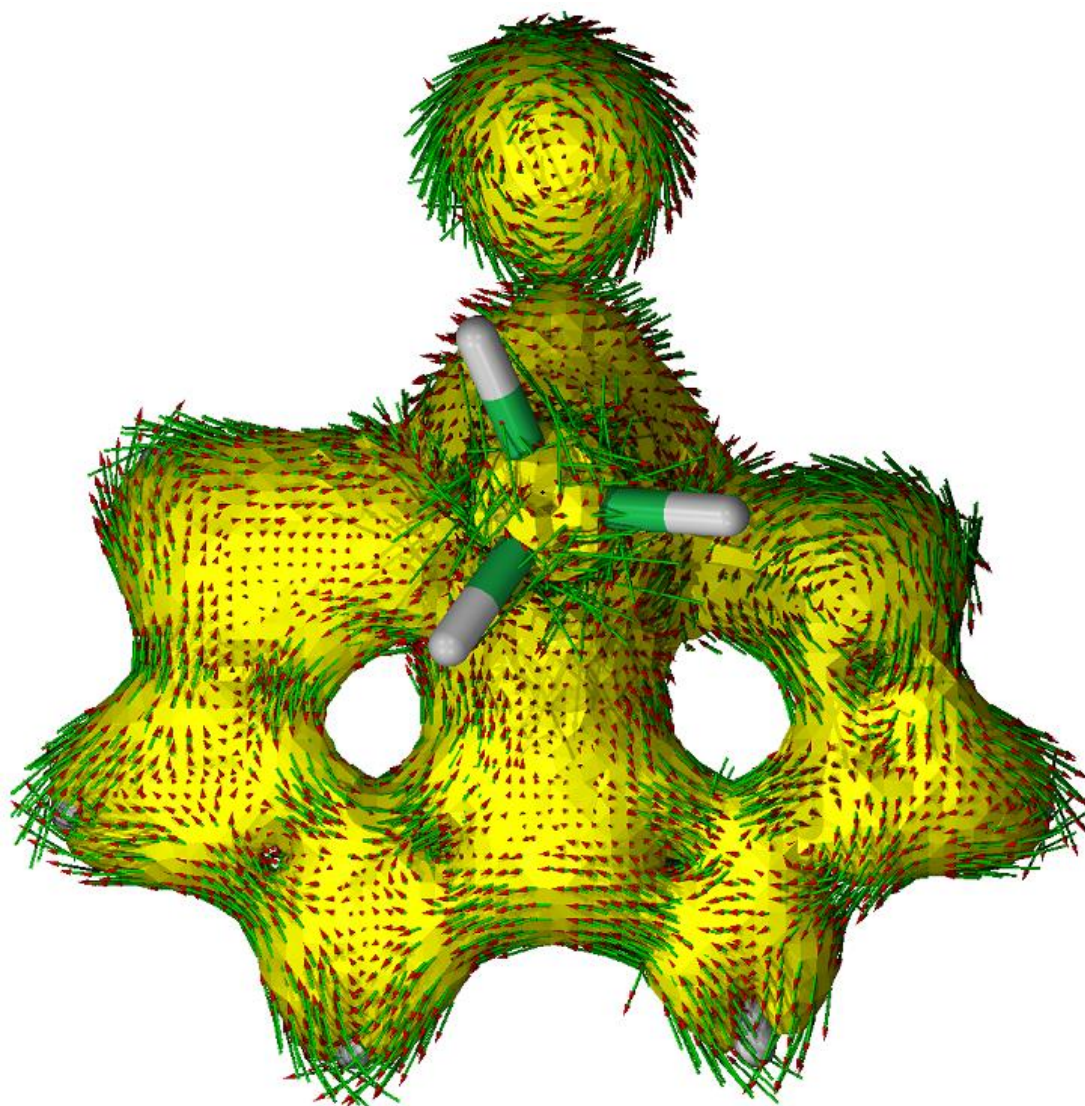

**Fig. S10.** ACID plot of **Os-O.T<sub>1</sub>**. Isovalue for ACID is 0.030 a.u.



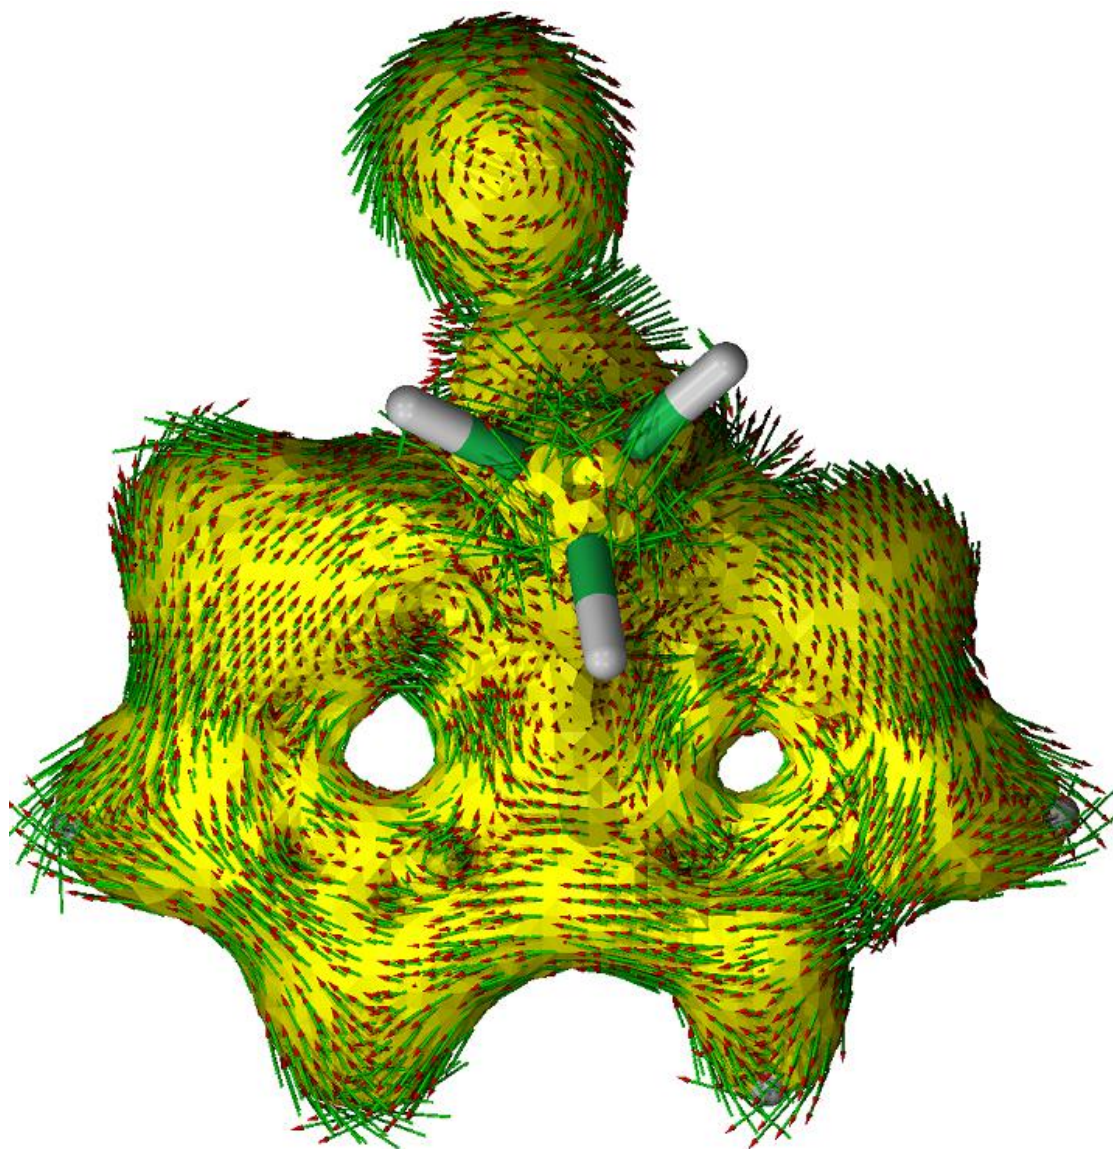

**Fig. S11.** ACID plot of **Ru-N.S<sub>0</sub>**. Isovalue for ACID is 0.030 a.u.

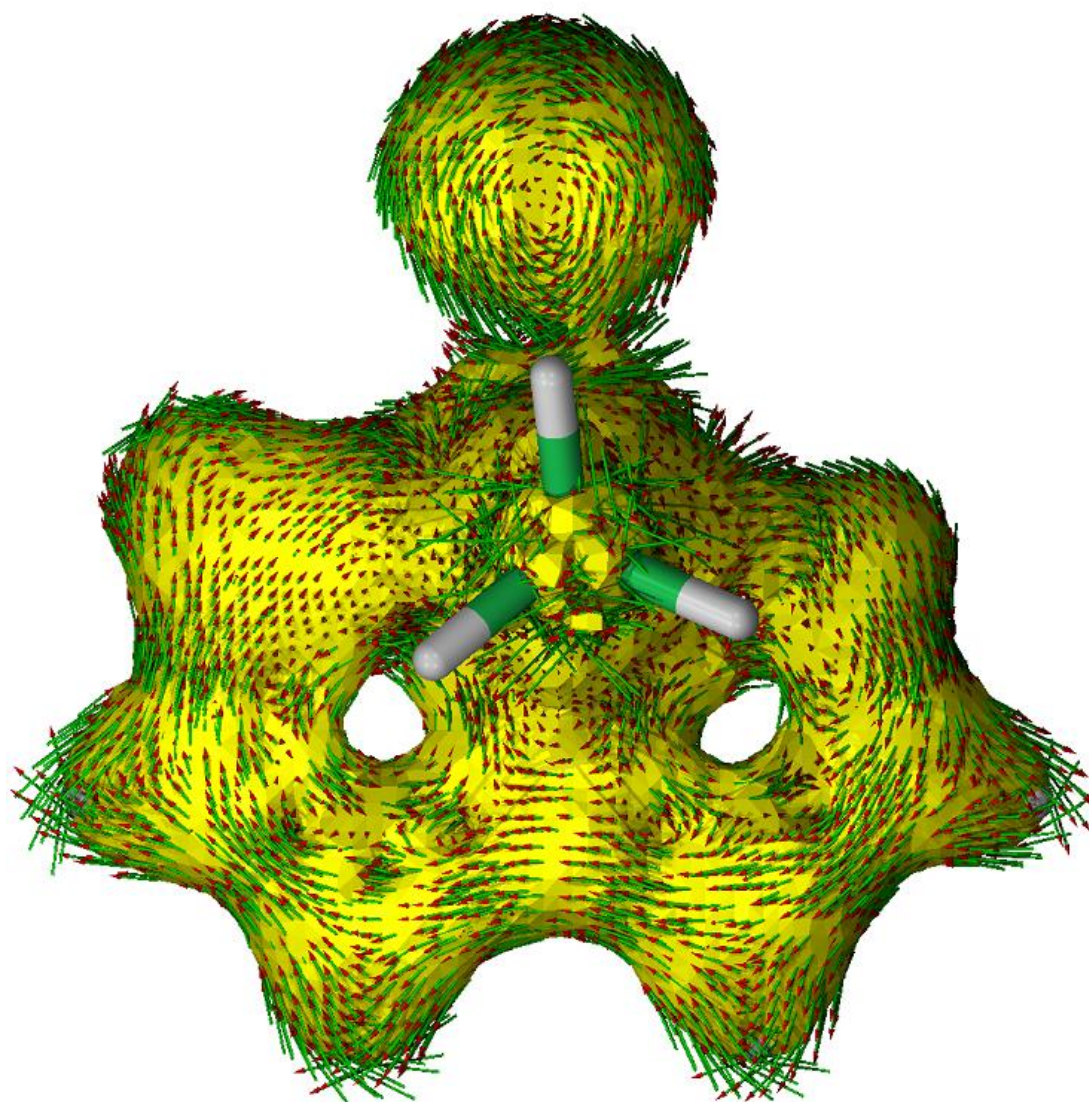

**Fig. S12.** ACID plot of **Ru-N.T<sub>1</sub>**. Isovalue for ACID is 0.030 a.u.

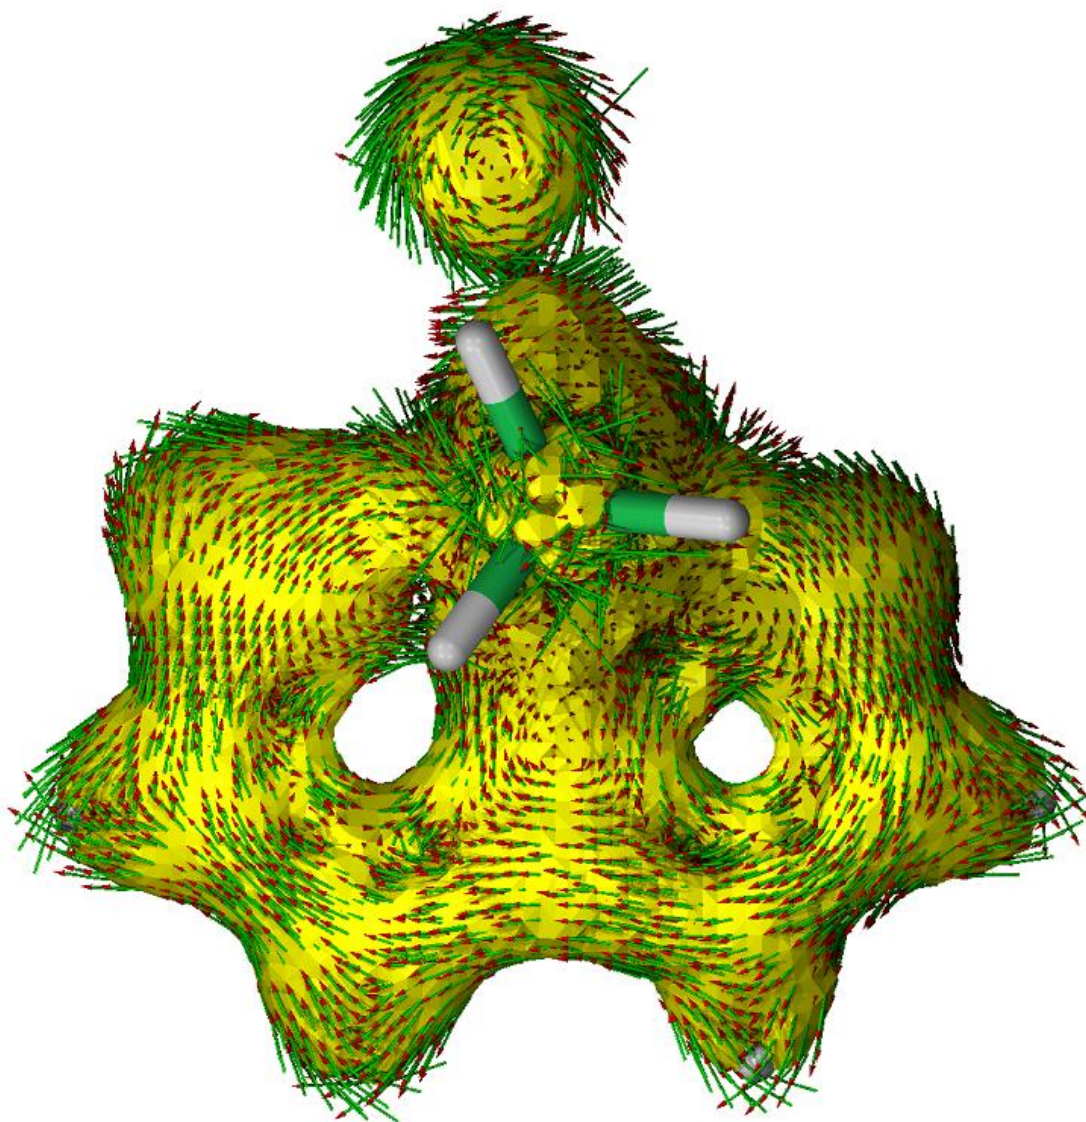

**Fig. S13.** ACID plot of **Re-N.S<sub>0</sub>**. Isovalue for ACID is 0.030 a.u.

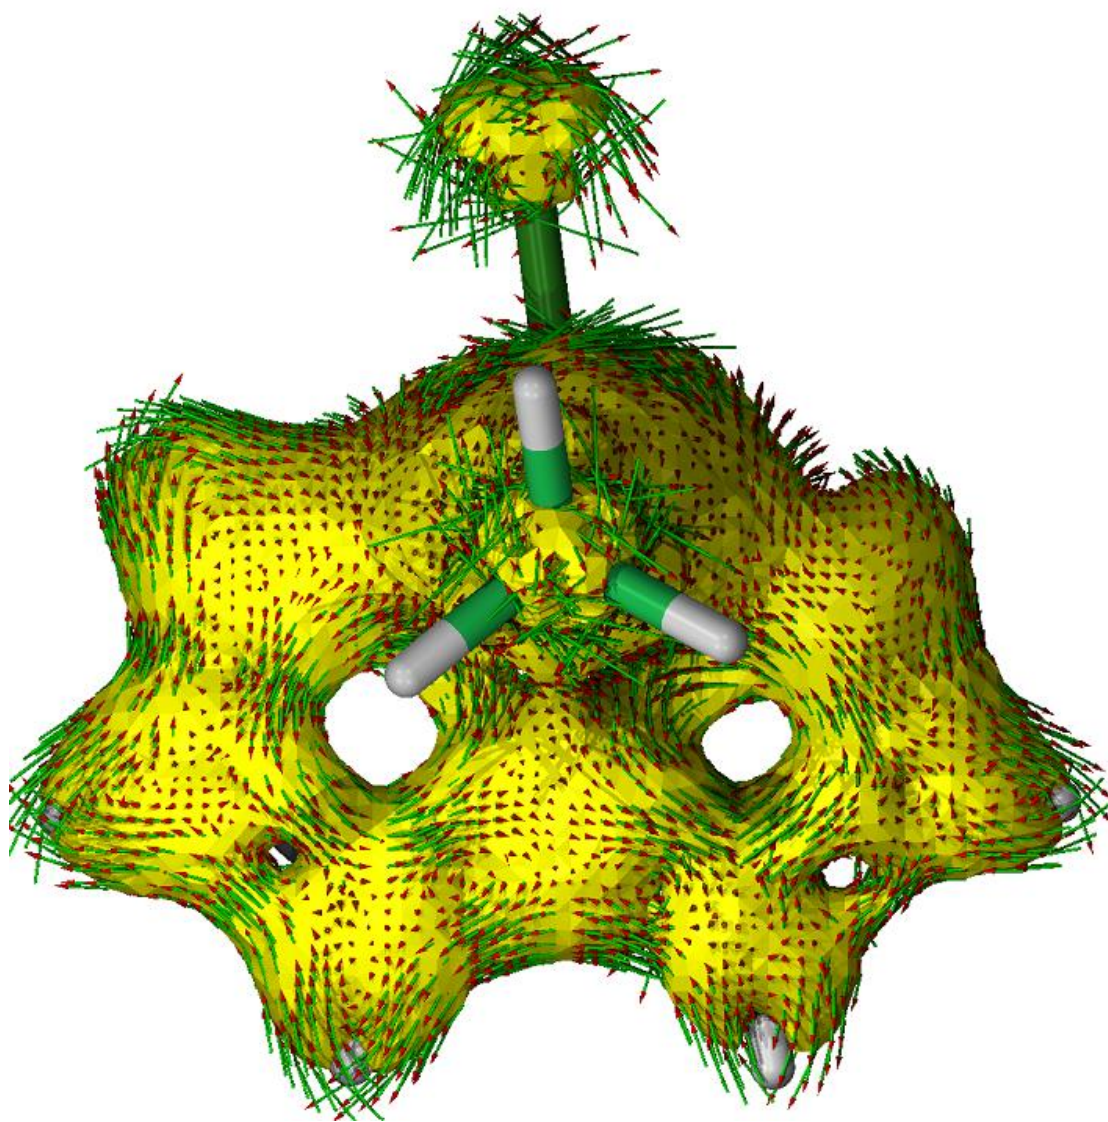

**Fig. S14.** ACID plot of **Re-N.T<sub>1</sub>**. Isovalue for ACID is 0.030 a.u.

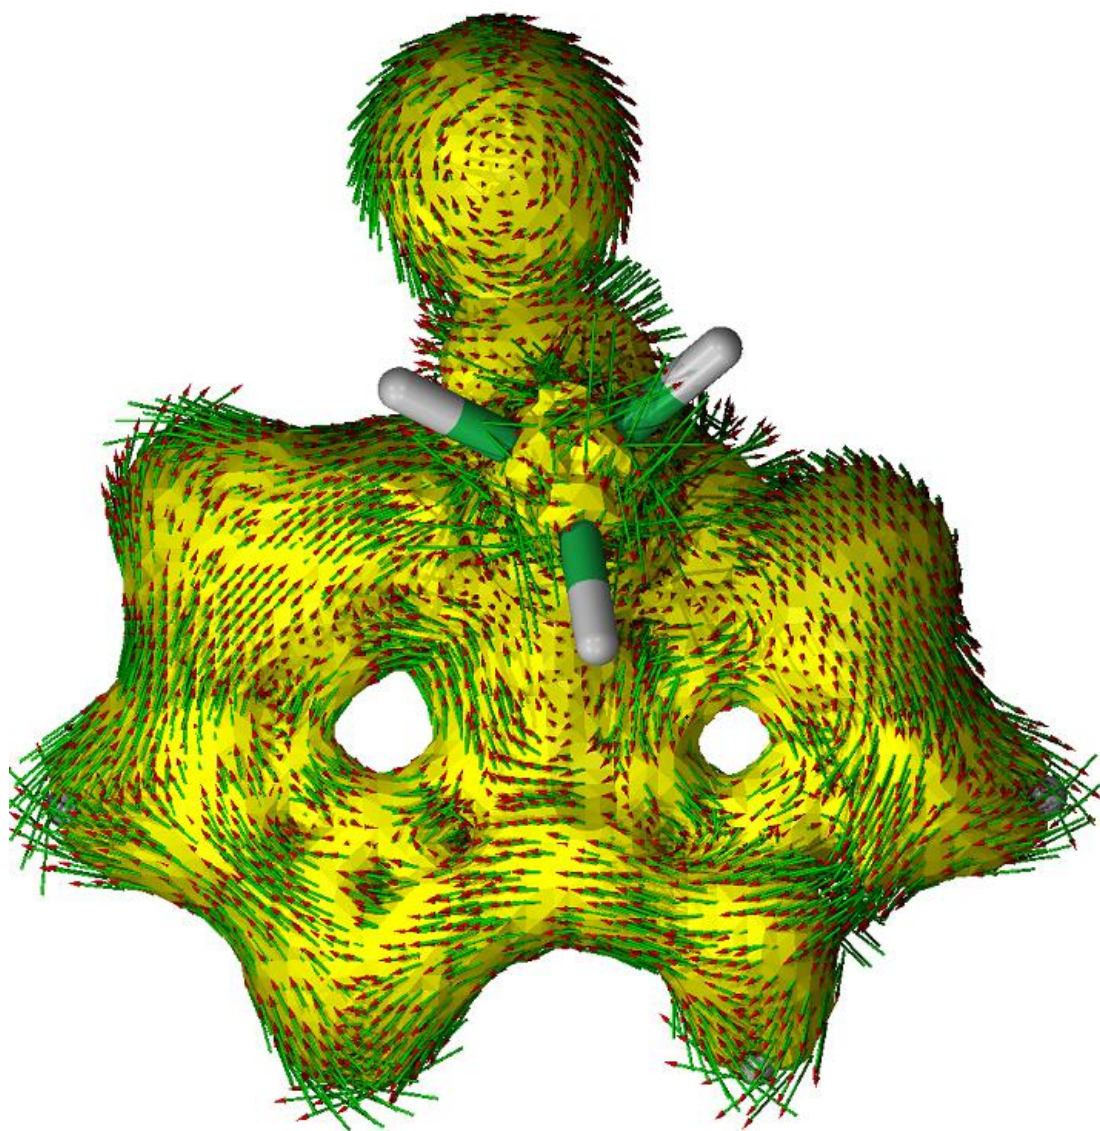

**Fig. S15.** ACID plot of Ir-N.S<sub>0</sub>. Isovalue for ACID is 0.030 a.u.

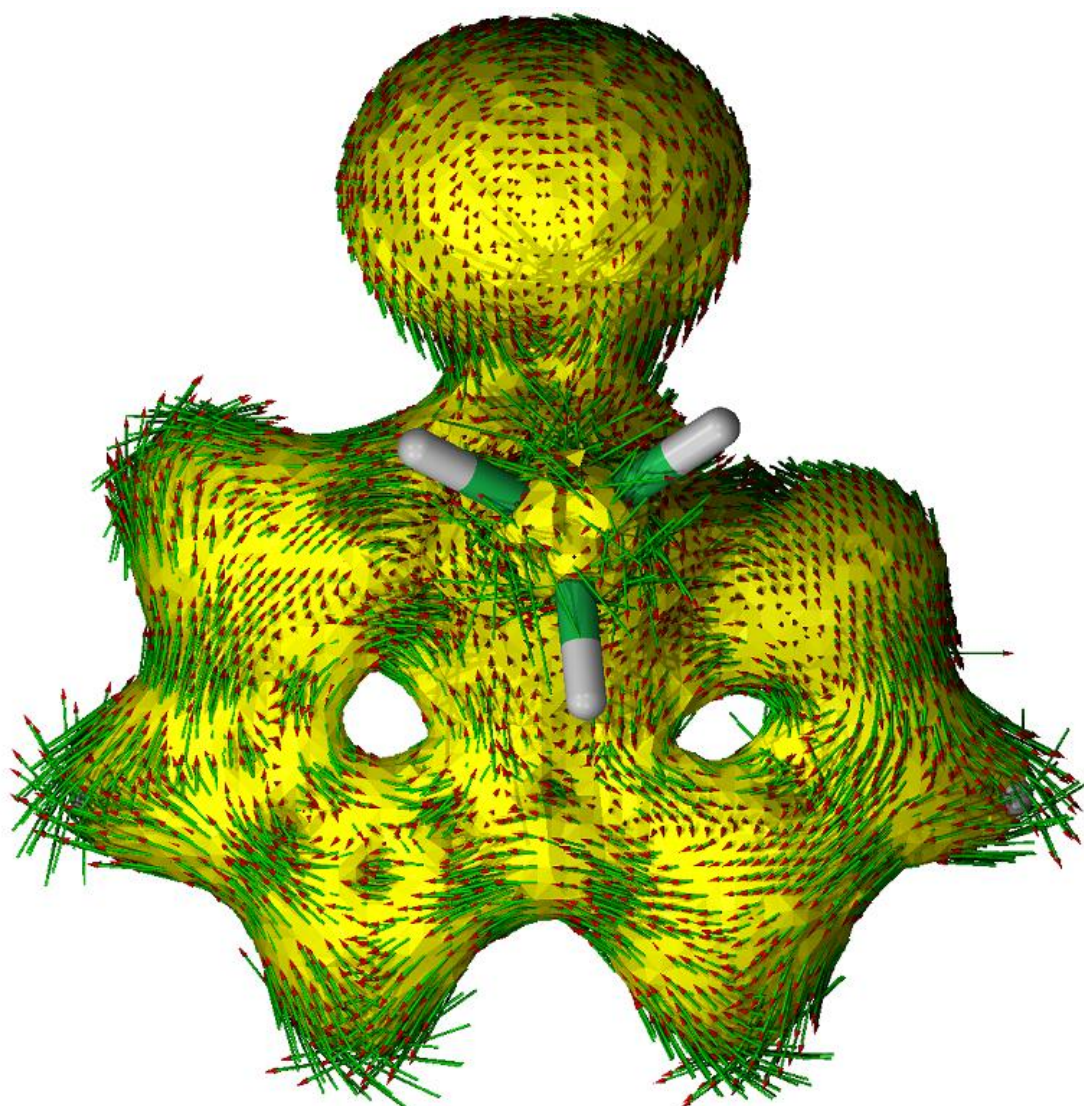

**Fig. S16.** ACID plot of Ir-N.T<sub>1</sub>. Isovalue for ACID is 0.030 a.u.

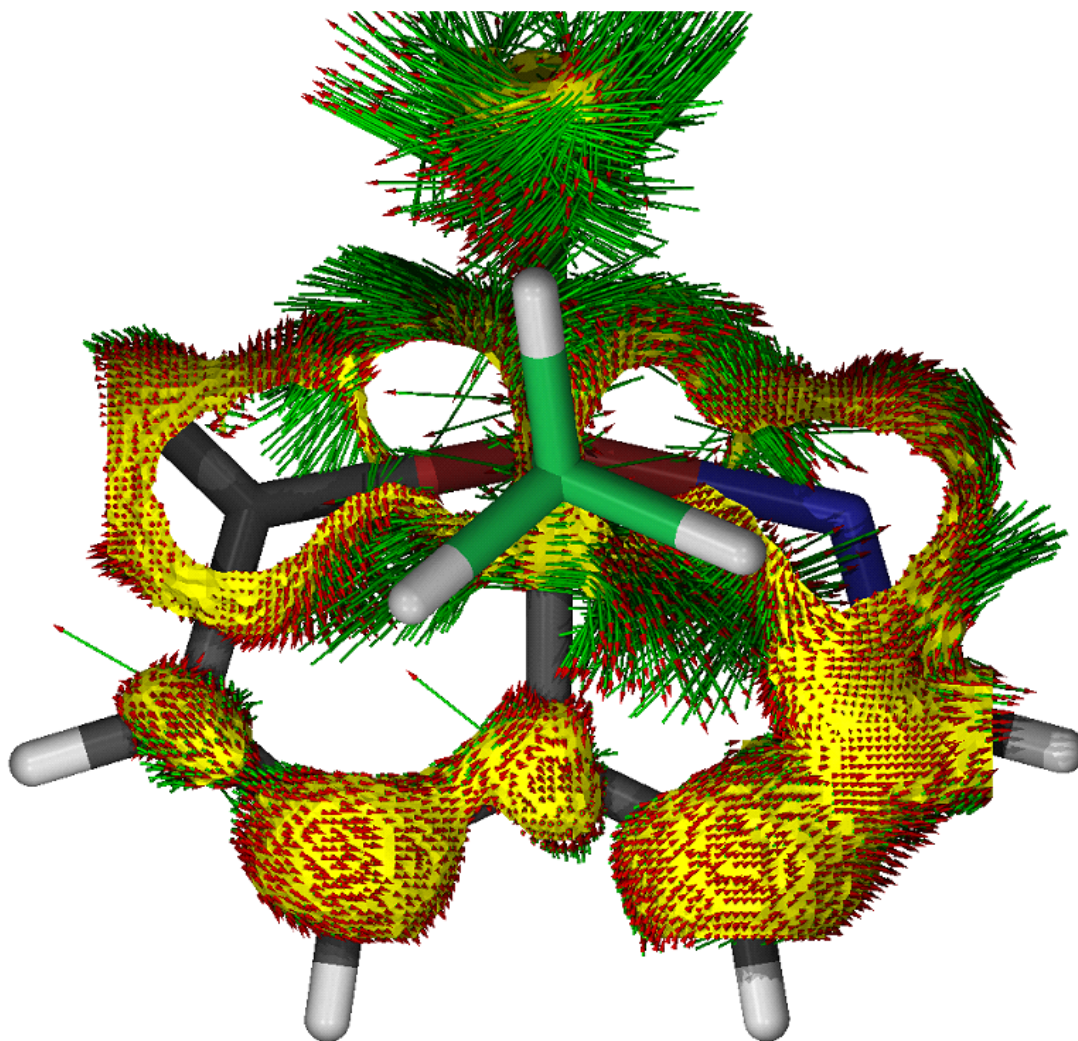

**Fig. S17.** ACID plot of HSOMO of **Os-N.T<sub>1</sub>**. Isovalue for ACID is 0.010 a.u.

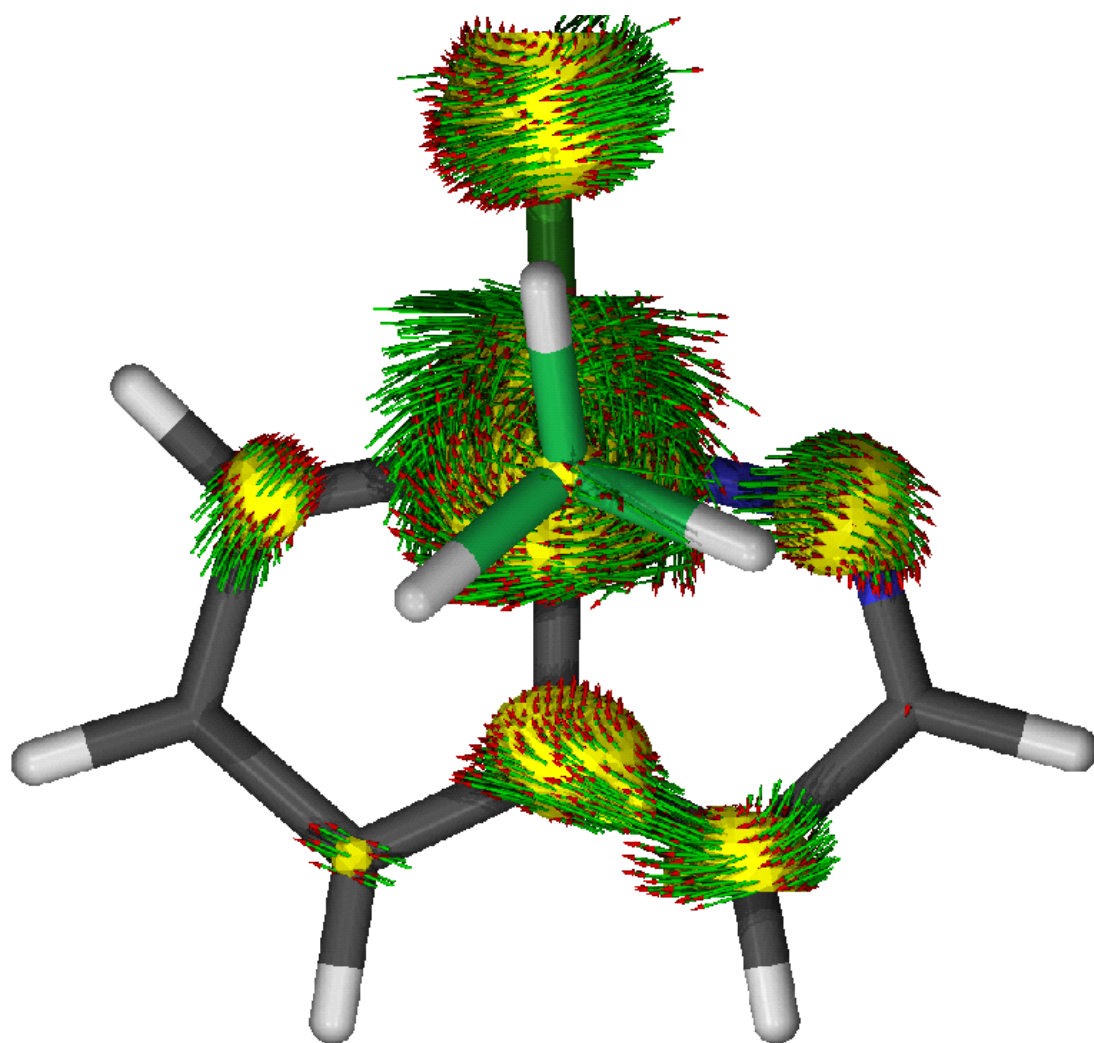

**Fig. S18.** ACID plot of HSOMO-1 of **Os-N.T<sub>1</sub>**. Isovalue for ACID is 0.010 a.u.



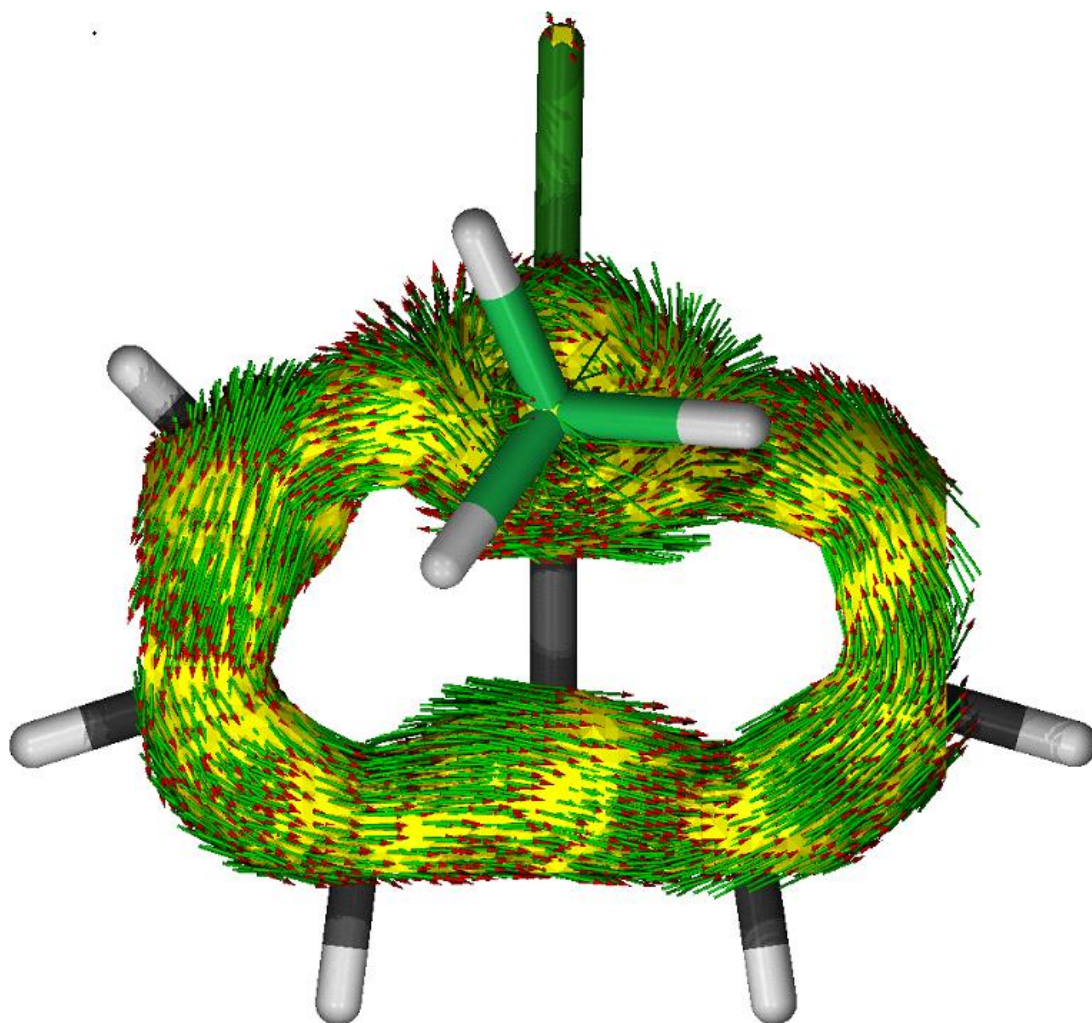

**Fig. S19.** ACID plot of HSOMO of **Os-O.T<sub>1</sub>**. Isovalue for ACID is 0.010 a.u.

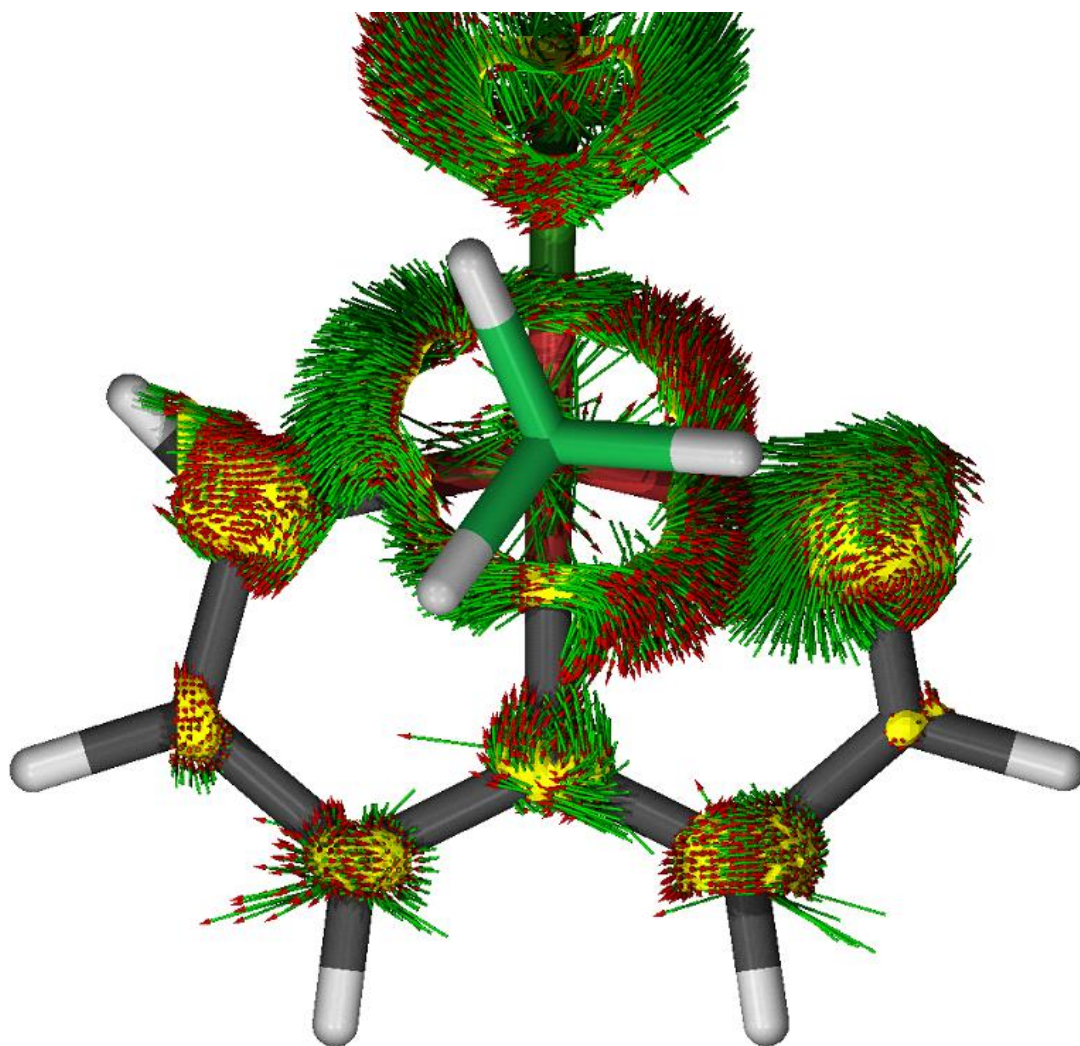

**Fig. S20.** ACID plot of HSOMO-1 of **Os-N.T<sub>1</sub>**. Isovalue for ACID is 0.010 a.u.

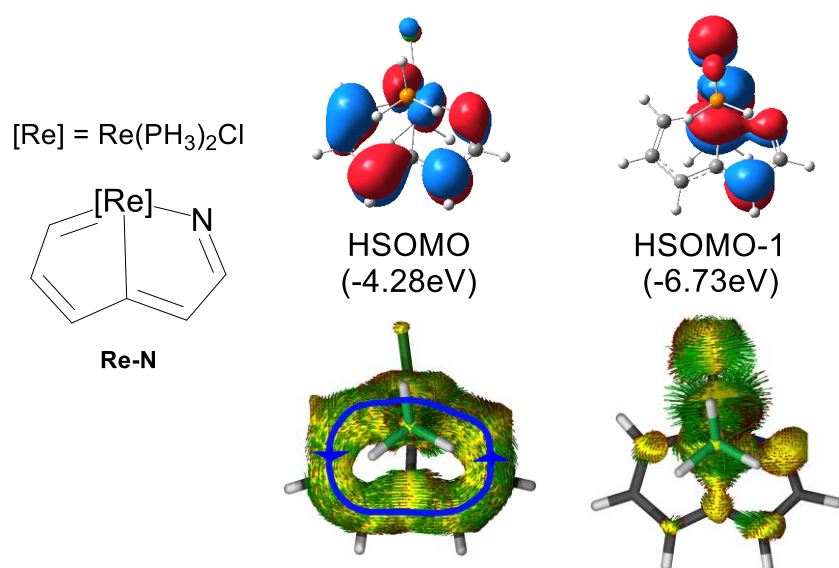

**Fig. S21.** Biorthogonalized SOMOs and the ACID plots of SOMOs of **Re-N** in the  $T_1$  state. Isovalues for MO and ACID plots are 0.030 and 0.010 a.u., respectively. (The high-resolution ACID plots are provided in the Fig. S22-S23)

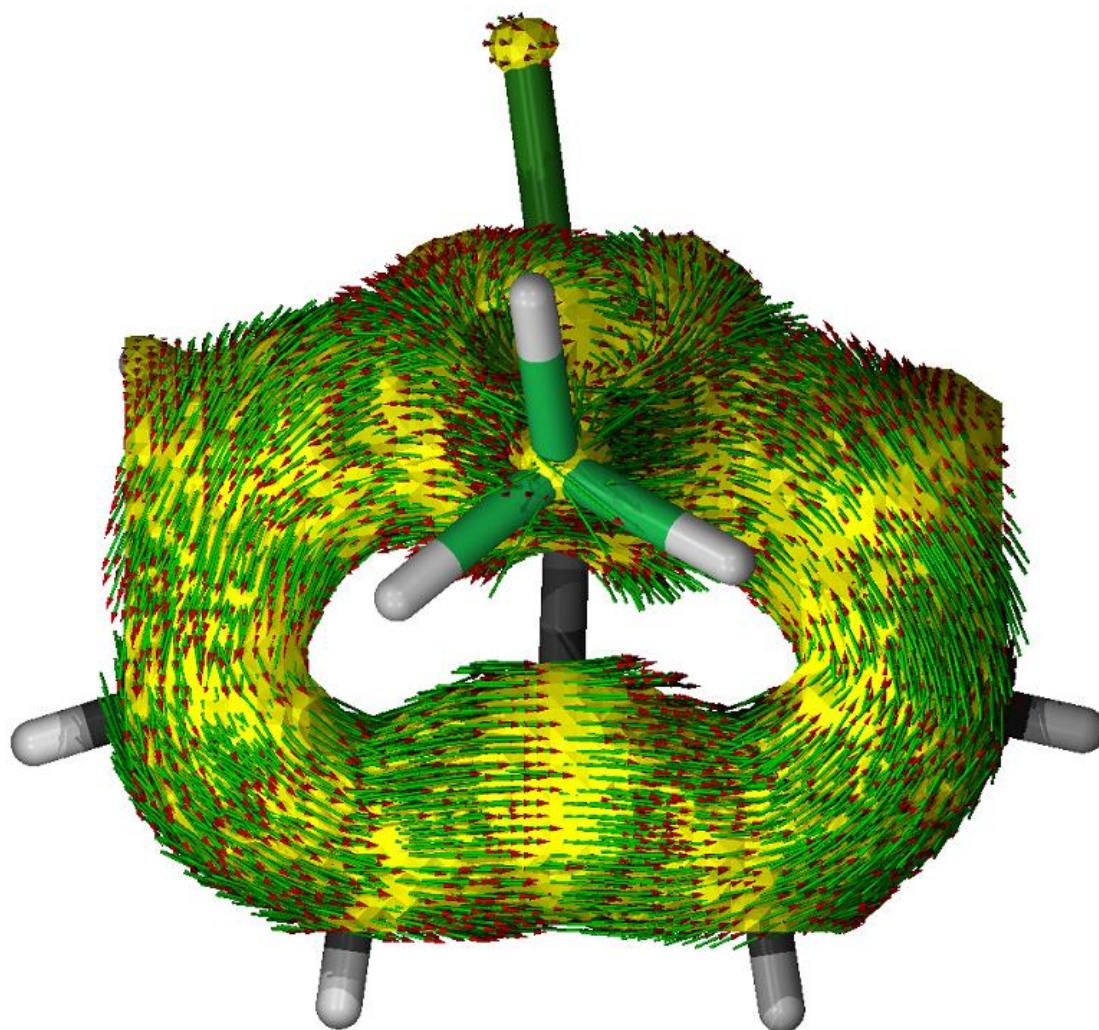

**Fig. S22.** ACID plot of HSOMO of Re-N.T<sub>1</sub>. Isovalue for ACID is 0.010 a.u.

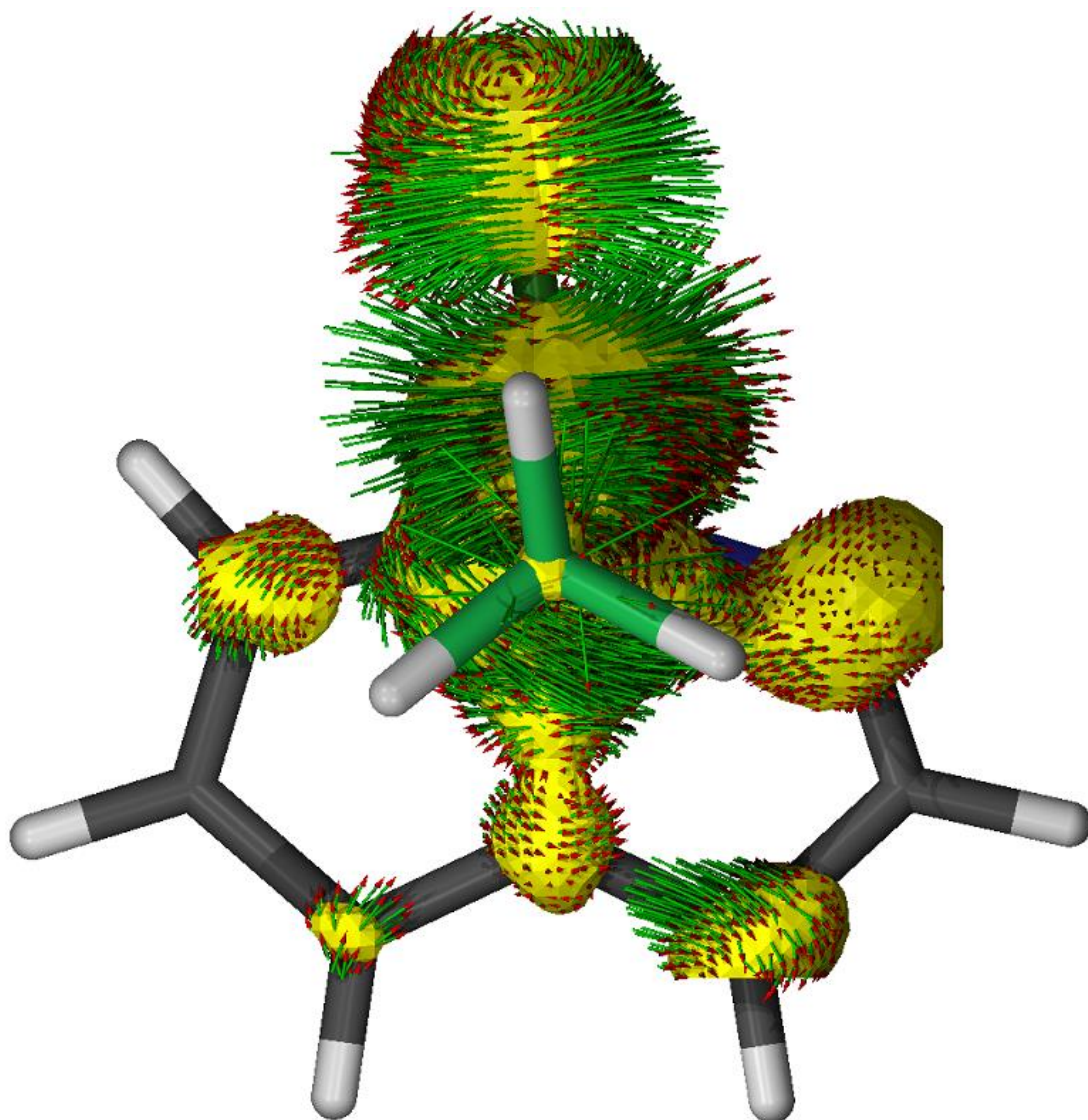

**Fig. S23.** ACID plot of HSOMO-1 of **Re-N.T<sub>1</sub>**. Isovalue for ACID is 0.010 a.u.

**Cartesian coordinates****Os-B.S<sub>0</sub>**

Energy = -378.905633 a.u.

1 1

|    |              |              |              |
|----|--------------|--------------|--------------|
| C  | 1.487274000  | 0.000618000  | 2.351992000  |
| C  | 2.162546000  | -0.000499000 | 0.035874000  |
| C  | 2.252918000  | -0.001514000 | -2.268607000 |
| C  | 3.033577000  | -0.001039000 | -1.134416000 |
| H  | 4.124928000  | -0.001097000 | -1.053661000 |
| C  | 0.217791000  | 0.000814000  | 1.888720000  |
| C  | 2.512374000  | -0.000128000 | 1.345462000  |
| H  | 3.568058000  | -0.000256000 | 1.614465000  |
| Os | -0.328536000 | 0.000074000  | -0.047776000 |
| P  | -0.463701000 | 2.413783000  | -0.005732000 |
| H  | -0.947026000 | 3.061360000  | -1.173328000 |
| H  | 0.719011000  | 3.154497000  | 0.255857000  |
| H  | -1.342245000 | 2.947280000  | 0.973623000  |
| P  | -0.465323000 | -2.413555000 | -0.004317000 |
| H  | 0.716829000  | -3.155122000 | 0.257414000  |
| H  | -0.948774000 | -3.060408000 | -1.172261000 |
| H  | -1.344576000 | -2.946554000 | 0.974649000  |
| H  | -0.664534000 | 0.001497000  | 2.538118000  |
| H  | 1.722745000  | 0.000965000  | 3.413475000  |
| H  | 2.526646000  | -0.002022000 | -3.312312000 |
| B  | 1.081997000  | -0.000949000 | -1.354051000 |
| Cl | -2.625639000 | 0.000355000  | -0.357540000 |

**Os-C.S<sub>0</sub>**

Energy = -392.776023 a.u.

1 1

|    |              |              |              |
|----|--------------|--------------|--------------|
| Os | 0.000000000  | 0.000000000  | 0.258764000  |
| P  | 0.000000000  | 2.423902000  | 0.331151000  |
| C  | 1.873837000  | -0.047058000 | -0.364458000 |
| C  | 2.318347000  | -0.075226000 | -1.665864000 |
| C  | 1.231061000  | -0.043792000 | -2.556638000 |
| H  | 1.331603000  | -0.052461000 | -3.640646000 |
| C  | 0.000000000  | 0.000000000  | -1.897317000 |
| C  | -1.231061000 | 0.043792000  | -2.556638000 |
| H  | -1.331603000 | 0.052461000  | -3.640646000 |
| Cl | 0.000000000  | 0.000000000  | 2.635634000  |
| H  | 1.234189000  | 3.057718000  | 0.633412000  |
| H  | -0.385294000 | 3.123313000  | -0.843076000 |
| H  | -0.848886000 | 3.015391000  | 1.302444000  |
| C  | -1.873837000 | 0.047058000  | -0.364458000 |

|   |              |              |              |
|---|--------------|--------------|--------------|
| C | -2.318347000 | 0.075226000  | -1.665864000 |
| H | -2.532940000 | 0.041596000  | 0.514200000  |
| P | 0.000000000  | -2.423902000 | 0.331151000  |
| H | 0.848886000  | -3.015391000 | 1.302444000  |
| H | -1.234189000 | -3.057718000 | 0.633412000  |
| H | 0.385294000  | -3.123313000 | -0.843076000 |
| H | 3.364550000  | -0.109882000 | -1.955796000 |
| H | -3.364550000 | 0.109882000  | -1.955796000 |
| H | 2.532940000  | -0.041596000 | 0.514200000  |

**Os-C.T<sub>1</sub>**

Energy = -392.739798 a.u.

1 3

|    |              |              |              |
|----|--------------|--------------|--------------|
| Os | 0.000000000  | 0.000000000  | 0.299388000  |
| P  | -2.417624000 | 0.000000000  | 0.049466000  |
| C  | 0.000000000  | 2.006513000  | -0.162772000 |
| C  | 0.000000000  | 2.359027000  | -1.511611000 |
| C  | 0.000000000  | 1.262517000  | -2.394509000 |
| H  | 0.000000000  | 1.380060000  | -3.478250000 |
| C  | 0.000000000  | 0.000000000  | -1.767630000 |
| C  | 0.000000000  | -1.262517000 | -2.394509000 |
| H  | 0.000000000  | -1.380060000 | -3.478250000 |
| Cl | 0.000000000  | 0.000000000  | 2.635175000  |
| H  | -3.179317000 | 0.000000000  | 1.246942000  |
| H  | -2.975806000 | 1.101362000  | -0.649987000 |
| H  | -2.975806000 | -1.101362000 | -0.649987000 |
| C  | 0.000000000  | -2.006513000 | -0.162772000 |
| C  | 0.000000000  | -2.359027000 | -1.511611000 |
| H  | 0.000000000  | -2.794079000 | 0.596756000  |
| P  | 2.417624000  | 0.000000000  | 0.049466000  |
| H  | 2.975806000  | 1.101362000  | -0.649987000 |
| H  | 3.179317000  | 0.000000000  | 1.246942000  |
| H  | 2.975806000  | -1.101362000 | -0.649987000 |
| H  | 0.000000000  | 3.387242000  | -1.866972000 |
| H  | 0.000000000  | -3.387242000 | -1.866972000 |
| H  | 0.000000000  | 2.794079000  | 0.596756000  |

**Os-N.S<sub>0</sub>**

Energy = -408.841951 a.u.

1 1

|   |            |             |             |
|---|------------|-------------|-------------|
| C | 1.25037800 | 0.04108100  | 2.50268700  |
| C | 1.85100400 | -0.20674200 | 0.26249400  |
| C | 1.85218400 | -0.40442400 | -2.03225800 |
| C | 2.65290200 | -0.40384000 | -0.86140000 |

|    |             |             |             |
|----|-------------|-------------|-------------|
| H  | 3.73216200  | -0.54092400 | -0.85372000 |
| C  | 0.00542000  | 0.13859700  | 1.87396200  |
| C  | 2.29356900  | -0.15243700 | 1.59960100  |
| H  | 3.33798700  | -0.25339200 | 1.88955800  |
| Os | -0.21246200 | 0.02088100  | -0.10155300 |
| P  | -0.73151600 | -2.35966000 | 0.01688900  |
| H  | -1.55025500 | -2.76292800 | 1.10060600  |
| H  | -1.46413000 | -2.85154400 | -1.09318300 |
| H  | 0.33001700  | -3.30129500 | 0.09345000  |
| P  | 0.01667100  | 2.43543000  | -0.25480100 |
| H  | -1.15962200 | 3.17041500  | 0.03995500  |
| H  | 0.97616100  | 3.06442900  | 0.58240700  |
| H  | 0.37703900  | 2.95497100  | -1.52644100 |
| H  | -0.89907200 | 0.29017800  | 2.46720600  |
| H  | 1.38386800  | 0.10755500  | 3.57913000  |
| H  | 2.18911900  | -0.53400400 | -3.05905100 |
| N  | 0.58316000  | -0.21869400 | -1.75501200 |
| Cl | -2.58225700 | 0.31708600  | 0.01655200  |

**Os-N.T<sub>1</sub>**

Energy = -408.785437 a.u.

1 3

|    |             |             |             |
|----|-------------|-------------|-------------|
| C  | 2.43667000  | -1.33751700 | 0.00000000  |
| C  | 0.11574400  | -1.78772800 | 0.00000000  |
| C  | -2.22389200 | -1.55305300 | 0.00000000  |
| C  | -1.10097000 | -2.46035900 | 0.00000000  |
| H  | -1.21776900 | -3.54403400 | 0.00000000  |
| C  | 1.96449400  | -0.00073100 | 0.00000000  |
| C  | 1.44018400  | -2.31202900 | 0.00000000  |
| H  | 1.65842200  | -3.37952800 | 0.00000000  |
| Os | -0.02251200 | 0.26821500  | 0.00000000  |
| P  | -0.07063000 | 0.09941300  | 2.43864500  |
| H  | 0.02151000  | 1.32023400  | 3.15376600  |
| H  | -1.24403900 | -0.48136300 | 2.98582900  |
| H  | 0.95138600  | -0.67614200 | 3.04468600  |
| P  | -0.07063000 | 0.09941300  | -2.43864500 |
| H  | 0.02151000  | 1.32023400  | -3.15376600 |
| H  | 0.95138600  | -0.67614200 | -3.04468600 |
| H  | -1.24403900 | -0.48136300 | -2.98582900 |
| H  | 2.70740600  | 0.80330400  | 0.00000000  |
| H  | 3.49441900  | -1.59181200 | 0.00000000  |
| H  | -3.26005000 | -1.89986200 | 0.00000000  |
| N  | -1.94328600 | -0.27964000 | 0.00000000  |
| Cl | -0.07063000 | 2.62268800  | 0.00000000  |

**Os-O.S<sub>0</sub>**

Energy = -429.543874 a.u.

0 1

|    |             |             |             |
|----|-------------|-------------|-------------|
| C  | 1.77619200  | -0.12114200 | 2.20396200  |
| C  | 1.73705400  | -0.58829600 | -0.09262600 |
| C  | 1.13310900  | -1.02816000 | -2.30703500 |
| C  | 2.17824700  | -0.95633400 | -1.37474700 |
| H  | 3.19394500  | -1.25693600 | -1.62558200 |
| C  | 0.35829100  | -0.02938800 | 1.93129800  |
| C  | 2.53107000  | -0.48615000 | 1.11092100  |
| H  | 3.60592800  | -0.66219200 | 1.14640100  |
| Os | -0.16462300 | 0.04036900  | 0.07424900  |
| P  | -1.53027500 | -1.86527900 | 0.44334200  |
| H  | -2.32867000 | -1.86688000 | 1.62144400  |
| H  | -2.52808200 | -2.10995900 | -0.53655800 |
| H  | -0.98374700 | -3.18080800 | 0.55393700  |
| P  | 0.76141800  | 2.19973700  | -0.32253900 |
| H  | -0.05391400 | 3.32143900  | -0.01604300 |
| H  | 1.96796100  | 2.55375300  | 0.34810100  |
| H  | 1.13299900  | 2.53293900  | -1.65822600 |
| H  | -0.29272200 | -0.28217900 | 2.78116100  |
| H  | 2.19417800  | -0.02161400 | 3.20590100  |
| H  | 1.26512200  | -1.43054000 | -3.31706300 |
| Cl | -2.40823500 | 1.11742700  | -0.17472000 |
| O  | -0.05907500 | -0.67766700 | -1.97735900 |

**Os-O.T<sub>1</sub>**

Energy = -429.540611 a.u.

0 3

|    |             |             |             |
|----|-------------|-------------|-------------|
| C  | 2.78888200  | -0.40300400 | 0.00000000  |
| C  | 0.78413500  | -1.65149600 | 0.00000000  |
| C  | -1.44825700 | -2.37919500 | 0.00000000  |
| C  | -0.10921800 | -2.75327800 | 0.00000000  |
| H  | 0.20040900  | -3.79659900 | 0.00000000  |
| C  | 1.89203700  | 0.66270000  | 0.00000000  |
| C  | 2.19357000  | -1.68825200 | 0.00000000  |
| H  | 2.76946200  | -2.61331700 | 0.00000000  |
| Os | -0.07417400 | 0.20212300  | 0.00000000  |
| P  | -0.10921800 | 0.27465500  | 2.37300700  |
| H  | -0.13490200 | 1.55500100  | 2.99051400  |
| H  | -1.21104300 | -0.33363900 | 3.04164900  |
| H  | 0.95862900  | -0.32871900 | 3.09785100  |
| P  | -0.10921800 | 0.27465500  | -2.37300700 |

|    |             |             |             |
|----|-------------|-------------|-------------|
| H  | -0.13490200 | 1.55500100  | -2.99051400 |
| H  | 0.95862900  | -0.32871900 | -3.09785100 |
| H  | -1.21104300 | -0.33363900 | -3.04164900 |
| H  | 2.26670800  | 1.68987900  | 0.00000000  |
| H  | 3.86968700  | -0.26409800 | 0.00000000  |
| H  | -2.27334200 | -3.09785600 | 0.00000000  |
| Cl | -1.14822100 | 2.41042400  | 0.00000000  |
| O  | -1.77895400 | -1.12579200 | 0.00000000  |

**Re-N.S<sub>0</sub>**

Energy = -397.122027 a.u.

O 1

|    |             |             |             |
|----|-------------|-------------|-------------|
| C  | 2.53043800  | -1.16971000 | 0.00000000  |
| C  | 0.29952800  | -1.84183800 | 0.00000000  |
| C  | -1.99939200 | -1.94853400 | 0.00000000  |
| C  | -0.81761000 | -2.70275900 | 0.00000000  |
| H  | -0.77992000 | -3.79190700 | 0.00000000  |
| C  | 1.87643800  | 0.07240800  | 0.00000000  |
| C  | 1.64735100  | -2.25082700 | 0.00000000  |
| H  | 1.96678200  | -3.29341000 | 0.00000000  |
| P  | -0.05910600 | 0.28100300  | 2.43103500  |
| H  | 0.28868200  | 1.50106000  | 3.07826200  |
| H  | -1.23891500 | -0.03712500 | 3.16647500  |
| H  | 0.84871100  | -0.59662700 | 3.09257900  |
| P  | -0.05910600 | 0.28100300  | -2.43103500 |
| H  | 0.28868200  | 1.50106000  | -3.07826200 |
| H  | 0.84871100  | -0.59662700 | -3.09257900 |
| H  | -1.23891500 | -0.03712500 | -3.16647500 |
| H  | 2.47626600  | 0.98763400  | 0.00000000  |
| H  | 3.61377600  | -1.28370100 | 0.00000000  |
| H  | -3.01713700 | -2.33783400 | 0.00000000  |
| N  | -1.76576600 | -0.63651200 | 0.00000000  |
| Cl | -0.05910600 | 2.68557100  | 0.00000000  |
| Re | -0.13518500 | 0.23203900  | 0.00000000  |

**Re-N.T<sub>1</sub>**

Energy = -397.068512 a.u.

O 3

|   |             |            |            |
|---|-------------|------------|------------|
| P | -0.01506200 | 0.00636200 | 2.40742100 |
| C | 1.36185100  | 2.37926200 | 0.00000000 |
| C | -0.01506200 | 2.74707100 | 0.00000000 |
| H | -0.36565500 | 3.77861400 | 0.00000000 |
| C | -0.84960700 | 1.60253800 | 0.00000000 |
| C | -2.24794200 | 1.54363900 | 0.00000000 |

|    |             |             |             |
|----|-------------|-------------|-------------|
| H  | -2.88674800 | 2.42701100  | 0.00000000  |
| Cl | 1.05151100  | -2.48863400 | 0.00000000  |
| H  | 0.35150800  | -1.05311600 | 3.28761000  |
| H  | 0.69935000  | 1.07589800  | 3.02051600  |
| H  | -1.32781100 | 0.27285100  | 2.87999400  |
| C  | -1.81062600 | -0.77232400 | 0.00000000  |
| C  | -2.76655000 | 0.20796600  | 0.00000000  |
| H  | -2.08118100 | -1.83099500 | 0.00000000  |
| P  | -0.01506200 | 0.00636200  | -2.40742100 |
| H  | 0.69935000  | 1.07589800  | -3.02051600 |
| H  | 0.35150800  | -1.05311600 | -3.28761000 |
| H  | -1.32781100 | 0.27285100  | -2.87999400 |
| H  | 2.19431000  | 3.08575500  | 0.00000000  |
| H  | -3.83818600 | 0.00767200  | 0.00000000  |
| Re | 0.22721900  | -0.26424400 | 0.00000000  |
| N  | 1.57624600  | 1.08942700  | 0.00000000  |

**Re-O.S<sub>0</sub>**

Energy = -417.633128 a.u.

-1 1

|    |             |             |             |
|----|-------------|-------------|-------------|
| C  | 1.71327200  | -0.87086800 | 2.10894500  |
| C  | 1.75425500  | -0.52384900 | -0.20518500 |
| C  | 1.23999300  | -0.26892800 | -2.47478800 |
| C  | 2.25065000  | -0.42221500 | -1.54701500 |
| H  | 3.29287900  | -0.55981600 | -1.84213800 |
| C  | 0.33351400  | -0.66640400 | 1.85761900  |
| C  | 2.51334400  | -0.81764400 | 0.95963100  |
| H  | 3.59490300  | -0.98067200 | 0.96518900  |
| P  | -1.57807600 | -1.90617500 | -0.03683800 |
| H  | -1.83487700 | -2.64212600 | 1.17173600  |
| H  | -2.93949400 | -1.79206500 | -0.47392100 |
| H  | -1.25505900 | -3.06043800 | -0.83381000 |
| P  | 0.91804200  | 2.09893800  | 0.34949200  |
| H  | 0.20923700  | 3.26183200  | 0.79270300  |
| H  | 1.99752600  | 2.14669200  | 1.28759600  |
| H  | 1.59495800  | 2.72708600  | -0.75054000 |
| H  | -0.34793800 | -1.13894900 | 2.58586400  |
| H  | 2.11268400  | -1.16656700 | 3.08458000  |
| H  | 1.40227300  | -0.29679300 | -3.55955500 |
| Cl | -2.41065500 | 1.30233800  | 0.07471900  |
| Re | -0.21058900 | 0.01535000  | 0.05374700  |
| O  | 0.00231700  | -0.15764700 | -2.07675000 |



**Re-O.T<sub>1</sub>**

Energy = -417.635873 a.u.

-1 3

|    |             |             |             |
|----|-------------|-------------|-------------|
| C  | 2.80010600  | -0.34504500 | 0.00000000  |
| C  | 0.81510600  | -1.63604900 | 0.00000000  |
| C  | -1.40581400 | -2.43758400 | 0.00000000  |
| C  | -0.06657600 | -2.77364400 | 0.00000000  |
| H  | 0.26329200  | -3.81488000 | 0.00000000  |
| C  | 1.88942700  | 0.71918600  | 0.00000000  |
| C  | 2.22264200  | -1.64726300 | 0.00000000  |
| H  | 2.82546100  | -2.56053000 | 0.00000000  |
| P  | -0.06657600 | 0.23808700  | 2.38218600  |
| H  | -0.17865700 | 1.47070300  | 3.10380700  |
| H  | -1.05843600 | -0.48555900 | 3.12652900  |
| H  | 1.07412500  | -0.27977000 | 3.07828700  |
| P  | -0.06657600 | 0.23808700  | -2.38218600 |
| H  | -0.17865700 | 1.47070300  | -3.10380700 |
| H  | 1.07412500  | -0.27977000 | -3.07828700 |
| H  | -1.05843600 | -0.48555900 | -3.12652900 |
| H  | 2.29944600  | 1.73870800  | 0.00000000  |
| H  | 3.88548200  | -0.20335200 | 0.00000000  |
| H  | -2.20302500 | -3.19446200 | 0.00000000  |
| Cl | -1.25653700 | 2.48178200  | 0.00000000  |
| Re | -0.08741800 | 0.20711000  | 0.00000000  |
| O  | -1.79492000 | -1.19000000 | 0.00000000  |

**Ru-N.S<sub>0</sub>**

Energy = -411.625419 a.u.

1 1

|    |             |             |             |
|----|-------------|-------------|-------------|
| C  | 2.58788800  | -0.95851500 | 0.00000000  |
| C  | 0.41295600  | -1.80553800 | 0.00000000  |
| C  | -1.87562300 | -2.04560000 | 0.00000000  |
| C  | -0.62155500 | -2.72686200 | 0.00000000  |
| H  | -0.50879900 | -3.81003800 | 0.00000000  |
| C  | 1.83281800  | 0.21128800  | 0.00000000  |
| C  | 1.79111200  | -2.10149800 | 0.00000000  |
| H  | 2.18367800  | -3.11789200 | 0.00000000  |
| Ru | -0.14632000 | 0.23387200  | 0.00000000  |
| P  | -0.20224300 | 0.43176100  | 2.42788100  |
| H  | 0.78546500  | 1.25963000  | 3.01842300  |
| H  | -1.39229800 | 1.02971200  | 2.91541200  |
| H  | -0.12037900 | -0.72271100 | 3.25451000  |
| P  | -0.20224300 | 0.43176100  | -2.42788100 |
| H  | 0.78546500  | 1.25963000  | -3.01842300 |

|    |             |             |             |
|----|-------------|-------------|-------------|
| H  | -0.12037900 | -0.72271100 | -3.25451000 |
| H  | -1.39229800 | 1.02971200  | -2.91541200 |
| H  | 2.30644100  | 1.19423800  | 0.00000000  |
| H  | 3.67505300  | -0.97075100 | 0.00000000  |
| H  | -2.86669400 | -2.50018000 | 0.00000000  |
| N  | -1.73676100 | -0.75236600 | 0.00000000  |
| Cl | -0.20224300 | 2.62676900  | 0.00000000  |

**Ru-N.T<sub>1</sub>**

Energy = -411.579768 a.u.

1 3

|    |             |             |             |
|----|-------------|-------------|-------------|
| C  | 2.44190800  | -1.22330000 | 0.00000000  |
| C  | 0.12865500  | -1.71665700 | 0.00000000  |
| C  | -2.22168000 | -1.52992300 | 0.00000000  |
| C  | -1.06743300 | -2.40888300 | 0.00000000  |
| H  | -1.16182700 | -3.49565900 | 0.00000000  |
| C  | 1.94057500  | 0.09671900  | 0.00000000  |
| C  | 1.46239400  | -2.21427600 | 0.00000000  |
| H  | 1.69890700  | -3.27877900 | 0.00000000  |
| Ru | -0.03433700 | 0.34338800  | 0.00000000  |
| P  | -0.07554900 | 0.12238400  | 2.43341300  |
| H  | -0.01554100 | 1.32838900  | 3.17772400  |
| H  | -1.23588500 | -0.48933000 | 2.97537200  |
| H  | 0.95422600  | -0.63696500 | 3.04875100  |
| P  | -0.07554900 | 0.12238400  | -2.43341300 |
| H  | -0.01554100 | 1.32838900  | -3.17772400 |
| H  | 0.95422600  | -0.63696500 | -3.04875100 |
| H  | -1.23588500 | -0.48933000 | -2.97537200 |
| H  | 2.64547400  | 0.93344700  | 0.00000000  |
| H  | 3.50519900  | -1.45550600 | 0.00000000  |
| H  | -3.24732400 | -1.91144400 | 0.00000000  |
| N  | -1.98441600 | -0.25801200 | 0.00000000  |
| Cl | -0.07554900 | 2.69453900  | 0.00000000  |

**Ru-O.S<sub>0</sub>**

Energy = -432.352816 a.u.

0 1

|   |             |             |             |
|---|-------------|-------------|-------------|
| C | -1.57258600 | 0.16944900  | -2.31625400 |
| C | -1.73636900 | -0.49123000 | -0.06911700 |
| C | -1.33261600 | -1.11883600 | 2.16158600  |
| C | -2.28902200 | -0.93311400 | 1.12832900  |
| H | -3.33401200 | -1.20742500 | 1.27417400  |
| C | -0.18195200 | 0.21006500  | -1.92645500 |
| C | -2.41912000 | -0.27143900 | -1.32485900 |

|    |             |             |             |
|----|-------------|-------------|-------------|
| H  | -3.48771400 | -0.43190600 | -1.47325000 |
| P  | 1.38986700  | -1.95737700 | -0.47818300 |
| H  | 2.31037800  | -1.95905400 | -1.56143100 |
| H  | 2.25089600  | -2.35993800 | 0.57572500  |
| H  | 0.75517800  | -3.21264600 | -0.74068400 |
| P  | -0.53096000 | 2.26505500  | 0.50119600  |
| H  | 0.35407600  | 3.33636800  | 0.20839300  |
| H  | -1.74102500 | 2.79101900  | -0.04265000 |
| H  | -0.77977300 | 2.54215900  | 1.87674400  |
| H  | 0.55749200  | 0.12247900  | -2.73408200 |
| H  | -1.90770300 | 0.38045500  | -3.33212600 |
| H  | -1.61012200 | -1.59649800 | 3.11198000  |
| Cl | 2.54850300  | 0.90215300  | 0.20204800  |
| O  | -0.11765100 | -0.79261200 | 2.00307600  |
| Ru | 0.19444000  | 0.05897100  | -0.06560900 |

**Ru-O.T<sub>1</sub>**

Energy = -432.351171 a.u.

0 3

|    |             |             |             |
|----|-------------|-------------|-------------|
| C  | 2.68467500  | -0.74647900 | 0.00000000  |
| C  | 0.53161900  | -1.71308600 | 0.00000000  |
| C  | -1.78834100 | -2.13727900 | 0.00000000  |
| C  | -0.49390300 | -2.67541000 | 0.00000000  |
| H  | -0.32161400 | -3.75129600 | 0.00000000  |
| C  | 1.93695400  | 0.42092000  | 0.00000000  |
| C  | 1.92286500  | -1.93863300 | 0.00000000  |
| H  | 2.36854700  | -2.93386400 | 0.00000000  |
| Ru | -0.07119600 | 0.25085800  | 0.00000000  |
| P  | -0.07119600 | 0.35525300  | 2.37800800  |
| H  | 0.37001800  | 1.56710900  | 2.97446100  |
| H  | -1.32163800 | 0.21674400  | 3.04606600  |
| H  | 0.69125400  | -0.57103000 | 3.14841200  |
| P  | -0.07119600 | 0.35525300  | -2.37800800 |
| H  | 0.37001800  | 1.56710900  | -2.97446100 |
| H  | 0.69125400  | -0.57103000 | -3.14841200 |
| H  | -1.32163800 | 0.21674400  | -3.04606600 |
| H  | 2.41007800  | 1.40519300  | 0.00000000  |
| H  | 3.77502300  | -0.75067700 | 0.00000000  |
| H  | -2.68491600 | -2.76955000 | 0.00000000  |
| Cl | -0.75100400 | 2.61049100  | 0.00000000  |
| O  | -1.96925300 | -0.86992100 | 0.00000000  |

**Ir-N.S<sub>0</sub>**

Energy = -422.051304 a.u.

2 1

|    |             |             |             |
|----|-------------|-------------|-------------|
| C  | 1.24297300  | -0.00057100 | 2.51455200  |
| C  | 1.88233500  | -0.00125700 | 0.25627800  |
| C  | 1.88044300  | -0.00196600 | -2.05706900 |
| C  | 2.69003800  | -0.00219800 | -0.86557700 |
| H  | 3.77889500  | -0.00299300 | -0.86688300 |
| C  | -0.00102600 | 0.00021300  | 1.90149500  |
| C  | 2.30263200  | -0.00130500 | 1.60409600  |
| H  | 3.35284800  | -0.00183800 | 1.89486700  |
| P  | -0.42592900 | -2.44359400 | -0.14942300 |
| H  | -1.17046200 | -2.97661900 | 0.93033000  |
| H  | -1.14176500 | -2.84965600 | -1.30225600 |
| H  | 0.75653400  | -3.22651900 | -0.17878900 |
| P  | -0.42118400 | 2.44430700  | -0.15012400 |
| H  | -1.16467400 | 2.97925800  | 0.92939500  |
| H  | 0.76292800  | 3.22472500  | -0.17957500 |
| H  | -1.13605800 | 2.85164000  | -1.30311700 |
| H  | -0.92755900 | 0.00094500  | 2.47844900  |
| H  | 1.36692400  | -0.00059200 | 3.59493400  |
| H  | 2.22667600  | -0.00239900 | -3.09258400 |
| N  | 0.61973600  | -0.00100300 | -1.77819500 |
| Cl | -2.54056800 | 0.00214300  | 0.03344800  |
| Ir | -0.19650000 | 0.00008400  | -0.08643500 |

**Ir-N.T<sub>1</sub>**

Energy = -422.011590 a.u.

2 3

|   |             |             |             |
|---|-------------|-------------|-------------|
| C | 1.35834700  | -0.08128000 | 2.42478800  |
| C | 1.75610500  | -0.31600800 | 0.09759700  |
| C | 1.51579000  | -0.46797200 | -2.25603200 |
| C | 2.40978800  | -0.53127500 | -1.10543300 |
| H | 3.47511400  | -0.73352600 | -1.21206200 |
| C | 0.04363700  | 0.12506800  | 1.95701900  |
| C | 2.29719300  | -0.32359200 | 1.42329300  |
| H | 3.35175300  | -0.50712500 | 1.62679500  |
| P | -0.69280500 | -2.36000400 | 0.05681600  |
| H | -1.42084100 | -2.80974700 | 1.18586100  |
| H | -1.46250500 | -2.79150300 | -1.05148800 |
| H | 0.45096600  | -3.19660000 | 0.03356800  |
| P | 0.33215100  | 2.42371200  | -0.21030000 |
| H | -0.75811500 | 3.30294500  | 0.00353000  |
| H | 1.32830900  | 2.88609800  | 0.68514400  |

|    |             |             |             |
|----|-------------|-------------|-------------|
| H  | 0.82230700  | 2.78123300  | -1.49104600 |
| H  | -0.76607600 | 0.30420700  | 2.67019600  |
| H  | 1.61487800  | -0.05804500 | 3.48143800  |
| H  | 1.84437300  | -0.62466400 | -3.28726700 |
| N  | 0.28431900  | -0.20937000 | -1.97805900 |
| Cl | -2.56408200 | 0.44596600  | -0.06176700 |
| Ir | -0.23060200 | 0.05124200  | -0.00900500 |

**Ir-O.S<sub>0</sub>**

Energy = -442.965646 a.u.

1 1

|    |             |             |             |
|----|-------------|-------------|-------------|
| C  | 2.75712000  | -0.61076900 | 0.00000000  |
| C  | 0.67103900  | -1.72872700 | 0.00000000  |
| C  | -1.62216300 | -2.27707600 | 0.00000000  |
| C  | -0.26176400 | -2.74527500 | 0.00000000  |
| H  | -0.03549000 | -3.80944400 | 0.00000000  |
| C  | 1.87568300  | 0.53673900  | 0.00000000  |
| C  | 2.12156100  | -1.83169000 | 0.00000000  |
| H  | 2.65271600  | -2.78197300 | 0.00000000  |
| P  | -0.26176400 | 0.42848800  | 2.35504700  |
| H  | 0.32182000  | 1.60648800  | 2.87764700  |
| H  | -1.62524200 | 0.56755200  | 2.71062000  |
| H  | 0.18727100  | -0.56435400 | 3.26996800  |
| P  | -0.26176400 | 0.42848800  | -2.35504700 |
| H  | 0.32182000  | 1.60648800  | -2.87764700 |
| H  | 0.18727100  | -0.56435400 | -3.26996800 |
| H  | -1.62524200 | 0.56755200  | -2.71062000 |
| H  | 2.32144200  | 1.53661800  | 0.00000000  |
| H  | 3.83911700  | -0.50350800 | 0.00000000  |
| H  | -2.47007500 | -2.97035300 | 0.00000000  |
| Cl | -0.87522200 | 2.45103700  | 0.00000000  |
| Ir | 0.00622700  | 0.14328400  | 0.00000000  |
| O  | -1.88400800 | -1.03812900 | 0.00000000  |

**Ir-O.T<sub>1</sub>**

Energy = -442.941393 a.u.

1 3

|   |            |             |             |
|---|------------|-------------|-------------|
| C | 1.42941100 | -0.00002000 | 2.41786300  |
| C | 1.83028900 | -0.00000400 | 0.09106100  |
| C | 1.63704500 | 0.00003400  | -2.24967200 |
| C | 2.49684300 | 0.00000700  | -1.14489700 |
| H | 3.57841200 | -0.00000100 | -1.25130600 |
| C | 0.11555300 | -0.00001700 | 1.99773000  |
| C | 2.39268200 | -0.00001900 | 1.38019600  |

|    |             |             |             |
|----|-------------|-------------|-------------|
| H  | 3.46580400  | -0.00002200 | 1.55726500  |
| P  | -0.32344900 | -2.38479200 | 0.00068700  |
| H  | -1.39795600 | -2.92686800 | 0.74719700  |
| H  | -0.51603100 | -2.97184600 | -1.27641700 |
| H  | 0.79145700  | -3.10898400 | 0.49737100  |
| P  | -0.32344200 | 2.38479200  | 0.00072300  |
| H  | -1.39795000 | 2.92685700  | 0.74723800  |
| H  | 0.79146400  | 3.10897400  | 0.49742000  |
| H  | -0.51602000 | 2.97186400  | -1.27637400 |
| H  | -0.73040900 | -0.00001900 | 2.68493500  |
| H  | 1.70040000  | -0.00002700 | 3.47138900  |
| H  | 1.97609500  | 0.00002000  | -3.28816300 |
| Cl | -2.59646300 | 0.00000500  | -0.08868000 |
| Ir | -0.21050600 | 0.00000000  | -0.00062200 |
| O  | 0.36199800  | 0.00001300  | -2.06624500 |

**Os-N.SnCl<sup>3-</sup>.S<sub>0</sub>**

Energy = -442.252644 a.u.

1 1

|    |              |              |              |
|----|--------------|--------------|--------------|
| C  | -2.260915000 | 0.000785000  | -2.549127000 |
| C  | -3.039287000 | 0.000153000  | -0.346509000 |
| C  | -3.166732000 | -0.000481000 | 1.960283000  |
| C  | -3.905328000 | -0.000082000 | 0.746151000  |
| H  | -4.992756000 | 0.000011000  | 0.693009000  |
| C  | -1.043910000 | 0.000515000  | -1.855358000 |
| C  | -3.375878000 | 0.000578000  | -1.711967000 |
| H  | -4.402064000 | 0.000736000  | -2.076267000 |
| Os | -0.955888000 | -0.000123000 | 0.137534000  |
| P  | -0.858520000 | -2.432951000 | 0.160461000  |
| H  | -0.086339000 | -3.075532000 | -0.839146000 |
| H  | -0.327745000 | -3.010289000 | 1.341196000  |
| H  | -2.095477000 | -3.123525000 | 0.040520000  |
| P  | -0.858495000 | 2.432713000  | 0.161648000  |
| H  | -0.085956000 | 3.075641000  | -0.837443000 |
| H  | -2.095419000 | 3.123316000  | 0.041572000  |
| H  | -0.328137000 | 3.009570000  | 1.342802000  |
| H  | -0.109864000 | 0.000663000  | -2.427817000 |
| H  | -2.325077000 | 0.001151000  | -3.634159000 |
| H  | -3.563592000 | -0.000743000 | 2.973978000  |
| N  | -1.873752000 | -0.000541000 | 1.735715000  |
| Sn | 1.848369000  | -0.000068000 | 0.019112000  |
| Cl | 2.630806000  | 0.000692000  | -2.205508000 |
| Cl | 2.810368000  | -1.891706000 | 1.029829000  |
| Cl | 2.809722000  | 1.891621000  | 1.030447000  |

**Os-N.SnCl<sup>3-</sup>.T<sub>1</sub>**

Energy = -442.207923 a.u.

1 3

|    |              |              |              |
|----|--------------|--------------|--------------|
| P  | -1.040519000 | 2.541150000  | 0.088351000  |
| C  | -2.085415000 | -0.126705000 | -2.535311000 |
| C  | -3.237379000 | -0.361424000 | -1.721392000 |
| H  | -4.233357000 | -0.543437000 | -2.122075000 |
| C  | -2.931442000 | -0.297561000 | -0.367742000 |
| C  | -3.770136000 | -0.377927000 | 0.769820000  |
| H  | -4.843994000 | -0.543826000 | 0.683992000  |
| H  | -0.723821000 | 3.206335000  | -1.124003000 |
| H  | -2.310628000 | 3.103278000  | 0.391516000  |
| H  | -0.222986000 | 3.243498000  | 1.012358000  |
| C  | -1.733397000 | 0.044592000  | 1.923780000  |
| C  | -3.127238000 | -0.197894000 | 1.994401000  |
| H  | -1.208309000 | 0.200969000  | 2.872193000  |
| P  | -0.829868000 | -2.308704000 | 0.158930000  |
| H  | -0.807598000 | -2.961952000 | -1.101742000 |
| H  | 0.236544000  | -2.968278000 | 0.823383000  |
| H  | -1.948868000 | -2.925360000 | 0.779315000  |
| H  | -2.091134000 | -0.130834000 | -3.626306000 |
| H  | -3.672004000 | -0.231128000 | 2.935453000  |
| Os | -0.932163000 | 0.112760000  | 0.093551000  |
| Sn | 1.853161000  | -0.035767000 | -0.004317000 |
| Cl | 2.689639000  | -0.331792000 | 2.161809000  |
| Cl | 2.644117000  | -1.805649000 | -1.296570000 |
| Cl | 2.684106000  | 1.986979000  | -0.835007000 |
| N  | -0.989329000 | 0.105992000  | -1.860376000 |

**Os-N.BMe<sup>2-</sup>.S<sub>0</sub>**

Energy = -498.528956 a.u.

1 1

|    |              |              |              |
|----|--------------|--------------|--------------|
| C  | -0.884042000 | -0.005490000 | 2.673570000  |
| C  | -1.861788000 | -0.000479000 | 0.556932000  |
| C  | -2.218565000 | 0.004923000  | -1.760733000 |
| C  | -2.811302000 | 0.002284000  | -0.458794000 |
| H  | -3.888262000 | 0.002578000  | -0.281587000 |
| C  | 0.291915000  | -0.004115000 | 1.900503000  |
| C  | -2.073644000 | -0.003500000 | 1.946015000  |
| H  | -3.061950000 | -0.004229000 | 2.403010000  |
| Os | 0.130444000  | 0.000169000  | -0.137064000 |
| P  | -0.007869000 | 2.404809000  | -0.167258000 |
| H  | -0.122589000 | 3.077656000  | 1.077517000  |

|   |              |              |              |
|---|--------------|--------------|--------------|
| H | 1.041904000  | 3.152225000  | -0.768169000 |
| H | -1.124146000 | 2.937940000  | -0.867433000 |
| P | -0.010655000 | -2.404140000 | -0.176454000 |
| H | 1.039216000  | -3.150862000 | -0.778056000 |
| H | -0.128548000 | -3.081090000 | 1.065795000  |
| H | -1.126355000 | -2.933437000 | -0.880463000 |
| H | 1.212025000  | -0.005468000 | 2.483721000  |
| H | -0.864883000 | -0.007854000 | 3.761363000  |
| H | -2.817855000 | 0.007195000  | -2.675650000 |
| N | -0.908469000 | 0.004360000  | -1.824235000 |
| B | 2.175696000  | -0.000785000 | 0.068839000  |
| C | 3.436177000  | -0.002783000 | 0.976542000  |
| H | 4.066173000  | -0.877185000 | 0.753000000  |
| H | 4.067280000  | 0.871466000  | 0.755573000  |
| H | 3.242805000  | -0.004285000 | 2.054951000  |
| C | 2.300585000  | 0.002074000  | -1.547409000 |
| H | 2.894974000  | 0.893213000  | -1.794570000 |
| H | 2.894816000  | -0.888228000 | -1.797867000 |
| H | 1.444278000  | 0.003410000  | -2.232871000 |

**Os-N.BMe<sup>2-</sup>.T<sub>1</sub>**

Energy = -498.483179 a.u.

1 3

|    |              |              |              |
|----|--------------|--------------|--------------|
| C  | -1.903053000 | 0.585503000  | 2.110773000  |
| C  | -2.009584000 | -0.215019000 | -0.109571000 |
| C  | -1.386830000 | -0.748292000 | -2.295085000 |
| C  | -2.458369000 | -0.628344000 | -1.353786000 |
| H  | -3.503272000 | -0.802184000 | -1.610413000 |
| C  | -0.525128000 | 0.712066000  | 1.810268000  |
| C  | -2.704331000 | 0.090474000  | 1.081732000  |
| H  | -3.783964000 | -0.027291000 | 1.178889000  |
| Os | 0.100936000  | 0.104753000  | 0.009438000  |
| P  | 0.207023000  | 2.396504000  | -0.731617000 |
| H  | 1.040474000  | 3.301335000  | -0.018212000 |
| H  | 0.639630000  | 2.637678000  | -2.063183000 |
| H  | -1.007276000 | 3.138156000  | -0.722716000 |
| P  | -0.023280000 | -2.183324000 | 0.745193000  |
| H  | 1.112182000  | -2.855101000 | 1.275669000  |
| H  | -0.974082000 | -2.452118000 | 1.765833000  |
| H  | -0.419337000 | -3.118539000 | -0.250522000 |
| H  | 0.090738000  | 1.208505000  | 2.569666000  |
| H  | -2.324464000 | 0.884572000  | 3.068555000  |
| H  | -1.531446000 | -1.053813000 | -3.333510000 |
| N  | -0.194716000 | -0.449215000 | -1.843015000 |

|   |             |              |              |
|---|-------------|--------------|--------------|
| B | 2.325197000 | -0.266581000 | 0.069538000  |
| C | 3.050099000 | 0.504726000  | 1.229260000  |
| H | 3.313215000 | -0.239188000 | 2.000014000  |
| H | 4.003363000 | 0.910614000  | 0.855720000  |
| H | 2.503865000 | 1.307710000  | 1.731351000  |
| C | 3.015298000 | -1.193236000 | -0.977546000 |
| H | 3.855915000 | -1.747252000 | -0.532500000 |
| H | 2.365780000 | -1.888270000 | -1.516384000 |
| H | 3.459784000 | -0.533572000 | -1.742071000 |

**Os-N.H.S<sub>0</sub>**

Energy = -394.423664 a.u.

1 1

|    |              |              |              |
|----|--------------|--------------|--------------|
| C  | 0.387057000  | -0.146389000 | -2.646777000 |
| C  | 0.238004000  | 1.373553000  | -0.874456000 |
| C  | -0.023574000 | 2.330994000  | 1.209650000  |
| C  | 0.207254000  | 2.580837000  | -0.166237000 |
| H  | 0.336634000  | 3.571207000  | -0.601371000 |
| C  | 0.146880000  | -1.039313000 | -1.595513000 |
| C  | 0.440378000  | 1.192579000  | -2.251662000 |
| H  | 0.618510000  | 2.014140000  | -2.943902000 |
| Os | -0.071950000 | -0.387114000 | 0.289573000  |
| P  | -2.478346000 | -0.412438000 | 0.079045000  |
| H  | -3.040797000 | -1.268772000 | -0.900936000 |
| H  | -3.183046000 | -0.831259000 | 1.238254000  |
| H  | -3.153407000 | 0.806380000  | -0.206983000 |
| P  | 2.307842000  | -0.666856000 | 0.591439000  |
| H  | 2.796009000  | -1.958492000 | 0.914711000  |
| H  | 3.134119000  | -0.338667000 | -0.517020000 |
| H  | 2.912504000  | 0.111220000  | 1.615557000  |
| H  | 0.085283000  | -2.104475000 | -1.822348000 |
| H  | 0.516256000  | -0.465746000 | -3.678016000 |
| H  | -0.093040000 | 3.070201000  | 2.006202000  |
| N  | -0.148428000 | 1.043535000  | 1.458682000  |
| H  | -0.240254000 | -2.053979000 | 0.570217000  |

**Os-N.H.T<sub>1</sub>**

Energy = -394.373277 a.u.

1 3

|   |              |              |              |
|---|--------------|--------------|--------------|
| C | -1.130431000 | -2.266070000 | -0.996142000 |
| C | -1.435428000 | 0.071571000  | -1.008588000 |
| C | -0.894627000 | 2.349495000  | -0.862438000 |
| C | -1.795379000 | 1.354257000  | -1.377158000 |
| H | -2.620422000 | 1.602995000  | -2.043995000 |

|    |              |              |              |
|----|--------------|--------------|--------------|
| C  | 0.017085000  | -1.925886000 | -0.233793000 |
| C  | -1.913037000 | -1.192660000 | -1.421913000 |
| H  | -2.788169000 | -1.317161000 | -2.059309000 |
| Os | 0.336699000  | -0.003346000 | 0.194944000  |
| P  | -1.444642000 | -0.027158000 | 1.812519000  |
| H  | -2.473657000 | -0.982064000 | 1.604483000  |
| H  | -1.103142000 | -0.260114000 | 3.167513000  |
| H  | -2.181789000 | 1.183129000  | 1.908616000  |
| P  | 2.677854000  | -0.030290000 | -0.398180000 |
| H  | 3.422995000  | -1.189030000 | -0.056282000 |
| H  | 3.013324000  | 0.096704000  | -1.775424000 |
| H  | 3.476885000  | 0.998117000  | 0.164308000  |
| H  | 0.695493000  | -2.749622000 | 0.014125000  |
| H  | -1.367313000 | -3.291831000 | -1.271403000 |
| H  | -0.992979000 | 3.414049000  | -1.083538000 |
| N  | 0.093942000  | 1.906068000  | -0.127777000 |
| H  | 1.084796000  | -0.075885000 | 1.694678000  |

**Os-N.PMe<sub>3</sub>.S<sub>0</sub>**

Energy = -519.795557 a.u.

2 1

|    |              |              |              |
|----|--------------|--------------|--------------|
| C  | 1.573586000  | 0.093898000  | 2.543124000  |
| C  | 2.300192000  | -0.006387000 | 0.321208000  |
| C  | 2.366039000  | -0.131363000 | -1.985263000 |
| C  | 3.138700000  | -0.074459000 | -0.789474000 |
| H  | 4.226830000  | -0.087027000 | -0.764390000 |
| C  | 0.343819000  | 0.072406000  | 1.877678000  |
| C  | 2.668718000  | 0.053503000  | 1.677479000  |
| H  | 3.703855000  | 0.063826000  | 2.015670000  |
| Os | 0.198835000  | -0.008697000 | -0.108857000 |
| P  | 0.245212000  | -2.460936000 | -0.059994000 |
| H  | -0.647937000 | -3.156681000 | -0.916788000 |
| H  | 1.486060000  | -3.026168000 | -0.454302000 |
| H  | 0.011754000  | -3.108892000 | 1.179598000  |
| P  | 0.409622000  | 2.429811000  | -0.222555000 |
| H  | -0.706651000 | 3.237945000  | -0.562372000 |
| H  | 0.867099000  | 3.068970000  | 0.958402000  |
| H  | 1.359860000  | 2.866607000  | -1.182473000 |
| H  | -0.570164000 | 0.105298000  | 2.479302000  |
| H  | 1.667164000  | 0.138307000  | 3.625120000  |
| H  | 2.735321000  | -0.188194000 | -3.008362000 |
| N  | 1.082541000  | -0.104680000 | -1.724031000 |
| P  | -2.364913000 | 0.036633000  | 0.002044000  |
| C  | -3.129858000 | 1.486248000  | 0.863596000  |

|   |              |              |              |
|---|--------------|--------------|--------------|
| H | -2.863622000 | 2.421504000  | 0.364130000  |
| H | -4.219977000 | 1.384371000  | 0.842676000  |
| H | -2.806661000 | 1.532588000  | 1.908038000  |
| C | -3.179812000 | -1.426998000 | 0.791855000  |
| H | -4.266560000 | -1.293591000 | 0.770912000  |
| H | -2.939000000 | -2.345904000 | 0.249506000  |
| H | -2.864567000 | -1.530255000 | 1.834752000  |
| C | -3.030836000 | 0.088385000  | -1.727672000 |
| H | -4.125654000 | 0.096673000  | -1.690369000 |
| H | -2.686972000 | 0.989106000  | -2.243684000 |
| H | -2.701553000 | -0.788784000 | -2.291610000 |

**Os-N.PMe<sub>3</sub>.T<sub>1</sub>**

Energy = -519.738808 a.u.

2 3

|    |              |              |              |
|----|--------------|--------------|--------------|
| C  | 2.135767000  | -0.390470000 | 2.189692000  |
| C  | 2.194326000  | -0.416144000 | -0.184240000 |
| C  | 1.588192000  | -0.141247000 | -2.441247000 |
| C  | 2.637038000  | -0.445650000 | -1.499950000 |
| H  | 3.665485000  | -0.637880000 | -1.804195000 |
| C  | 0.776337000  | -0.062715000 | 1.967574000  |
| C  | 2.903361000  | -0.572254000 | 1.038557000  |
| H  | 3.970855000  | -0.790800000 | 1.069581000  |
| Os | 0.184906000  | 0.119691000  | 0.052407000  |
| P  | 0.079835000  | -2.333440000 | -0.020647000 |
| H  | -1.123940000 | -3.010978000 | 0.307399000  |
| H  | 0.376980000  | -2.889740000 | -1.292371000 |
| H  | 1.005059000  | -2.988727000 | 0.829695000  |
| P  | 0.825341000  | 2.500992000  | 0.075879000  |
| H  | -0.144167000 | 3.438116000  | 0.522061000  |
| H  | 1.927089000  | 2.816183000  | 0.911748000  |
| H  | 1.214917000  | 3.048489000  | -1.173789000 |
| H  | 0.153113000  | 0.078814000  | 2.856833000  |
| H  | 2.562947000  | -0.490833000 | 3.184924000  |
| H  | 1.735255000  | -0.121224000 | -3.522721000 |
| N  | 0.429685000  | 0.123332000  | -1.905918000 |
| P  | -2.346146000 | -0.003168000 | 0.027372000  |
| C  | -2.990055000 | 1.732825000  | -0.102885000 |
| H  | -2.620151000 | 2.208182000  | -1.015429000 |
| H  | -4.085327000 | 1.689001000  | -0.147475000 |
| H  | -2.700628000 | 2.320631000  | 0.772277000  |
| C  | -3.161567000 | -0.714801000 | 1.524248000  |
| H  | -4.249152000 | -0.644698000 | 1.409731000  |
| H  | -2.895495000 | -1.766911000 | 1.658099000  |

|   |              |              |              |
|---|--------------|--------------|--------------|
| H | -2.864011000 | -0.156306000 | 2.416376000  |
| C | -3.047713000 | -0.882246000 | -1.436034000 |
| H | -4.133493000 | -0.738588000 | -1.458081000 |
| H | -2.609900000 | -0.475976000 | -2.351950000 |
| H | -2.845659000 | -1.956105000 | -1.387564000 |

**Os-N.H<sub>2</sub>O.S<sub>0</sub>**

Energy = -469.914259 a.u.

2 1

|    |              |              |              |
|----|--------------|--------------|--------------|
| C  | 0.000035000  | 1.133109000  | 2.484084000  |
| C  | -0.000250000 | 1.710866000  | 0.215293000  |
| C  | -0.000325000 | 1.656898000  | -2.095502000 |
| C  | -0.000374000 | 2.488911000  | -0.937470000 |
| H  | -0.000524000 | 3.576278000  | -0.966392000 |
| C  | 0.000136000  | -0.121734000 | 1.872593000  |
| C  | -0.000205000 | 2.169841000  | 1.550645000  |
| H  | -0.000323000 | 3.226411000  | 1.813019000  |
| Os | 0.000029000  | -0.371267000 | -0.088881000 |
| P  | 2.465256000  | -0.301601000 | -0.086793000 |
| H  | 3.174428000  | -1.527380000 | 0.034937000  |
| H  | 3.045599000  | 0.251631000  | -1.257297000 |
| H  | 3.052205000  | 0.468954000  | 0.949018000  |
| P  | -2.465178000 | -0.302254000 | -0.086575000 |
| H  | -3.174170000 | -1.528210000 | 0.034385000  |
| H  | -3.052202000 | 0.467561000  | 0.949741000  |
| H  | -3.045594000 | 0.251630000  | -1.256734000 |
| H  | 0.000289000  | -1.041417000 | 2.472272000  |
| H  | 0.000137000  | 1.283380000  | 3.560306000  |
| H  | -0.000422000 | 1.972191000  | -3.137945000 |
| N  | -0.000151000 | 0.392806000  | -1.765165000 |
| O  | 0.000398000  | -2.595158000 | 0.012036000  |
| H  | -0.783416000 | -3.171449000 | -0.059049000 |
| H  | 0.784426000  | -3.171190000 | -0.058785000 |

**Os-N. H<sub>2</sub>O.T<sub>1</sub>**

Energy = -469.858201 a.u.

2 3

|   |              |             |              |
|---|--------------|-------------|--------------|
| C | -0.000772000 | 1.587141000 | 2.237464000  |
| C | -0.000517000 | 1.644508000 | -0.136591000 |
| C | -0.000049000 | 1.079492000 | -2.437586000 |
| C | -0.000545000 | 2.135463000 | -1.454439000 |
| H | -0.000908000 | 3.191411000 | -1.722695000 |
| C | -0.000236000 | 0.190005000 | 1.975818000  |
| C | -0.000896000 | 2.383051000 | 1.098882000  |

|    |              |              |              |
|----|--------------|--------------|--------------|
| H  | -0.001222000 | 3.471723000  | 1.131784000  |
| Os | 0.000112000  | -0.345670000 | 0.036573000  |
| P  | 2.483024000  | -0.260242000 | -0.002677000 |
| H  | 3.124265000  | -1.501744000 | 0.246340000  |
| H  | 3.056886000  | 0.146631000  | -1.234543000 |
| H  | 3.097494000  | 0.601597000  | 0.940576000  |
| P  | -2.482786000 | -0.261570000 | -0.003095000 |
| H  | -3.123433000 | -1.503119000 | 0.247211000  |
| H  | -3.097651000 | 0.600929000  | 0.939299000  |
| H  | -3.056854000 | 0.143776000  | -1.235366000 |
| H  | 0.000055000  | -0.480542000 | 2.842841000  |
| H  | -0.001026000 | 2.006112000  | 3.240857000  |
| H  | 0.000071000  | 1.254444000  | -3.514900000 |
| N  | 0.000295000  | -0.121259000 | -1.931981000 |
| O  | 0.000581000  | -2.595688000 | 0.126060000  |
| H  | 0.000785000  | -3.176302000 | 0.909482000  |
| H  | 0.000812000  | -3.160477000 | -0.669739000 |

**Os-N.NH<sub>3</sub>.S<sub>0</sub>**

Energy = -450.071533 a.u.

2 1

|    |              |              |              |
|----|--------------|--------------|--------------|
| C  | 0.001932000  | 1.016425000  | 2.525823000  |
| C  | 0.003065000  | 1.708259000  | 0.288288000  |
| C  | 0.002932000  | 1.762602000  | -2.020147000 |
| C  | 0.004433000  | 2.542695000  | -0.828241000 |
| H  | 0.006378000  | 3.630464000  | -0.808830000 |
| C  | -0.000286000 | -0.214863000 | 1.866482000  |
| C  | 0.003846000  | 2.098156000  | 1.642807000  |
| H  | 0.005722000  | 3.139203000  | 1.961760000  |
| Os | -0.000663000 | -0.371618000 | -0.113967000 |
| P  | 2.461372000  | -0.288458000 | -0.105638000 |
| H  | 3.185835000  | -1.508532000 | -0.023948000 |
| H  | 3.041136000  | 0.310145000  | -1.254172000 |
| H  | 3.040371000  | 0.454778000  | 0.954677000  |
| P  | -2.462491000 | -0.280150000 | -0.105401000 |
| H  | -3.190984000 | -1.497834000 | -0.023891000 |
| H  | -3.038982000 | 0.464825000  | 0.955059000  |
| H  | -3.040310000 | 0.320549000  | -1.253821000 |
| H  | -0.002003000 | -1.141008000 | 2.454482000  |
| H  | 0.002134000  | 1.120599000  | 3.607623000  |
| H  | 0.003494000  | 2.119104000  | -3.049133000 |
| N  | 0.000684000  | 0.484165000  | -1.739320000 |
| N  | -0.004411000 | -2.629496000 | -0.032006000 |
| H  | 0.810256000  | -3.050943000 | 0.422853000  |

|   |              |              |              |
|---|--------------|--------------|--------------|
| H | -0.820791000 | -3.048470000 | 0.422058000  |
| H | -0.004509000 | -3.003091000 | -0.988430000 |

**Os-N.NH<sub>3</sub>.T<sub>1</sub>**

Energy = -450.011868 a.u.

2 3

|    |              |              |              |
|----|--------------|--------------|--------------|
| C  | 0.002206000  | 1.535533000  | 2.271074000  |
| C  | 0.001604000  | 1.643547000  | -0.096816000 |
| C  | 0.000260000  | 1.129118000  | -2.411165000 |
| C  | 0.001602000  | 2.165110000  | -1.406354000 |
| H  | 0.002526000  | 3.225859000  | -1.656138000 |
| C  | 0.000716000  | 0.141678000  | 1.976952000  |
| C  | 0.002707000  | 2.359092000  | 1.153176000  |
| H  | 0.003814000  | 3.446542000  | 1.215342000  |
| Os | -0.000199000 | -0.362517000 | 0.031071000  |
| P  | 2.473141000  | -0.214891000 | -0.023501000 |
| H  | 3.185750000  | -1.426197000 | 0.184336000  |
| H  | 3.016894000  | 0.245230000  | -1.250248000 |
| H  | 3.064592000  | 0.645459000  | 0.935898000  |
| P  | -2.473456000 | -0.209958000 | -0.022358000 |
| H  | -3.188808000 | -1.419888000 | 0.184034000  |
| H  | -3.062672000 | 0.650482000  | 0.938340000  |
| H  | -3.016550000 | 0.253045000  | -1.248312000 |
| H  | 0.000113000  | -0.546755000 | 2.829712000  |
| H  | 0.002870000  | 1.928816000  | 3.284967000  |
| H  | 0.000105000  | 1.330288000  | -3.484047000 |
| N  | -0.000698000 | -0.086147000 | -1.938737000 |
| N  | -0.003702000 | -2.643981000 | 0.103842000  |
| H  | 0.807978000  | -3.052585000 | 0.575555000  |
| H  | -0.812788000 | -3.050391000 | 0.581834000  |
| H  | -0.007737000 | -3.039421000 | -0.841695000 |

**Os-N.NH<sub>2</sub>.S<sub>0</sub>**

Energy = -449.817503 a.u.

1 1

|    |              |              |              |
|----|--------------|--------------|--------------|
| C  | 0.003264000  | 1.216692000  | 2.448150000  |
| C  | 0.004351000  | 1.730868000  | 0.175842000  |
| C  | 0.003560000  | 1.589678000  | -2.128615000 |
| C  | 0.006014000  | 2.466867000  | -1.004856000 |
| H  | 0.008725000  | 3.553425000  | -1.081879000 |
| C  | -0.000067000 | -0.073833000 | 1.904373000  |
| C  | 0.005771000  | 2.234459000  | 1.491406000  |
| H  | 0.008516000  | 3.294295000  | 1.743641000  |
| Os | -0.001023000 | -0.403079000 | -0.070701000 |

|   |              |              |              |
|---|--------------|--------------|--------------|
| P | 2.414268000  | -0.380116000 | -0.091802000 |
| H | 3.095006000  | -1.624778000 | 0.023709000  |
| H | 3.026476000  | 0.147505000  | -1.259410000 |
| H | 3.068751000  | 0.366477000  | 0.923133000  |
| P | -2.416096000 | -0.369053000 | -0.091348000 |
| H | -3.102361000 | -1.610678000 | 0.024042000  |
| H | -3.067228000 | 0.380298000  | 0.923710000  |
| H | -3.026048000 | 0.161439000  | -1.258835000 |
| H | -0.002149000 | -0.925800000 | 2.585772000  |
| H | 0.003840000  | 1.403985000  | 3.519411000  |
| H | 0.004214000  | 1.905343000  | -3.172284000 |
| N | 0.000446000  | 0.316272000  | -1.817866000 |
| H | -0.830633000 | -2.945504000 | 0.133881000  |
| N | -0.005607000 | -2.355384000 | 0.041331000  |
| H | 0.816855000  | -2.949118000 | 0.133596000  |

**Os-N.NH<sup>2</sup>.T<sub>1</sub>**

Energy = -449.768633 a.u.

1 3

|    |              |              |              |
|----|--------------|--------------|--------------|
| C  | 0.001967000  | 1.403328000  | 2.318964000  |
| C  | 0.001859000  | 1.679388000  | -0.021212000 |
| C  | 0.000790000  | 1.249819000  | -2.321983000 |
| C  | 0.002142000  | 2.251612000  | -1.287475000 |
| H  | 0.003308000  | 3.319454000  | -1.505269000 |
| C  | 0.000381000  | 0.033218000  | 1.959338000  |
| C  | 0.002783000  | 2.305777000  | 1.251718000  |
| H  | 0.004012000  | 3.385873000  | 1.398237000  |
| Os | -0.000422000 | -0.414151000 | 0.001800000  |
| P  | 2.418958000  | -0.240639000 | -0.027437000 |
| H  | 3.192521000  | -1.404358000 | 0.226417000  |
| H  | 2.991832000  | 0.205899000  | -1.248205000 |
| H  | 2.994858000  | 0.671465000  | 0.895528000  |
| P  | -2.419481000 | -0.235897000 | -0.026684000 |
| H  | -3.195047000 | -1.398305000 | 0.227046000  |
| H  | -2.993610000 | 0.677004000  | 0.896598000  |
| H  | -2.991794000 | 0.211963000  | -1.247232000 |
| H  | -0.000266000 | -0.687298000 | 2.786773000  |
| H  | 0.002482000  | 1.738178000  | 3.354580000  |
| H  | 0.000741000  | 1.497138000  | -3.386192000 |
| N  | -0.000366000 | 0.003219000  | -1.926264000 |
| H  | -0.003558000 | -3.027328000 | -0.795795000 |
| N  | -0.002752000 | -2.441523000 | 0.041346000  |
| H  | -0.003266000 | -3.036914000 | 0.870831000  |

**Os-N.I.S<sub>0</sub>**

Energy = -405.273057 a.u.

1 1

|    |              |              |              |
|----|--------------|--------------|--------------|
| C  | -1.861462000 | -0.001319000 | 2.476985000  |
| C  | -2.405545000 | 0.000158000  | 0.210526000  |
| C  | -2.339543000 | 0.001518000  | -2.094761000 |
| C  | -3.177255000 | 0.000835000  | -0.948245000 |
| H  | -4.264762000 | 0.000946000  | -0.984500000 |
| C  | -0.589824000 | -0.001070000 | 1.892051000  |
| C  | -2.886765000 | -0.000587000 | 1.535032000  |
| H  | -3.945591000 | -0.000679000 | 1.788268000  |
| Os | -0.308556000 | 0.000093000  | -0.080980000 |
| P  | -0.162488000 | 2.426988000  | -0.113653000 |
| H  | 0.612665000  | 3.031365000  | 0.906757000  |
| H  | 0.431024000  | 2.972534000  | -1.280279000 |
| H  | -1.364342000 | 3.184232000  | -0.036742000 |
| P  | -0.163878000 | -2.426724000 | -0.115753000 |
| H  | 0.612082000  | -3.032249000 | 0.903366000  |
| H  | -1.366244000 | -3.183043000 | -0.037774000 |
| H  | 0.427711000  | -2.972227000 | -1.283389000 |
| H  | 0.294363000  | -0.001655000 | 2.532658000  |
| H  | -2.024707000 | -0.002045000 | 3.551439000  |
| H  | -2.656125000 | 0.002199000  | -3.136396000 |
| N  | -1.068357000 | 0.001248000  | -1.775499000 |
| I  | 2.426991000  | -0.000309000 | 0.012663000  |

**Os-N.I.T<sub>1</sub>**

Energy = -405.224712 a.u.

1 3

|    |              |              |              |
|----|--------------|--------------|--------------|
| C  | -1.956410000 | -0.000894000 | 2.377788000  |
| C  | -2.317462000 | -0.000157000 | 0.044453000  |
| C  | -1.989418000 | 0.000741000  | -2.278969000 |
| C  | -2.940033000 | 0.000253000  | -1.197172000 |
| H  | -4.018098000 | 0.000224000  | -1.355798000 |
| C  | -0.601633000 | -0.000555000 | 1.961045000  |
| C  | -2.891569000 | -0.000673000 | 1.344114000  |
| H  | -3.966912000 | -0.000771000 | 1.519314000  |
| Os | -0.244380000 | -0.000042000 | -0.014995000 |
| P  | -0.470252000 | 2.422493000  | -0.044603000 |
| H  | 0.671267000  | 3.233154000  | 0.183395000  |
| H  | -0.963926000 | 2.966495000  | -1.259605000 |
| H  | -1.382613000 | 2.963292000  | 0.899038000  |
| P  | -0.469256000 | -2.422755000 | -0.045779000 |
| H  | 0.672679000  | -3.232823000 | 0.182213000  |



|   |              |              |              |    |              |              |              |
|---|--------------|--------------|--------------|----|--------------|--------------|--------------|
| H | -1.381545000 | -2.964478000 | 0.897408000  | C  | 0.006170000  | 2.200031000  | 1.417960000  |
| H | -0.962316000 | -2.966729000 | -1.261052000 | H  | 0.008783000  | 3.267557000  | 1.637655000  |
| H | 0.161865000  | -0.000438000 | 2.745630000  | Os | -0.000971000 | -0.411145000 | -0.017818000 |
| H | -2.253043000 | -0.001230000 | 3.424617000  | P  | 2.432731000  | -0.258321000 | -0.093489000 |
| H | -2.289388000 | 0.001073000  | -3.329498000 | H  | 3.141943000  | -1.487298000 | -0.080747000 |
| N | -0.728290000 | 0.000591000  | -1.941327000 | H  | 2.964800000  | 0.373141000  | -1.247464000 |
| I | 2.446316000  | 0.000243000  | -0.001294000 | H  | 3.073735000  | 0.457446000  | 0.950757000  |

**Os-N.OH.S<sub>0</sub>**

Energy = -469.681929 a.u.

1 1

|    |              |              |              |
|----|--------------|--------------|--------------|
| C  | -0.399646000 | 0.978024000  | 2.511738000  |
| C  | -0.679145000 | 1.572310000  | 0.273817000  |
| C  | -0.704087000 | 1.597900000  | -2.028748000 |
| C  | -1.014110000 | 2.327978000  | -0.851226000 |
| H  | -1.444603000 | 3.327783000  | -0.843476000 |
| C  | 0.090248000  | -0.166713000 | 1.877503000  |
| C  | -0.833216000 | 1.960626000  | 1.618990000  |
| H  | -1.239354000 | 2.921526000  | 1.931589000  |
| Os | 0.143720000  | -0.347545000 | -0.109620000 |
| P  | 2.436813000  | 0.467673000  | -0.123153000 |
| H  | 3.397154000  | -0.540359000 | 0.147789000  |
| H  | 2.917099000  | 1.024089000  | -1.337765000 |
| H  | 2.795035000  | 1.483107000  | 0.801908000  |
| P  | -2.093199000 | -1.280150000 | -0.095090000 |
| H  | -2.226439000 | -2.695844000 | -0.036441000 |
| H  | -2.947217000 | -0.895047000 | 0.971814000  |
| H  | -2.904796000 | -0.985003000 | -1.222491000 |
| H  | 0.474221000  | -0.997224000 | 2.473260000  |
| H  | -0.432011000 | 1.090586000  | 3.592480000  |
| H  | -0.850714000 | 1.932014000  | -3.054778000 |
| N  | -0.192572000 | 0.415345000  | -1.771451000 |
| O  | 1.054593000  | -2.086058000 | 0.011456000  |
| H  | 0.535703000  | -2.904740000 | 0.076917000  |

**Os-N.OH.T<sub>1</sub>**

Energy = -469.624408 a.u.

1 3

|   |             |              |              |
|---|-------------|--------------|--------------|
| C | 0.004518000 | 1.227744000  | 2.421571000  |
| C | 0.004049000 | 1.666060000  | 0.101165000  |
| C | 0.001663000 | 1.399028000  | -2.228914000 |
| C | 0.004871000 | 2.325644000  | -1.122175000 |
| H | 0.007375000 | 3.407099000  | -1.260490000 |
| C | 0.000796000 | -0.114526000 | 1.969289000  |

|   |              |              |              |
|---|--------------|--------------|--------------|
| H | -3.147604000 | -1.475186000 | -0.080776000 |
| H | -3.072010000 | 0.466877000  | 0.955272000  |
| H | -2.964721000 | 0.387371000  | -1.243174000 |
| H | -0.001264000 | -0.891106000 | 2.743763000  |
| H | 0.005844000  | 1.492146000  | 3.477119000  |
| H | 0.001580000  | 1.728508000  | -3.270917000 |
| N | -0.001302000 | 0.127213000  | -1.932784000 |
| O | -0.005192000 | -2.382272000 | -0.120919000 |
| H | -0.005534000 | -2.930964000 | 0.684561000  |

**Os-N.Br.S<sub>0</sub>**

Energy = -407.057486 a.u.

1 1

|    |              |              |              |
|----|--------------|--------------|--------------|
| C  | -1.544507000 | -0.137973000 | 2.489421000  |
| C  | -2.134026000 | 0.056405000  | 0.241823000  |
| C  | -2.114949000 | 0.252650000  | -2.054484000 |
| C  | -2.930161000 | 0.184416000  | -0.894814000 |
| H  | -4.017210000 | 0.229661000  | -0.904855000 |
| C  | -0.285855000 | -0.128566000 | 1.878786000  |
| C  | -2.588213000 | -0.035288000 | 1.572784000  |
| H  | -3.641193000 | -0.024535000 | 1.849001000  |
| Os | -0.048507000 | 0.005991000  | -0.094389000 |
| P  | 0.239121000  | 2.422750000  | 0.023646000  |
| H  | 0.994860000  | 2.913077000  | 1.117133000  |
| H  | 0.931299000  | 2.987200000  | -1.077544000 |
| H  | -0.915207000 | 3.250898000  | 0.082793000  |
| P  | -0.082638000 | -2.418836000 | -0.248291000 |
| H  | 1.119652000  | -3.080284000 | 0.108710000  |
| H  | -1.042065000 | -3.114252000 | 0.535651000  |
| H  | -0.339354000 | -2.958322000 | -1.536728000 |
| H  | 0.614594000  | -0.201639000 | 2.492160000  |
| H  | -1.686610000 | -0.215269000 | 3.564088000  |
| H  | -2.448957000 | 0.352843000  | -3.085673000 |
| N  | -0.838817000 | 0.175651000  | -1.762036000 |
| Br | 2.492214000  | -0.086651000 | 0.009476000  |

**Os-N.Br.T<sub>1</sub>**

Energy = -407.004438 a.u.

1 3

|    |              |              |              |
|----|--------------|--------------|--------------|
| C  | 1.671873000  | -0.000291000 | 2.395195000  |
| C  | 2.057706000  | -0.000055000 | 0.064127000  |
| C  | 1.754272000  | 0.000221000  | -2.265680000 |
| C  | 2.693589000  | 0.000083000  | -1.171323000 |
| H  | 3.773348000  | 0.000071000  | -1.319194000 |
| C  | 0.321947000  | -0.000227000 | 1.962355000  |
| C  | 2.618174000  | -0.000223000 | 1.371831000  |
| H  | 3.691446000  | -0.000254000 | 1.559498000  |
| Os | -0.008702000 | 0.000001000  | -0.016230000 |
| P  | 0.193745000  | -2.430895000 | -0.059982000 |
| H  | -0.990988000 | -3.195505000 | 0.090653000  |
| H  | 0.739653000  | -2.969431000 | -1.254319000 |
| H  | 1.034264000  | -3.006734000 | 0.927938000  |
| P  | 0.193953000  | 2.430887000  | -0.059594000 |
| H  | -0.990798000 | 3.195575000  | 0.090505000  |
| H  | 1.034021000  | 3.006576000  | 0.928798000  |
| H  | 0.740505000  | 2.969481000  | -1.253609000 |
| H  | -0.455846000 | -0.000246000 | 2.732653000  |
| H  | 1.956412000  | -0.000384000 | 3.445293000  |
| H  | 2.068908000  | 0.000304000  | -3.312011000 |
| N  | 0.489399000  | 0.000175000  | -1.946018000 |
| Br | -2.511033000 | 0.000066000  | -0.003599000 |

**Os-N.F.S<sub>0</sub>**

Energy = -493.714786 a.u.

1 1

|    |              |              |              |
|----|--------------|--------------|--------------|
| C  | -0.000023000 | 0.893213000  | 2.566237000  |
| C  | -0.000033000 | 1.691696000  | 0.370113000  |
| C  | -0.000039000 | 1.896053000  | -1.919900000 |
| C  | -0.000047000 | 2.601538000  | -0.693163000 |
| H  | -0.000068000 | 3.685570000  | -0.600905000 |
| C  | 0.000010000  | -0.301729000 | 1.846934000  |
| C  | -0.000044000 | 2.018881000  | 1.740091000  |
| H  | -0.000066000 | 3.042101000  | 2.111986000  |
| Os | 0.000007000  | -0.346258000 | -0.144123000 |
| P  | 2.430246000  | -0.505214000 | -0.133820000 |
| H  | 2.914352000  | -1.825555000 | 0.053859000  |
| H  | 3.113907000  | -0.101546000 | -1.310724000 |
| H  | 3.140928000  | 0.215154000  | 0.861608000  |
| P  | -2.430225000 | -0.505303000 | -0.133823000 |
| H  | -2.914284000 | -1.825677000 | 0.053750000  |

|   |              |              |              |
|---|--------------|--------------|--------------|
| H | -3.140926000 | 0.214958000  | 0.861670000  |
| H | -3.113909000 | -0.101560000 | -1.310688000 |
| H | 0.000026000  | -1.269276000 | 2.354933000  |
| H | -0.000027000 | 0.939799000  | 3.651953000  |
| H | -0.000046000 | 2.316664000  | -2.923349000 |
| N | -0.000011000 | 0.593742000  | -1.728486000 |
| F | 0.000044000  | -2.307930000 | -0.022064000 |

**Os-N.F.T<sub>1</sub>**

Energy = -493.651870 a.u.

1 3

|    |              |              |              |
|----|--------------|--------------|--------------|
| C  | -0.001325000 | 1.323061000  | 2.382294000  |
| C  | -0.002958000 | 1.666767000  | 0.041184000  |
| C  | -0.003287000 | 1.324789000  | -2.287075000 |
| C  | -0.004589000 | 2.285536000  | -1.205814000 |
| H  | -0.006502000 | 3.362497000  | -1.375750000 |
| C  | 0.000951000  | -0.032910000 | 1.972061000  |
| C  | -0.003419000 | 2.252766000  | 1.341956000  |
| H  | -0.005275000 | 3.328599000  | 1.515687000  |
| Os | 0.000728000  | -0.384411000 | -0.003126000 |
| P  | 2.450916000  | -0.334360000 | -0.077191000 |
| H  | 3.042922000  | -1.620483000 | 0.005435000  |
| H  | 3.027835000  | 0.196026000  | -1.259595000 |
| H  | 3.134363000  | 0.382780000  | 0.938052000  |
| P  | -2.449652000 | -0.341344000 | -0.075624000 |
| H  | -3.038339000 | -1.628989000 | 0.006944000  |
| H  | -3.134687000 | 0.373901000  | 0.939887000  |
| H  | -3.028070000 | 0.187785000  | -1.257852000 |
| H  | 0.002643000  | -0.805384000 | 2.748483000  |
| H  | -0.001442000 | 1.625483000  | 3.427256000  |
| H  | -0.004320000 | 1.626992000  | -3.337295000 |
| N  | -0.000984000 | 0.064777000  | -1.952917000 |
| F  | 0.003473000  | -2.339101000 | 0.042366000  |

**Os-N.CO.S<sub>0</sub>**

Energy = -506.798069 a.u.

2 1

|   |              |              |              |
|---|--------------|--------------|--------------|
| C | 1.143568000  | -0.000733000 | 2.508444000  |
| C | 1.826788000  | -0.000758000 | 0.262464000  |
| C | 1.834524000  | -0.000458000 | -2.049204000 |
| C | 2.639415000  | -0.000937000 | -0.866670000 |
| H | 3.727719000  | -0.001389000 | -0.872214000 |
| C | -0.102480000 | -0.000171000 | 1.872647000  |
| C | 2.217443000  | -0.001067000 | 1.616348000  |

H 3.259788000 -0.001521000 1.933254000  
 Os -0.288603000 0.000151000 -0.108664000  
 P -0.184677000 -2.476861000 -0.087904000  
 H -1.397063000 -3.194344000 0.076840000  
 H 0.350473000 -3.048801000 -1.270685000  
 H 0.633897000 -3.026625000 0.931026000  
 P -0.182443000 2.477044000 -0.087500000  
 H -1.394413000 3.195637000 0.075452000  
 H 0.635115000 3.026059000 0.932654000  
 H 0.355022000 3.048605000 -1.269417000  
 H -1.010671000 0.000153000 2.487181000  
 H 1.261860000 -0.000855000 3.589046000  
 H 2.171037000 -0.000443000 -3.086265000  
 N 0.566665000 0.000016000 -1.746153000  
 C -2.387295000 0.000840000 -0.032975000  
 O -3.518823000 0.001114000 -0.035079000

**Os-N. CO.T<sub>1</sub>**

Energy = -506.745154 a.u.

2 3

C 1.488624000 -0.001243000 2.366923000  
 C 1.773493000 -0.000172000 0.041144000  
 C 1.503637000 0.000871000 -2.338228000  
 C 2.435939000 0.000354000 -1.230317000  
 H 3.516473000 0.000509000 -1.376747000  
 C 0.102254000 -0.000876000 1.941686000  
 C 2.406270000 -0.000806000 1.334284000  
 H 3.483877000 -0.000985000 1.488639000  
 Os -0.253516000 0.000011000 0.005206000  
 P -0.257145000 -2.480891000 -0.040721000  
 H -1.473980000 -3.110057000 0.326565000  
 H 0.015032000 -3.057086000 -1.308305000  
 H 0.684026000 -3.119727000 0.806935000  
 P -0.256632000 2.481030000 -0.039078000  
 H -1.474295000 3.110265000 0.325339000  
 H 0.682492000 3.119310000 0.811258000  
 H 0.018908000 3.057750000 -1.305696000  
 H -0.651772000 -0.001082000 2.735624000  
 H 1.775717000 -0.001843000 3.416357000  
 H 1.804813000 0.001332000 -3.388286000  
 N 0.259992000 0.000889000 -1.976839000  
 C -2.314115000 0.000185000 -0.029287000  
 O -3.450497000 0.000327000 -0.051211000

**Os-N.PF<sub>3</sub>.S<sub>0</sub>**

Energy = -699.601674 a.u.

2 1

C 1.729227000 0.004863000 2.463521000  
 C 2.294299000 0.000703000 0.188580000  
 C 2.193125000 -0.003021000 -2.125291000  
 C 3.048298000 -0.001211000 -0.979410000  
 H 4.134988000 -0.001230000 -1.036984000  
 C 0.459440000 0.003564000 1.877866000  
 C 2.758102000 0.003096000 1.520326000  
 H 3.815680000 0.003605000 1.780684000  
 Os 0.181677000 0.000080000 -0.086784000  
 P 0.296151000 -2.473944000 -0.066533000  
 H -0.892744000 -3.217564000 0.147975000  
 H 0.788349000 -3.038783000 -1.271446000  
 H 1.166809000 -3.013056000 0.914264000  
 P 0.292168000 2.474203000 -0.072325000  
 H -0.893890000 3.215346000 0.165127000  
 H 1.180293000 3.015618000 0.891407000  
 H 0.759792000 3.039710000 -1.286667000  
 H -0.432166000 0.004431000 2.519122000  
 H 1.895681000 0.006894000 3.537670000  
 H 2.486505000 -0.004721000 -3.175038000  
 N 0.939337000 -0.002298000 -1.766406000  
 P -2.358533000 -0.001067000 -0.018088000  
 F -3.103170000 1.226502000 -0.698150000  
 F -2.987466000 0.000492000 1.443838000  
 F -3.102017000 -1.231002000 -0.695137000

**Os-N. PF<sub>3</sub>.T<sub>1</sub>**

Energy = -699.547410 a.u.

2 3

C 1.982678000 -0.001168000 2.348310000  
 C 2.210743000 -0.000176000 0.002454000  
 C 1.875885000 0.000869000 -2.363168000  
 C 2.834183000 0.000305000 -1.282981000  
 H 3.910858000 0.000252000 -1.453858000  
 C 0.595028000 -0.000793000 1.959108000  
 C 2.868556000 -0.000844000 1.289612000  
 H 3.950614000 -0.001022000 1.410378000  
 Os 0.209841000 0.000091000 0.008277000  
 P 0.244623000 -2.483954000 -0.029280000  
 H -0.970322000 -3.155345000 0.262380000  
 H 0.611943000 -3.051925000 -1.276482000

|   |              |              |              |    |              |              |              |
|---|--------------|--------------|--------------|----|--------------|--------------|--------------|
| H | 1.150204000  | -3.090029000 | 0.878810000  | P  | 0.074141000  | 2.428979000  | -0.007702000 |
| P | 0.244914000  | 2.484143000  | -0.027767000 | C  | -0.195687000 | 0.000955000  | -1.997918000 |
| H | -0.970382000 | 3.155296000  | 0.262995000  | C  | -2.314066000 | 0.000787000  | -1.342311000 |
| H | 1.149516000  | 3.089880000  | 0.881524000  | H  | -3.383450000 | 0.000939000  | -1.551423000 |
| H | 0.613430000  | 3.052760000  | -1.274319000 | C  | -1.759553000 | 0.000104000  | -0.050136000 |
| H | -0.143793000 | -0.000991000 | 2.767720000  | C  | -2.440423000 | -0.000470000 | 1.185027000  |
| H | 2.302878000  | -0.001675000 | 3.387753000  | H  | -3.527550000 | -0.000468000 | 1.263417000  |
| H | 2.147300000  | 0.001273000  | -3.420757000 | Cl | 2.628714000  | 0.000361000  | 0.045123000  |
| N | 0.640074000  | 0.000836000  | -1.962769000 | H  | -0.519411000 | 3.011400000  | -1.157585000 |
| P | -2.290601000 | 0.000042000  | -0.003401000 | H  | -0.709286000 | 2.988317000  | 1.034771000  |
| F | -3.006769000 | 1.234871000  | -0.711894000 | H  | 1.281904000  | 3.165066000  | 0.102105000  |
| F | -3.027891000 | -0.000656000 | 1.410408000  | C  | -0.233211000 | -0.000974000 | 1.998094000  |
| F | -3.006134000 | -1.234648000 | -0.712859000 | C  | -1.594486000 | -0.001059000 | 2.309313000  |

#### Os-N.iso1.S<sub>0</sub>

Energy = -408.815829 a.u.

1 1

|    |              |              |              |
|----|--------------|--------------|--------------|
| Os | 0.239018000  | -0.000083000 | 0.020432000  |
| P  | 0.380151000  | 2.424898000  | 0.042102000  |
| C  | -0.323623000 | -0.000086000 | -1.882535000 |
| C  | -2.427317000 | 0.000707000  | -1.393696000 |
| H  | -3.486919000 | 0.000999000  | -1.639142000 |
| C  | -1.887375000 | 0.000618000  | -0.110215000 |
| C  | -2.644158000 | 0.000957000  | 1.068273000  |
| H  | -3.732463000 | 0.001315000  | 1.090919000  |
| Cl | 2.622184000  | -0.000852000 | 0.025842000  |
| H  | 0.986461000  | 3.027010000  | -1.090570000 |
| H  | -0.816728000 | 3.180364000  | 0.155738000  |
| H  | 1.161606000  | 2.974256000  | 1.090988000  |
| C  | -0.496759000 | 0.000356000  | 1.853362000  |
| C  | -1.829727000 | 0.000824000  | 2.211590000  |
| H  | 0.325886000  | 0.000169000  | 2.581797000  |
| P  | 0.378093000  | -2.425120000 | 0.042428000  |
| H  | 0.984930000  | -3.027997000 | -1.089554000 |
| H  | 1.158027000  | -2.975054000 | 1.092149000  |
| H  | -0.819592000 | -3.179454000 | 0.155055000  |
| H  | -2.188825000 | 0.001059000  | 3.236699000  |
| H  | 0.572729000  | -0.000456000 | -2.522203000 |
| N  | -1.515357000 | 0.000238000  | -2.400378000 |

#### Os-N. iso1.T<sub>1</sub>

Energy = -408.771424 a.u.

1 3

|    |             |              |             |
|----|-------------|--------------|-------------|
| Os | 0.293014000 | -0.000094000 | 0.008438000 |
|----|-------------|--------------|-------------|

|    |              |              |              |
|----|--------------|--------------|--------------|
| P  | 0.074141000  | 2.428979000  | -0.007702000 |
| C  | -0.195687000 | 0.000955000  | -1.997918000 |
| C  | -2.314066000 | 0.000787000  | -1.342311000 |
| H  | -3.383450000 | 0.000939000  | -1.551423000 |
| C  | -1.759553000 | 0.000104000  | -0.050136000 |
| C  | -2.440423000 | -0.000470000 | 1.185027000  |
| H  | -3.527550000 | -0.000468000 | 1.263417000  |
| Cl | 2.628714000  | 0.000361000  | 0.045123000  |
| H  | -0.519411000 | 3.011400000  | -1.157585000 |
| H  | -0.709286000 | 2.988317000  | 1.034771000  |
| H  | 1.281904000  | 3.165066000  | 0.102105000  |
| C  | -0.233211000 | -0.000974000 | 1.998094000  |
| C  | -1.594486000 | -0.001059000 | 2.309313000  |
| H  | 0.498746000  | -0.001394000 | 2.811679000  |
| P  | 0.074285000  | -2.429134000 | -0.009488000 |
| H  | 1.282225000  | -3.164895000 | 0.100612000  |
| H  | -0.709564000 | -2.989243000 | 1.032250000  |
| H  | -0.518465000 | -3.011209000 | -1.159967000 |
| H  | -1.981317000 | -0.001505000 | 3.326151000  |
| H  | 0.554004000  | 0.001321000  | -2.799801000 |
| N  | -1.460982000 | 0.001277000  | -2.395020000 |

#### Os-N.iso2.S<sub>0</sub>

Energy = -408.808825 a.u.

1 1

|    |              |              |              |
|----|--------------|--------------|--------------|
| Os | -0.247063000 | 0.000014000  | -0.072957000 |
| P  | -0.360728000 | 2.431630000  | -0.053643000 |
| C  | 0.131733000  | 0.000272000  | 1.871222000  |
| C  | 1.406720000  | 0.000274000  | 2.389713000  |
| C  | 1.883409000  | -0.000026000 | 0.246638000  |
| C  | 2.736266000  | -0.000157000 | -0.883037000 |
| H  | 3.819311000  | -0.000241000 | -0.791659000 |
| Cl | -2.627308000 | -0.000044000 | -0.044830000 |
| H  | -1.109397000 | 2.998851000  | 1.008749000  |
| H  | 0.850006000  | 3.169260000  | 0.022265000  |
| H  | -0.984083000 | 3.032622000  | -1.178436000 |
| C  | 0.654127000  | -0.000118000 | -1.805657000 |
| C  | 2.015023000  | -0.000212000 | -2.074857000 |
| H  | -0.126803000 | -0.000154000 | -2.583760000 |
| P  | -0.360752000 | -2.431694000 | -0.053304000 |
| H  | -1.107742000 | -2.998759000 | 1.010353000  |
| H  | -0.985988000 | -3.032720000 | -1.177030000 |
| H  | 0.850041000  | -3.169418000 | 0.020723000  |
| H  | 1.654385000  | 0.000450000  | 3.447118000  |

H 2.445548000 -0.000302000 -3.071622000  
H -0.779260000 0.000375000 2.475067000  
N 2.396224000 0.000064000 1.466452000

**Os-N. iso2.T<sub>1</sub>**

Energy = -408.766672 a.u.

1 3

Os -0.312108000 0.000549000 -0.013587000  
P -0.019285000 2.421601000 -0.013952000  
C 0.099006000 -0.000401000 1.985216000  
C 1.459961000 -0.002112000 2.317978000  
C 1.756012000 -0.001919000 0.114038000  
C 2.464858000 -0.002409000 -1.113232000  
H 3.552897000 -0.003570000 -1.142945000  
Cl -2.646643000 0.001392000 -0.055795000  
H 0.676552000 2.965076000 1.096274000  
H 0.694145000 2.969184000 -1.110805000  
H -1.212824000 3.188966000 -0.020379000  
C 0.272444000 0.000209000 -1.982106000  
C 1.645611000 -0.001256000 -2.252131000  
H -0.434978000 0.001070000 -2.817175000  
P -0.024232000 -2.421107000 -0.014732000  
H -1.219268000 -3.186119000 -0.021242000  
H 0.688147000 -2.969871000 -1.111676000  
H 0.670568000 -2.966014000 1.095434000  
H 1.844465000 -0.002803000 3.335280000  
H 2.057925000 -0.001546000 -3.258790000  
H -0.648621000 0.000179000 2.783218000  
N 2.358504000 -0.002858000 1.309374000

H -0.000161000 -0.717619000 2.536079000  
H -0.000106000 1.609132000 3.589592000  
H 0.000138000 2.249497000 -3.093062000  
N 0.000066000 0.661836000 -1.723511000  
Cl -0.000054000 -2.505639000 0.167283000  
C -3.000577000 -1.259379000 -1.586365000  
H -4.090408000 -1.365009000 -1.596614000  
H -2.676515000 -0.745833000 -2.495947000  
H -2.536638000 -2.248650000 -1.556090000  
C -3.424566000 1.284951000 -0.198773000  
H -4.495243000 1.069732000 -0.279191000  
H -3.246615000 1.883274000 0.699118000  
H -3.111418000 1.861325000 -1.073675000  
C -3.193014000 -1.193540000 1.336913000  
H -4.268549000 -1.332851000 1.186487000  
H -2.709156000 -2.168590000 1.435046000  
H -3.032138000 -0.618936000 2.253828000  
C 3.424603000 1.284849000 -0.199286000  
H 4.495282000 1.069542000 -0.279437000  
H 3.111620000 1.860807000 -1.074521000  
H 3.246531000 1.883609000 0.698288000  
C 3.000534000 -1.259861000 -1.586041000  
H 4.090335000 -1.365813000 -1.596097000  
H 2.536298000 -2.248989000 -1.555691000  
H 2.676769000 -0.746349000 -2.495750000  
C 3.193051000 -1.193116000 1.337237000  
H 2.709615000 -2.168379000 1.435340000  
H 4.268688000 -1.331947000 1.187091000  
H 3.031684000 -0.618512000 2.254063000

**PMe<sub>3</sub>.Os-N.S<sub>0</sub>**

Energy = -644.815633 a.u.

1 1

C -0.000050000 1.450268000 2.514445000  
C 0.000035000 1.984885000 0.248649000  
C 0.000117000 1.937387000 -2.050525000  
C 0.000021000 2.768290000 -0.907250000  
H 0.000010000 3.856020000 -0.934075000  
C -0.000077000 0.182943000 1.917080000  
C 0.000024000 2.472941000 1.572408000  
H 0.000032000 3.533160000 1.819728000  
Os -0.000001000 -0.094311000 -0.041060000  
P 2.465843000 -0.294411000 -0.103778000  
P -2.465850000 -0.294369000 -0.103833000

**PMe<sub>3</sub>.Os-N.T<sub>1</sub>**

Energy = -644.760426 a.u.

1 3

C 0.000328000 1.554027000 2.422988000  
C -0.000057000 1.902943000 0.090495000  
C -0.000330000 1.589499000 -2.236152000  
C -0.000168000 2.534010000 -1.145128000  
H -0.000161000 3.613822000 -1.297006000  
C 0.000304000 0.199079000 1.992332000  
C 0.000119000 2.485806000 1.391378000  
H 0.000077000 3.562136000 1.562242000  
Os -0.000007000 -0.148702000 0.033206000  
P 2.493227000 -0.195495000 -0.077732000  
P -2.493256000 -0.195577000 -0.077557000

|    |              |              |              |    |              |              |              |
|----|--------------|--------------|--------------|----|--------------|--------------|--------------|
| H  | 0.000448000  | -0.578133000 | 2.764633000  | H  | -0.000037000 | 1.677938000  | 3.579269000  |
| H  | 0.000505000  | 1.844621000  | 3.471642000  | H  | 0.000044000  | 2.268582000  | -3.110038000 |
| H  | -0.000434000 | 1.903365000  | -3.283769000 | N  | 0.000002000  | 0.653256000  | -1.743048000 |
| N  | -0.000290000 | 0.326299000  | -1.912961000 | Cl | -0.000009000 | -2.594922000 | 0.142982000  |
| Cl | 0.000156000  | -2.534670000 | 0.109117000  | C  | -3.084525000 | -1.189263000 | -1.582722000 |
| C  | -3.056863000 | -1.128258000 | -1.568342000 | H  | -4.176629000 | -1.279681000 | -1.565307000 |
| H  | -4.150865000 | -1.164533000 | -1.598645000 | H  | -2.774459000 | -0.648577000 | -2.481874000 |
| H  | -2.677087000 | -0.641162000 | -2.470042000 | H  | -2.631007000 | -2.184405000 | -1.603822000 |
| H  | -2.655296000 | -2.144178000 | -1.527512000 | C  | -3.440783000 | 1.287866000  | -0.101675000 |
| C  | -3.367416000 | 1.430867000  | -0.167049000 | H  | -4.515495000 | 1.082913000  | -0.167761000 |
| H  | -4.447847000 | 1.263886000  | -0.228370000 | H  | -3.231470000 | 1.850941000  | 0.812574000  |
| H  | -3.146798000 | 2.024695000  | 0.724166000  | H  | -3.132896000 | 1.897411000  | -0.956321000 |
| H  | -3.040910000 | 1.983081000  | -1.052067000 | C  | -3.208688000 | -1.236535000 | 1.318665000  |
| C  | -3.266371000 | -1.066147000 | 1.357756000  | H  | -4.288242000 | -1.359040000 | 1.175784000  |
| H  | -4.346846000 | -1.156621000 | 1.204170000  | H  | -2.727563000 | -2.216880000 | 1.373983000  |
| H  | -2.827387000 | -2.062730000 | 1.453943000  | H  | -3.024142000 | -0.701825000 | 2.255264000  |
| H  | -3.079589000 | -0.504806000 | 2.277673000  | C  | 3.440785000  | 1.287851000  | -0.101652000 |
| C  | 3.367348000  | 1.430980000  | -0.167004000 | H  | 4.515497000  | 1.082896000  | -0.167740000 |
| H  | 4.447742000  | 1.264030000  | -0.229007000 | H  | 3.132899000  | 1.897401000  | -0.956295000 |
| H  | 3.040332000  | 1.983609000  | -1.051573000 | H  | 3.231475000  | 1.850923000  | 0.812600000  |
| H  | 3.147220000  | 2.024385000  | 0.724616000  | C  | 3.084528000  | -1.189276000 | -1.582703000 |
| C  | 3.056680000  | -1.127953000 | -1.568719000 | H  | 4.176632000  | -1.279700000 | -1.565281000 |
| H  | 4.150686000  | -1.163648000 | -1.599535000 | H  | 2.631004000  | -2.184417000 | -1.603806000 |
| H  | 2.655674000  | -2.144084000 | -1.527591000 | H  | 2.774470000  | -0.648588000 | -2.481856000 |
| H  | 2.676215000  | -0.641165000 | -2.470297000 | C  | 3.208674000  | -1.236550000 | 1.318685000  |
| C  | 3.266485000  | -1.066339000 | 1.357336000  | H  | 2.727543000  | -2.216892000 | 1.374002000  |
| H  | 2.827310000  | -2.062836000 | 1.453541000  | H  | 4.288228000  | -1.359061000 | 1.175810000  |
| H  | 4.346901000  | -1.157043000 | 1.203474000  | H  | 3.024126000  | -0.701839000 | 2.255284000  |
| H  | 3.080070000  | -0.505029000 | 2.277346000  | Re | -0.000001000 | -0.097969000 | -0.054023000 |

**PMe<sub>3</sub>.Re-N.S<sub>0</sub>**

Energy = -633.072986 a.u.

O 1

|   |              |              |              |
|---|--------------|--------------|--------------|
| C | -0.000033000 | 1.492483000  | 2.505526000  |
| C | 0.000006000  | 1.992071000  | 0.233174000  |
| C | 0.000044000  | 1.949597000  | -2.067821000 |
| C | 0.000066000  | 2.777565000  | -0.939756000 |
| H | 0.000085000  | 3.867316000  | -0.972680000 |
| C | -0.000012000 | 0.209795000  | 1.928466000  |
| C | -0.000031000 | 2.504955000  | 1.547807000  |
| H | -0.000027000 | 3.569571000  | 1.785004000  |
| P | 2.457147000  | -0.287025000 | -0.086117000 |
| P | -2.457149000 | -0.287013000 | -0.086134000 |
| H | 0.000000000  | -0.669241000 | 2.583360000  |

**PMe<sub>3</sub>.Re-N.T<sub>1</sub>**

Energy = -633.018292 a.u.

O 3

|   |              |              |              |
|---|--------------|--------------|--------------|
| C | 0.000004000  | 1.429925000  | 2.488902000  |
| C | -0.000006000 | 1.948167000  | 0.172825000  |
| C | -0.000001000 | 1.802076000  | -2.160056000 |
| C | -0.000046000 | 2.678456000  | -1.039546000 |
| H | -0.000078000 | 3.765784000  | -1.119077000 |
| C | 0.000002000  | 0.155196000  | 1.995087000  |
| C | -0.000008000 | 2.451908000  | 1.477332000  |
| H | -0.000026000 | 3.517427000  | 1.711809000  |
| P | 2.484674000  | -0.201917000 | -0.030983000 |
| P | -2.484670000 | -0.201931000 | -0.030980000 |
| H | -0.000013000 | -0.712225000 | 2.662033000  |

|    |              |              |              |    |              |              |              |
|----|--------------|--------------|--------------|----|--------------|--------------|--------------|
| H  | -0.00004000  | 1.671838000  | 3.552716000  | H  | -3.192831000 | -2.258295000 | 0.000000000  |
| H  | -0.000019000 | 2.119231000  | -3.205250000 | H  | -0.331900000 | 3.814074000  | 0.000000000  |
| N  | -0.000005000 | 0.531011000  | -1.840306000 | N  | 0.335691000  | 1.838440000  | 0.000000000  |
| Cl | 0.000011000  | -2.610166000 | 0.023291000  | Cl | 2.050456000  | -1.475065000 | 0.000000000  |
| C  | -3.220720000 | -0.963068000 | -1.555601000 | C  | 1.934997000  | 0.675257000  | -2.981215000 |
| H  | -4.315699000 | -0.964559000 | -1.509492000 | H  | 2.041483000  | 0.631833000  | -4.070408000 |
| H  | -2.886813000 | -0.398349000 | -2.430674000 | H  | 1.986259000  | 1.716965000  | -2.652118000 |
| H  | -2.855706000 | -1.990116000 | -1.649058000 | H  | 2.747286000  | 0.116614000  | -2.509351000 |
| C  | -3.334873000 | 1.439950000  | 0.090441000  | C  | -0.948219000 | 0.865195000  | -3.448844000 |
| H  | -4.423318000 | 1.313182000  | 0.087685000  | H  | -0.706703000 | 0.816940000  | -4.516053000 |
| H  | -3.020784000 | 1.935412000  | 1.013184000  | H  | -1.938757000 | 0.429941000  | -3.288671000 |
| H  | -3.032183000 | 2.065603000  | -0.753623000 | H  | -0.970047000 | 1.913702000  | -3.138658000 |
| C  | -3.249161000 | -1.183852000 | 1.344437000  | C  | 0.319487000  | -1.757363000 | -3.204675000 |
| H  | -4.340772000 | -1.206759000 | 1.251018000  | H  | 0.536672000  | -1.700883000 | -4.276555000 |
| H  | -2.855077000 | -2.203636000 | 1.313620000  | H  | 1.082589000  | -2.362705000 | -2.708876000 |
| H  | -2.972731000 | -0.732585000 | 2.301681000  | H  | -0.658920000 | -2.226713000 | -3.064489000 |
| C  | 3.334878000  | 1.439963000  | 0.090451000  | C  | -0.948219000 | 0.865195000  | 3.448844000  |
| H  | 4.423322000  | 1.313195000  | 0.087697000  | H  | -0.706703000 | 0.816940000  | 4.516053000  |
| H  | 3.032190000  | 2.065622000  | -0.753610000 | H  | -0.970047000 | 1.913702000  | 3.138658000  |
| H  | 3.020786000  | 1.935420000  | 1.013196000  | H  | -1.938757000 | 0.429941000  | 3.288671000  |
| C  | 3.220724000  | -0.963039000 | -1.555611000 | C  | 1.934997000  | 0.675257000  | 2.981215000  |
| H  | 4.315704000  | -0.964525000 | -1.509505000 | H  | 2.041483000  | 0.631833000  | 4.070408000  |
| H  | 2.855716000  | -1.990089000 | -1.649073000 | H  | 2.747286000  | 0.116614000  | 2.509351000  |
| H  | 2.886812000  | -0.398317000 | -2.430679000 | H  | 1.986259000  | 1.716965000  | 2.652118000  |
| C  | 3.249170000  | -1.183846000 | 1.344425000  | C  | 0.319487000  | -1.757363000 | 3.204675000  |
| H  | 2.855085000  | -2.203630000 | 1.313603000  | H  | 1.082589000  | -2.362705000 | 2.708876000  |
| H  | 4.340780000  | -1.206753000 | 1.251002000  | H  | 0.536672000  | -1.700883000 | 4.276555000  |
| H  | 2.972744000  | -0.732585000 | 2.301673000  | H  | -0.658920000 | -2.226713000 | 3.064489000  |
| Re | 0.000001000  | -0.181282000 | -0.074584000 | Ru | 0.121995000  | -0.011838000 | 0.000000000  |

**PMe<sub>3</sub>.Ru-N.S<sub>0</sub>**

Energy = -647.595797 a.u.

1 1

|   |              |              |              |
|---|--------------|--------------|--------------|
| C | -2.511907000 | -1.410630000 | 0.000000000  |
| C | -1.818654000 | 0.812699000  | 0.000000000  |
| C | -0.592599000 | 2.755543000  | 0.000000000  |
| C | -1.900604000 | 2.197127000  | 0.000000000  |
| H | -2.821434000 | 2.778715000  | 0.000000000  |
| C | -1.121010000 | -1.533274000 | 0.000000000  |
| C | -2.912065000 | -0.079275000 | 0.000000000  |
| H | -3.951146000 | 0.248753000  | 0.000000000  |
| P | 0.319487000  | -0.062189000 | 2.466808000  |
| P | 0.319487000  | -0.062189000 | -2.466808000 |
| H | -0.636540000 | -2.511255000 | 0.000000000  |

**PMe<sub>3</sub>.Ru-N.T<sub>1</sub>**

Energy = -647.551316 a.u.

1 3

|   |              |              |              |
|---|--------------|--------------|--------------|
| C | 0.000053000  | 1.409759000  | 2.472578000  |
| C | 0.000006000  | 1.842673000  | 0.154014000  |
| C | -0.000074000 | 1.626778000  | -2.189100000 |
| C | 0.000002000  | 2.520243000  | -1.047661000 |
| H | 0.000012000  | 3.606547000  | -1.153573000 |
| C | 0.000002000  | 0.080431000  | 1.984790000  |
| C | 0.000031000  | 2.377041000  | 1.474805000  |
| H | 0.000055000  | 3.447737000  | 1.683138000  |
| P | 2.490079000  | -0.177834000 | -0.078749000 |
| P | -2.490082000 | -0.177830000 | -0.078728000 |
| H | 0.000040000  | -0.744647000 | 2.704581000  |

|    |              |              |              |    |              |              |              |
|----|--------------|--------------|--------------|----|--------------|--------------|--------------|
| H  | 0.000091000  | 1.658043000  | 3.532504000  | H  | 0.000031000  | 1.540327000  | 3.611098000  |
| H  | -0.000035000 | 1.997184000  | -3.219887000 | H  | 0.000009000  | 2.267952000  | -3.079911000 |
| N  | -0.000014000 | 0.357545000  | -1.935887000 | N  | -0.000006000 | 0.687626000  | -1.727807000 |
| Cl | 0.000001000  | -2.592177000 | 0.073613000  | Cl | -0.000012000 | -2.440784000 | 0.172201000  |
| C  | -3.055787000 | -1.096746000 | -1.579087000 | C  | -2.953828000 | -1.299777000 | -1.599562000 |
| H  | -4.150240000 | -1.123316000 | -1.614026000 | H  | -4.043398000 | -1.408426000 | -1.636333000 |
| H  | -2.668945000 | -0.608174000 | -2.476933000 | H  | -2.612601000 | -0.800605000 | -2.510642000 |
| H  | -2.662229000 | -2.115881000 | -1.542325000 | H  | -2.493898000 | -2.288850000 | -1.535795000 |
| C  | -3.363429000 | 1.450860000  | -0.161119000 | C  | -3.431370000 | 1.284644000  | -0.253529000 |
| H  | -4.443584000 | 1.284016000  | -0.231329000 | H  | -4.500994000 | 1.061946000  | -0.335561000 |
| H  | -3.151418000 | 2.038659000  | 0.736246000  | H  | -3.270700000 | 1.903887000  | 0.633123000  |
| H  | -3.032773000 | 2.011372000  | -1.039383000 | H  | -3.124204000 | 1.837531000  | -1.145339000 |
| C  | -3.285015000 | -1.054957000 | 1.343132000  | C  | -3.194725000 | -1.180175000 | 1.347970000  |
| H  | -4.365651000 | -1.131138000 | 1.181247000  | H  | -4.268403000 | -1.332672000 | 1.192596000  |
| H  | -2.858060000 | -2.057527000 | 1.430879000  | H  | -2.709690000 | -2.152280000 | 1.465433000  |
| H  | -3.099975000 | -0.507016000 | 2.271594000  | H  | -3.053447000 | -0.584362000 | 2.254451000  |
| C  | 3.363425000  | 1.450855000  | -0.161152000 | C  | 3.431374000  | 1.284625000  | -0.253523000 |
| H  | 4.443580000  | 1.284011000  | -0.231371000 | H  | 4.500995000  | 1.061921000  | -0.335568000 |
| H  | 3.032763000  | 2.011366000  | -1.039414000 | H  | 3.124200000  | 1.837523000  | -1.145323000 |
| H  | 3.151423000  | 2.038656000  | 0.736214000  | H  | 3.270715000  | 1.903859000  | 0.633138000  |
| C  | 3.055773000  | -1.096757000 | -1.579109000 | C  | 2.953817000  | -1.299790000 | -1.599565000 |
| H  | 4.150226000  | -1.123329000 | -1.614055000 | H  | 4.043387000  | -1.408455000 | -1.636329000 |
| H  | 2.662213000  | -2.115891000 | -1.542341000 | H  | 2.493872000  | -2.288856000 | -1.535806000 |
| H  | 2.668927000  | -0.608188000 | -2.476955000 | H  | 2.612604000  | -0.800607000 | -2.510644000 |
| C  | 3.285021000  | -1.054957000 | 1.343108000  | C  | 3.194715000  | -1.180198000 | 1.347969000  |
| H  | 2.858065000  | -2.057526000 | 1.430862000  | H  | 2.709675000  | -2.152300000 | 1.465431000  |
| H  | 4.365655000  | -1.131138000 | 1.181217000  | H  | 4.268393000  | -1.332701000 | 1.192595000  |
| H  | 3.099986000  | -0.507012000 | 2.271569000  | H  | 3.053442000  | -0.584386000 | 2.254451000  |
| Ru | -0.000001000 | -0.213159000 | 0.030734000  | Ir | -0.000001000 | -0.089790000 | -0.034253000 |

**PMe<sub>3</sub>.Ir-N.S<sub>0</sub>**

Energy = -658.058097 a.u.

2 1

|   |              |              |              |
|---|--------------|--------------|--------------|
| C | 0.000009000  | 1.401534000  | 2.533178000  |
| C | 0.000010000  | 1.985620000  | 0.267706000  |
| C | 0.000008000  | 1.946107000  | -2.038017000 |
| C | 0.000053000  | 2.774614000  | -0.868908000 |
| H | 0.000072000  | 3.862825000  | -0.886464000 |
| C | -0.000006000 | 0.146975000  | 1.929264000  |
| C | -0.000005000 | 2.439168000  | 1.605904000  |
| H | 0.000017000  | 3.495774000  | 1.870427000  |
| P | 2.502040000  | -0.303190000 | -0.116923000 |
| P | -2.502044000 | -0.303174000 | -0.116924000 |
| H | 0.000021000  | -0.769936000 | 2.520081000  |

**PMe<sub>3</sub>.Ir-N.T<sub>1</sub>**

Energy = -658.021234 a.u.

2 3

|   |              |              |              |
|---|--------------|--------------|--------------|
| C | -0.000067000 | 1.439075000  | 2.449103000  |
| C | 0.000008000  | 1.847836000  | 0.122843000  |
| C | 0.000056000  | 1.627191000  | -2.220159000 |
| C | 0.000073000  | 2.526839000  | -1.084069000 |
| H | 0.000092000  | 3.610482000  | -1.194514000 |
| C | -0.000013000 | 0.104912000  | 1.978136000  |
| C | -0.000055000 | 2.397990000  | 1.441774000  |
| H | -0.000057000 | 3.470047000  | 1.635123000  |
| P | 2.509038000  | -0.155940000 | -0.077486000 |
| P | -2.509039000 | -0.155935000 | -0.077515000 |
| H | -0.000026000 | -0.717815000 | 2.699123000  |



|                                          |              |              |              |    |              |              |              |
|------------------------------------------|--------------|--------------|--------------|----|--------------|--------------|--------------|
| H                                        | -0.000094000 | 1.690109000  | 3.507194000  | H  | 0.000042000  | 0.653491000  | -2.547594000 |
| H                                        | 0.000075000  | 1.965313000  | -3.259610000 | H  | 0.000245000  | -1.623586000 | -3.723647000 |
| N                                        | 0.000014000  | 0.365843000  | -1.929442000 | H  | 0.000032000  | -2.592861000 | 2.914287000  |
| Cl                                       | -0.000002000 | -2.530605000 | 0.038579000  | N  | -0.000010000 | -0.942398000 | 1.624026000  |
| C                                        | -3.040184000 | -1.082520000 | -1.578462000 | Cl | -0.000059000 | 2.308004000  | -0.061965000 |
| H                                        | -4.135785000 | -1.088370000 | -1.613996000 | C  | -3.156146000 | 1.366432000  | -1.163456000 |
| H                                        | -2.650242000 | -0.604696000 | -2.480285000 | C  | -3.853432000 | 2.486612000  | -0.687267000 |
| H                                        | -2.670802000 | -2.109798000 | -1.529403000 | C  | -2.924923000 | 1.246267000  | -2.544962000 |
| C                                        | -3.311966000 | 1.497588000  | -0.152985000 | C  | -4.315194000 | 3.461513000  | -1.576642000 |
| H                                        | -4.396590000 | 1.345807000  | -0.204581000 | H  | -4.035378000 | 2.610926000  | 0.374252000  |
| H                                        | -3.083861000 | 2.083199000  | 0.741338000  | C  | -3.392824000 | 2.218184000  | -3.430456000 |
| H                                        | -2.995565000 | 2.045963000  | -1.043583000 | H  | -2.385889000 | 0.391275000  | -2.941055000 |
| C                                        | -3.233984000 | -1.023067000 | 1.379072000  | C  | -4.088886000 | 3.330649000  | -2.947653000 |
| H                                        | -4.319818000 | -1.084978000 | 1.241591000  | H  | -4.849925000 | 4.324942000  | -1.190836000 |
| H                                        | -2.822485000 | -2.032521000 | 1.456485000  | H  | -3.212324000 | 2.106271000  | -4.496247000 |
| H                                        | -3.025605000 | -0.470096000 | 2.299036000  | H  | -4.448995000 | 4.089748000  | -3.636381000 |
| C                                        | 3.311966000  | 1.497583000  | -0.152946000 | C  | -3.178453000 | 0.575868000  | 1.672741000  |
| H                                        | 4.396590000  | 1.345803000  | -0.204533000 | C  | -4.501126000 | 0.255697000  | 2.027440000  |
| H                                        | 2.995571000  | 2.045959000  | -1.043545000 | C  | -2.393637000 | 1.327336000  | 2.561006000  |
| H                                        | 3.083853000  | 2.083192000  | 0.741376000  | C  | -5.022232000 | 0.672716000  | 3.253932000  |
| C                                        | 3.040197000  | -1.082523000 | -1.578430000 | H  | -5.128190000 | -0.317846000 | 1.352252000  |
| H                                        | 4.135799000  | -1.088374000 | -1.613952000 | C  | -2.920762000 | 1.743708000  | 3.786550000  |
| H                                        | 2.670813000  | -2.109800000 | -1.529376000 | H  | -1.380402000 | 1.604981000  | 2.295798000  |
| H                                        | 2.650265000  | -0.604696000 | -2.480256000 | C  | -4.232704000 | 1.415539000  | 4.137043000  |
| C                                        | 3.233967000  | -1.023076000 | 1.379107000  | H  | -6.045302000 | 0.417588000  | 3.516208000  |
| H                                        | 2.822466000  | -2.032530000 | 1.456515000  | H  | -2.304072000 | 2.327261000  | 4.464584000  |
| H                                        | 4.319802000  | -1.084988000 | 1.241638000  | H  | -4.639565000 | 1.738740000  | 5.091307000  |
| H                                        | 3.025579000  | -0.470106000 | 2.299071000  | C  | -3.446439000 | -1.482186000 | -0.370807000 |
| Ir                                       | 0.000000000  | -0.174241000 | 0.028007000  | C  | -4.198239000 | -1.657711000 | -1.541558000 |
| <b>PPh<sub>3</sub>Os-N.S<sub>0</sub></b> |              |              |              |    |              |              |              |
| Energy = -1795.211440 a.u.               |              |              |              |    |              |              |              |
| 1 1                                      |              |              |              |    |              |              |              |
| C                                        | 0.000163000  | -1.515741000 | -2.641773000 | H  | -2.848638000 | -2.404011000 | 1.495895000  |
| C                                        | 0.000029000  | -2.164968000 | -0.408753000 | C  | -4.805486000 | -3.900527000 | -0.846719000 |
| C                                        | 0.000019000  | -2.231783000 | 1.887534000  | H  | -5.452811000 | -2.979377000 | -2.687164000 |
| C                                        | 0.000015000  | -3.004406000 | 0.705012000  | H  | -4.031522000 | -4.521610000 | 1.072453000  |
| H                                        | 0.000021000  | -4.091789000 | 0.675945000  | H  | -5.334819000 | -4.831808000 | -1.028283000 |
| C                                        | 0.000083000  | -0.281104000 | -1.983780000 | C  | 3.156358000  | 1.366931000  | -1.162771000 |
| C                                        | 0.000114000  | -2.585128000 | -1.752030000 | C  | 2.924940000  | 1.247644000  | -2.544322000 |
| H                                        | 0.000137000  | -3.631174000 | -2.052850000 | C  | 3.854040000  | 2.486631000  | -0.686028000 |
| Os                                       | -0.000007000 | -0.102445000 | -0.013462000 | C  | 3.393004000  | 2.219945000  | -3.429302000 |
| P                                        | 2.519929000  | 0.082010000  | 0.012081000  | H  | 2.385639000  | 0.393037000  | -2.940877000 |
| P                                        | -2.519874000 | 0.082008000  | 0.012031000  | C  | 4.315972000  | 3.461924000  | -1.574888000 |

|   |             |              |              |    |              |              |              |
|---|-------------|--------------|--------------|----|--------------|--------------|--------------|
| H | 4.036186000 | 2.610271000  | 0.375535000  | H  | 0.000325000  | -0.045635000 | 3.821323000  |
| C | 4.089441000 | 3.331935000  | -2.945942000 | N  | -0.000206000 | 0.628957000  | 1.842468000  |
| H | 3.212333000 | 2.108709000  | -4.495134000 | Cl | 0.005179000  | 2.236473000  | -1.107301000 |
| H | 4.851015000 | 4.324962000  | -1.188639000 | C  | -3.321935000 | 0.902852000  | -1.472532000 |
| H | 4.449659000 | 4.091338000  | -3.634278000 | C  | -4.572907000 | 1.524450000  | -1.321791000 |
| C | 3.178307000 | 0.575154000  | 1.673094000  | C  | -2.715513000 | 0.885222000  | -2.736929000 |
| C | 4.500559000 | 0.253950000  | 2.028393000  | C  | -5.204347000 | 2.110982000  | -2.421075000 |
| C | 2.393675000 | 1.327252000  | 2.561004000  | H  | -5.057854000 | 1.560334000  | -0.352037000 |
| C | 5.021418000 | 0.670527000  | 3.255150000  | C  | -3.351680000 | 1.470352000  | -3.834139000 |
| H | 5.127501000 | -0.320048000 | 1.353486000  | H  | -1.740544000 | 0.434063000  | -2.871793000 |
| C | 2.920557000 | 1.743194000  | 3.786790000  | C  | -4.597089000 | 2.084429000  | -3.679145000 |
| H | 1.380796000 | 1.605745000  | 2.295299000  | H  | -6.169318000 | 2.592374000  | -2.288865000 |
| C | 4.232074000 | 1.413961000  | 4.137901000  | H  | -2.866946000 | 1.454527000  | -4.806405000 |
| H | 6.044165000 | 0.414589000  | 3.517897000  | H  | -5.087700000 | 2.545741000  | -4.531714000 |
| H | 2.304026000 | 2.327252000  | 4.464533000  | C  | -3.252541000 | 0.941617000  | 1.448123000  |
| H | 4.638745000 | 1.736827000  | 5.092360000  | C  | -4.377884000 | 0.468752000  | 2.142211000  |
| C | 3.446419000 | -1.482060000 | -0.371440000 | C  | -2.694787000 | 2.182684000  | 1.801652000  |
| C | 4.198084000 | -1.657046000 | -1.542364000 | C  | -4.926899000 | 1.220691000  | 3.185684000  |
| C | 3.394547000 | -2.530635000 | 0.565242000  | H  | -4.838549000 | -0.475544000 | 1.872502000  |
| C | 4.869341000 | -2.862171000 | -1.779282000 | C  | -3.253997000 | 2.932275000  | 2.837577000  |
| H | 4.288019000 | -0.855573000 | -2.266425000 | H  | -1.829917000 | 2.566915000  | 1.271232000  |
| C | 4.070305000 | -3.727841000 | 0.329530000  | C  | -4.366745000 | 2.451557000  | 3.535335000  |
| H | 2.848765000 | -2.404760000 | 1.494875000  | H  | -5.796811000 | 0.843799000  | 3.716593000  |
| C | 4.805417000 | -3.900164000 | -0.848619000 | H  | -2.817249000 | 3.891872000  | 3.099962000  |
| H | 5.452520000 | -2.978189000 | -2.688730000 | H  | -4.796948000 | 3.035724000  | 4.344241000  |
| H | 4.031640000 | -4.522159000 | 1.070326000  | C  | -3.298902000 | -1.640377000 | -0.018380000 |
| H | 5.334734000 | -4.831361000 | -1.030664000 | C  | -3.893826000 | -2.153697000 | -1.181455000 |

**PPh<sub>3</sub>Os-N.T<sub>1</sub>**

Energy = -1795.160193 a.u.

1 3

|    |              |              |              |   |              |              |              |
|----|--------------|--------------|--------------|---|--------------|--------------|--------------|
| C  | -0.001300000 | -2.565515000 | -1.306532000 | H | -2.808616000 | -2.064584000 | 2.049089000  |
| C  | 0.001152000  | -1.717390000 | 0.892445000  | C | -4.391341000 | -4.232570000 | -0.037889000 |
| C  | 0.000639000  | -0.301317000 | 2.758979000  | H | -4.895053000 | -3.824411000 | -2.096443000 |
| C  | 0.001765000  | -1.654181000 | 2.281418000  | H | -3.778227000 | -4.328278000 | 2.031307000  |
| H  | 0.002276000  | -2.519382000 | 2.945187000  | H | -4.820227000 | -5.230817000 | -0.043302000 |
| C  | -0.002611000 | -1.182630000 | -1.609160000 | C | 3.318327000  | 0.905971000  | -1.472690000 |
| C  | 0.000739000  | -2.863331000 | 0.052640000  | C | 2.725517000  | 0.856983000  | -2.742892000 |
| H  | 0.001230000  | -3.883339000 | 0.434270000  | C | 4.550061000  | 1.563288000  | -1.317176000 |
| Os | 0.000098000  | 0.096010000  | -0.060555000 | C | 3.356044000  | 1.446521000  | -3.840710000 |
| P  | 2.548018000  | 0.052476000  | -0.015044000 | H | 1.765889000  | 0.374916000  | -2.881940000 |
| P  | -2.547139000 | 0.054239000  | -0.014285000 | C | 5.175801000  | 2.154809000  | -2.417293000 |
| H  | -0.007312000 | -0.919411000 | -2.672719000 | H | 5.024562000  | 1.622987000  | -0.343552000 |
| H  | -0.002520000 | -3.341133000 | -2.069473000 | C | 4.582285000  | 2.097152000  | -3.680674000 |

|   |             |              |              |   |             |              |              |
|---|-------------|--------------|--------------|---|-------------|--------------|--------------|
| H | 2.882203000 | 1.405281000  | -4.817597000 | C | 3.129630000 | -1.433481000 | -1.093396000 |
| H | 6.125795000 | 2.664147000  | -2.281389000 | C | 3.805215000 | -2.546231000 | -0.573658000 |
| H | 5.068478000 | 2.562137000  | -4.533772000 | C | 2.893421000 | -1.373394000 | -2.477125000 |
| C | 3.256077000 | 0.934603000  | 1.449052000  | C | 4.236509000 | -3.574213000 | -1.418202000 |
| C | 4.387217000 | 0.461800000  | 2.133884000  | H | 3.990677000 | -2.624575000 | 0.491916000  |
| C | 2.695735000 | 2.171374000  | 1.813326000  | C | 3.331058000 | -2.396217000 | -3.320358000 |
| C | 4.939078000 | 1.209172000  | 3.179063000  | H | 2.366170000 | -0.524878000 | -2.901766000 |
| H | 4.850075000 | -0.478862000 | 1.855408000  | C | 4.003531000 | -3.502807000 | -2.792672000 |
| C | 3.257815000 | 2.916539000  | 2.850973000  | H | 4.751403000 | -4.432857000 | -0.994654000 |
| H | 1.826682000 | 2.555763000  | 1.290025000  | H | 3.140827000 | -2.329624000 | -4.388818000 |
| C | 4.376107000 | 2.435653000  | 3.539619000  | H | 4.337833000 | -4.303409000 | -3.447697000 |
| H | 5.813366000 | 0.832318000  | 3.702750000  | C | 3.241953000 | -0.478737000 | 1.670299000  |
| H | 2.818913000 | 3.872815000  | 3.121766000  | C | 4.557932000 | -0.116359000 | 2.002077000  |
| H | 4.808491000 | 3.016316000  | 4.349886000  | C | 2.481212000 | -1.203968000 | 2.600480000  |
| C | 3.299305000 | -1.642344000 | -0.024988000 | C | 5.099853000 | -0.467309000 | 3.241374000  |
| C | 3.891884000 | -2.153209000 | -1.190273000 | H | 5.164461000 | 0.443700000  | 1.297227000  |
| C | 3.257808000 | -2.447465000 | 1.127048000  | C | 3.027491000 | -1.557851000 | 3.837576000  |
| C | 4.431474000 | -3.443337000 | -1.202062000 | H | 1.468521000 | -1.502476000 | 2.354553000  |
| H | 3.948104000 | -1.548012000 | -2.088898000 | C | 4.335325000 | -1.188669000 | 4.163097000  |
| C | 3.806516000 | -3.731174000 | 1.114475000  | H | 6.118838000 | -0.175782000 | 3.483856000  |
| H | 2.813298000 | -2.070684000 | 2.042654000  | H | 2.426015000 | -2.121199000 | 4.546576000  |
| C | 4.391485000 | -4.234544000 | -0.052112000 | H | 4.756415000 | -1.460481000 | 5.127959000  |
| H | 4.891419000 | -3.821948000 | -2.110702000 | C | 3.535830000 | 1.410141000  | -0.502736000 |
| H | 3.782401000 | -4.334579000 | 2.018075000  | C | 4.479425000 | 1.377154000  | -1.539473000 |
| H | 4.820292000 | -5.232804000 | -0.060441000 | C | 3.373495000 | 2.602897000  | 0.222728000  |

**PPh<sub>3</sub>.Re-N.S<sub>0</sub>**

Energy = -1783.458862 a.u.

O 1

|    |              |              |              |   |              |              |              |
|----|--------------|--------------|--------------|---|--------------|--------------|--------------|
| C  | 0.000006000  | 1.601138000  | -2.620148000 | C | 5.062680000  | 3.694904000  | -1.127551000 |
| C  | 0.000026000  | 2.230752000  | -0.381851000 | H | 5.957857000  | 2.469052000  | -2.662059000 |
| C  | 0.000040000  | 2.315415000  | 1.917706000  | H | 3.993135000  | 4.645049000  | 0.492059000  |
| C  | 0.000057000  | 3.079594000  | 0.745093000  | H | 5.651126000  | 4.576528000  | -1.369241000 |
| H  | 0.000080000  | 4.169441000  | 0.717458000  | C | -3.129639000 | -1.433540000 | -1.093292000 |
| C  | 0.000002000  | 0.354360000  | -1.972830000 | C | -2.893431000 | -1.373534000 | -2.477024000 |
| C  | 0.000021000  | 2.666505000  | -1.721241000 | C | -3.805253000 | -2.546243000 | -0.573492000 |
| H  | 0.000033000  | 3.714817000  | -2.020804000 | C | -3.331088000 | -2.396396000 | -3.320199000 |
| P  | -2.506675000 | -0.063170000 | 0.006689000  | H | -2.366169000 | -0.525049000 | -2.901714000 |
| P  | 2.506676000  | -0.063176000 | 0.006673000  | C | -4.236568000 | -3.574265000 | -1.417978000 |
| H  | -0.000001000 | -0.562887000 | -2.571461000 | H | -3.990722000 | -2.624520000 | 0.492086000  |
| H  | 0.000003000  | 1.727627000  | -3.702547000 | C | -4.003585000 | -3.502942000 | -2.792452000 |
| H  | 0.000045000  | 2.687963000  | 2.941851000  | H | -3.140855000 | -2.329868000 | -4.388664000 |
| N  | 0.000010000  | 1.004660000  | 1.662490000  | H | -4.751484000 | -4.432871000 | -0.994382000 |
| Cl | 0.000007000  | -2.334461000 | 0.104110000  | H | -4.337902000 | -4.303575000 | -3.447431000 |

|    |              |              |              |   |             |              |              |
|----|--------------|--------------|--------------|---|-------------|--------------|--------------|
| C  | -3.241928000 | -0.478640000 | 1.670348000  | C | 2.815557000 | -1.646895000 | -2.316065000 |
| C  | -4.557850000 | -0.116120000 | 2.002193000  | C | 4.997001000 | -0.271770000 | -3.390058000 |
| C  | -2.481217000 | -1.203952000 | 2.600493000  | H | 4.853367000 | 1.008609000  | -1.670103000 |
| C  | -5.099744000 | -0.467007000 | 3.241520000  | C | 3.387483000 | -2.069080000 | -3.517697000 |
| H  | -5.164356000 | 0.444001000  | 1.297373000  | H | 1.968951000 | -2.187951000 | -1.903025000 |
| C  | -3.027471000 | -1.557774000 | 3.837616000  | C | 4.477524000 | -1.380849000 | -4.061001000 |
| H  | -1.468572000 | -1.502573000 | 2.354512000  | H | 5.845828000 | 0.269019000  | -3.801340000 |
| C  | -4.335249000 | -1.188448000 | 4.163205000  | H | 2.977459000 | -2.935721000 | -4.030254000 |
| H  | -6.118685000 | -0.175367000 | 3.484054000  | H | 4.918313000 | -1.708021000 | -4.999414000 |
| H  | -2.426020000 | -2.121188000 | 4.546586000  | C | 3.292809000 | -1.293770000 | 1.171481000  |
| H  | -4.756318000 | -1.460213000 | 5.128090000  | C | 4.519832000 | -1.915921000 | 0.889777000  |
| C  | -3.535848000 | 1.410099000  | -0.502819000 | C | 2.635081000 | -1.587125000 | 2.376220000  |
| C  | -4.479444000 | 1.377011000  | -1.539552000 | C | 5.082820000 | -2.813437000 | 1.800938000  |
| C  | -3.373554000 | 2.602907000  | 0.222567000  | H | 5.039342000 | -1.709127000 | -0.040610000 |
| C  | -5.233173000 | 2.514424000  | -1.852988000 | C | 3.204860000 | -2.482860000 | 3.285528000  |
| H  | -4.641920000 | 0.466264000  | -2.105128000 | H | 1.682701000 | -1.114283000 | 2.596139000  |
| C  | -4.131996000 | 3.733233000  | -0.084007000 | C | 4.426838000 | -3.098640000 | 3.001808000  |
| H  | -2.653721000 | 2.649294000  | 1.032361000  | H | 6.031301000 | -3.290916000 | 1.567689000  |
| C  | -5.062773000 | 3.694770000  | -1.127786000 | H | 2.684413000 | -2.704684000 | 4.213976000  |
| H  | -5.957908000 | 2.468786000  | -2.662214000 | H | 4.863015000 | -3.800453000 | 3.708504000  |
| H  | -3.993263000 | 4.645056000  | 0.491763000  | C | 3.375716000 | 1.542272000  | 0.446841000  |
| H  | -5.651248000 | 4.576358000  | -1.369536000 | C | 3.171776000 | 2.670406000  | -0.365735000 |
| Re | 0.000005000  | 0.158022000  | 0.024521000  | C | 4.173306000 | 1.664690000  | 1.593457000  |

**PPh<sub>3</sub>.Re-N.T<sub>1</sub>**

Energy = -1783.408454 a.u.

O 3

|    |              |              |              |   |              |              |              |
|----|--------------|--------------|--------------|---|--------------|--------------|--------------|
| C  | -0.153977000 | 1.854004000  | -2.345222000 | C | 4.564908000  | 4.005567000  | 1.099504000  |
| C  | -0.161669000 | 2.113562000  | 0.001454000  | H | 3.605207000  | 4.752528000  | -0.686944000 |
| C  | 0.036757000  | 1.730217000  | 2.295292000  | H | 5.374174000  | 2.971589000  | 2.813055000  |
| C  | -0.157237000 | 2.702289000  | 1.277113000  | H | 5.025314000  | 4.957743000  | 1.351187000  |
| H  | -0.222645000 | 3.773301000  | 1.474269000  | C | -3.241295000 | -1.442016000 | -1.057729000 |
| C  | 0.054581000  | 0.528094000  | -1.995987000 | C | -2.678119000 | -1.698703000 | -2.317286000 |
| C  | -0.272420000 | 2.743542000  | -1.247498000 | C | -4.349312000 | -2.196162000 | -0.643870000 |
| H  | -0.395813000 | 3.820485000  | -1.372095000 | C | -3.221240000 | -2.678608000 | -3.150979000 |
| P  | -2.528823000 | -0.085195000 | 0.006983000  | H | -1.808733000 | -1.137164000 | -2.642268000 |
| P  | 2.551950000  | -0.060238000 | -0.010930000 | C | -4.886967000 | -3.182229000 | -1.476767000 |
| H  | 0.382560000  | -0.167450000 | -2.776872000 | H | -4.795606000 | -2.026687000 | 0.330266000  |
| H  | -0.169430000 | 2.210344000  | -3.376483000 | C | -4.327126000 | -3.424560000 | -2.733248000 |
| H  | 0.088566000  | 1.969665000  | 3.361299000  | H | -2.770676000 | -2.865362000 | -4.122615000 |
| N  | 0.182702000  | 0.494179000  | 1.875220000  | H | -5.741909000 | -3.761718000 | -1.137362000 |
| Cl | -0.014425000 | -2.438959000 | -0.076650000 | H | -4.744046000 | -4.193477000 | -3.378911000 |
| C  | 3.333596000  | -0.531309000 | -1.635422000 | C | -3.262126000 | -0.435668000 | 1.683504000  |
| C  | 4.431774000  | 0.149247000  | -2.181095000 | C | -4.519469000 | 0.054465000  | 2.072666000  |

|    |              |              |              |   |              |              |              |
|----|--------------|--------------|--------------|---|--------------|--------------|--------------|
| C  | -2.555831000 | -1.272910000 | 2.562281000  | H | 2.613719000  | 0.343479000  | -4.033316000 |
| C  | -5.055785000 | -0.278531000 | 3.320074000  | C | 2.144719000  | -3.460488000 | -3.438461000 |
| H  | -5.085501000 | 0.698943000  | 1.407647000  | H | 0.322152000  | -2.948317000 | -2.435561000 |
| C  | -3.098953000 | -1.611053000 | 3.804357000  | C | 3.269875000  | -2.991036000 | -4.122978000 |
| H  | -1.583092000 | -1.660038000 | 2.279407000  | H | 4.302388000  | -1.244469000 | -4.856207000 |
| C  | -4.347033000 | -1.112828000 | 4.188803000  | H | 2.012323000  | -4.525921000 | -3.269882000 |
| H  | -6.028151000 | 0.113563000  | 3.607938000  | H | 4.018261000  | -3.689749000 | -4.486228000 |
| H  | -2.540107000 | -2.260801000 | 4.473035000  | C | 0.591193000  | 1.671608000  | -3.177145000 |
| H  | -4.764186000 | -1.371870000 | 5.158835000  | C | 0.302014000  | 2.028119000  | -4.506956000 |
| C  | -3.453288000 | 1.426969000  | -0.569988000 | C | 1.321305000  | 2.559413000  | -2.372495000 |
| C  | -4.115619000 | 1.457332000  | -1.805210000 | C | 0.730558000  | 3.255408000  | -5.015944000 |
| C  | -3.471486000 | 2.577273000  | 0.236814000  | H | -0.255434000 | 1.353004000  | -5.148698000 |
| C  | -4.782259000 | 2.613617000  | -2.225619000 | C | 1.748389000  | 3.786666000  | -2.887657000 |
| H  | -4.120599000 | 0.582009000  | -2.445672000 | H | 1.576423000  | 2.289472000  | -1.354680000 |
| C  | -4.146759000 | 3.725508000  | -0.178489000 | C | 1.452385000  | 4.138526000  | -4.206631000 |
| H  | -2.954173000 | 2.580092000  | 1.190923000  | H | 0.501093000  | 3.518712000  | -6.044856000 |
| C  | -4.802685000 | 3.749078000  | -1.414031000 | H | 2.315856000  | 4.464504000  | -2.255903000 |
| H  | -5.288439000 | 2.618818000  | -3.187728000 | H | 1.784448000  | 5.093669000  | -4.604254000 |
| H  | -4.155018000 | 4.603836000  | 0.462312000  | C | -1.505632000 | -0.324737000 | -3.450723000 |
| H  | -5.325484000 | 4.645254000  | -1.738845000 | C | -1.735406000 | -1.505137000 | -4.172614000 |
| Re | 0.029069000  | 0.001394000  | 0.005935000  | C | -2.518125000 | 0.652004000  | -3.409148000 |

**PPh<sub>3</sub>.Ru-N.S<sub>0</sub>**

Energy = -1797.993951 a.u.

1 1

|    |              |              |              |   |              |              |              |
|----|--------------|--------------|--------------|---|--------------|--------------|--------------|
| C  | -1.347308000 | -2.721545000 | 0.000000000  | C | -3.732061000 | 0.446539000  | -4.065090000 |
| C  | -2.136493000 | -0.533277000 | 0.000000000  | H | -2.348904000 | 1.590373000  | -2.889986000 |
| C  | -2.330367000 | 1.752362000  | 0.000000000  | C | -3.958307000 | -0.740605000 | -4.770528000 |
| C  | -3.036821000 | 0.519010000  | 0.000000000  | H | -3.113210000 | -2.627357000 | -5.387474000 |
| H  | -4.121458000 | 0.425448000  | 0.000000000  | H | -4.496536000 | 1.218604000  | -4.036103000 |
| C  | -0.164554000 | -1.983867000 | 0.000000000  | H | -4.901872000 | -0.898744000 | -5.285414000 |
| C  | -2.470249000 | -1.900159000 | 0.000000000  | C | 1.332327000  | -1.180089000 | 3.183639000  |
| H  | -3.496931000 | -2.264404000 | 0.000000000  | C | 1.186556000  | -2.561827000 | 2.966790000  |
| P  | 0.073716000  | 0.013307000  | 2.530265000  | C | 2.467199000  | -0.717667000 | 3.866491000  |
| P  | 0.073716000  | 0.013307000  | -2.530265000 | C | 2.144719000  | -3.460488000 | 3.438461000  |
| H  | 0.815380000  | -2.461597000 | 0.000000000  | H | 0.322152000  | -2.948317000 | 2.435561000  |
| H  | -1.382856000 | -3.808687000 | 0.000000000  | C | 3.427910000  | -1.620086000 | 4.332271000  |
| H  | -2.758568000 | 2.754981000  | 0.000000000  | H | 2.613719000  | 0.343479000  | 4.033316000  |
| N  | -1.037778000 | 1.579574000  | 0.000000000  | C | 3.269875000  | -2.991036000 | 4.122978000  |
| Cl | 2.319861000  | -0.010404000 | 0.000000000  | H | 2.012323000  | -4.525921000 | 3.269882000  |
| C  | 1.332327000  | -1.180089000 | -3.183639000 | H | 4.302388000  | -1.244469000 | 4.856207000  |
| C  | 2.467199000  | -0.717667000 | -3.866491000 | H | 4.018261000  | -3.689749000 | 4.486228000  |
| C  | 1.186556000  | -2.561827000 | -2.966790000 | C | 0.591193000  | 1.671608000  | 3.177145000  |
| C  | 3.427910000  | -1.620086000 | -4.332271000 | C | 0.302014000  | 2.028119000  | 4.506956000  |
|    |              |              |              | C | 1.321305000  | 2.559413000  | 2.372495000  |
|    |              |              |              | C | 0.730558000  | 3.255408000  | 5.015944000  |

|    |              |              |             |   |              |              |              |
|----|--------------|--------------|-------------|---|--------------|--------------|--------------|
| H  | -0.255434000 | 1.353004000  | 5.148698000 | H | -1.714228000 | -0.438326000 | 2.875798000  |
| C  | 1.748389000  | 3.786666000  | 2.887657000 | C | -4.697090000 | -1.783671000 | 3.785152000  |
| H  | 1.576423000  | 2.289472000  | 1.354680000 | H | -6.340076000 | -2.176770000 | 2.439299000  |
| C  | 1.452385000  | 4.138526000  | 4.206631000 | H | -2.890582000 | -1.295100000 | 4.860769000  |
| H  | 0.501093000  | 3.518712000  | 6.044856000 | H | -5.210156000 | -2.175493000 | 4.659019000  |
| H  | 2.315856000  | 4.464504000  | 2.255903000 | C | -3.248956000 | -1.038681000 | -1.378521000 |
| H  | 1.784448000  | 5.093669000  | 4.604254000 | C | -4.348541000 | -0.607939000 | -2.138410000 |
| C  | -1.505632000 | -0.324737000 | 3.450723000 | C | -2.704587000 | -2.313655000 | -1.613443000 |
| C  | -1.735406000 | -1.505137000 | 4.172614000 | C | -4.886868000 | -1.437238000 | -3.127513000 |
| C  | -2.518125000 | 0.652004000  | 3.409148000 | H | -4.799949000 | 0.362157000  | -1.960079000 |
| C  | -2.956531000 | -1.710907000 | 4.825033000 | C | -3.253617000 | -3.139671000 | -2.595142000 |
| H  | -0.962625000 | -2.260502000 | 4.256657000 | H | -1.859235000 | -2.665101000 | -1.030603000 |
| C  | -3.732061000 | 0.446539000  | 4.065090000 | C | -4.341236000 | -2.702262000 | -3.358048000 |
| H  | -2.348904000 | 1.590373000  | 2.889986000 | H | -5.738114000 | -1.093430000 | -3.708842000 |
| C  | -3.958307000 | -0.740605000 | 4.770528000 | H | -2.828403000 | -4.125036000 | -2.764425000 |
| H  | -3.113210000 | -2.627357000 | 5.387474000 | H | -4.763549000 | -3.346177000 | -4.124649000 |
| H  | -4.496536000 | 1.218604000  | 4.036103000 | C | -3.288958000 | 1.647061000  | -0.097174000 |
| H  | -4.901872000 | -0.898744000 | 5.285414000 | C | -3.855769000 | 2.254201000  | 1.035172000  |
| Ru | -0.092774000 | -0.017777000 | 0.000000000 | C | -3.250584000 | 2.366299000  | -1.305319000 |

**PPh<sub>3</sub>.Ru-N.T<sub>1</sub>**

Energy = -1797.952746 a.u.

1 3

|    |              |              |              |   |              |              |              |
|----|--------------|--------------|--------------|---|--------------|--------------|--------------|
| C  | -0.000112000 | 2.556615000  | 1.220333000  | C | -4.341223000 | 4.253327000  | -0.247298000 |
| C  | 0.000049000  | 1.613437000  | -0.940093000 | H | -4.816220000 | 4.002031000  | 1.843154000  |
| C  | -0.000126000 | 0.124690000  | -2.757387000 | H | -3.760181000 | 4.190635000  | -2.326854000 |
| C  | -0.000010000 | 1.498494000  | -2.316538000 | H | -4.755315000 | 5.256019000  | -0.307247000 |
| H  | -0.000017000 | 2.340082000  | -3.011416000 | C | 3.364931000  | -0.783084000 | 1.523684000  |
| C  | -0.000285000 | 1.190146000  | 1.571127000  | C | 2.732479000  | -0.790416000 | 2.774353000  |
| C  | 0.000053000  | 2.794056000  | -0.149596000 | C | 4.670633000  | -1.291808000 | 1.413082000  |
| H  | 0.000086000  | 3.796290000  | -0.577692000 | C | 3.396694000  | -1.285852000 | 3.899590000  |
| P  | 2.552664000  | -0.049648000 | 0.022463000  | H | 1.715448000  | -0.434374000 | 2.876357000  |
| P  | -2.552636000 | -0.049765000 | 0.022442000  | C | 5.329994000  | -1.788492000 | 2.539184000  |
| H  | -0.000750000 | 0.947353000  | 2.638710000  | H | 5.176293000  | -1.308807000 | 0.453091000  |
| H  | -0.000191000 | 3.362243000  | 1.952061000  | C | 4.696020000  | -1.785277000 | 3.784991000  |
| H  | -0.000233000 | -0.157701000 | -3.814635000 | H | 2.891178000  | -1.292056000 | 4.861307000  |
| N  | -0.000095000 | -0.772641000 | -1.824050000 | H | 6.337379000  | -2.182821000 | 2.438483000  |
| Cl | 0.000732000  | -2.241211000 | 1.247968000  | H | 5.208785000  | -2.177476000 | 4.658865000  |
| C  | -3.365255000 | -0.782460000 | 1.523860000  | C | 3.248984000  | -1.037990000 | -1.378894000 |
| C  | -4.672084000 | -1.288424000 | 1.413624000  | C | 4.348786000  | -0.607041000 | -2.138359000 |
| C  | -2.732082000 | -0.792065000 | 2.774128000  | C | 2.704412000  | -2.312731000 | -1.614620000 |
| C  | -5.331819000 | -1.784601000 | 2.539705000  | C | 4.887101000  | -1.435881000 | -3.127853000 |
| H  | -5.178315000 | -1.303672000 | 0.453897000  | H | 4.800378000  | 0.362847000  | -1.959374000 |
| C  | -3.396672000 | -1.287055000 | 3.899368000  | C | 3.253434000  | -3.138297000 | -2.596704000 |

|    |              |              |              |   |              |              |              |
|----|--------------|--------------|--------------|---|--------------|--------------|--------------|
| H  | 1.858914000  | -2.664345000 | -1.032098000 | H | 4.799946000  | -4.341440000 | -1.233381000 |
| C  | 4.341252000  | -2.700665000 | -3.359197000 | H | 3.246671000  | -2.040343000 | -4.523566000 |
| H  | 5.738515000  | -1.091916000 | -3.708843000 | H | 4.430346000  | -4.059194000 | -3.677477000 |
| H  | 2.828054000  | -4.123483000 | -2.766611000 | C | 3.156450000  | -0.593060000 | 1.690531000  |
| H  | 4.763557000  | -3.344226000 | -4.126101000 | C | 4.477617000  | -0.277464000 | 2.063040000  |
| C  | 3.289193000  | 1.647158000  | -0.096428000 | C | 2.355921000  | -1.352931000 | 2.559033000  |
| C  | 3.856574000  | 2.253617000  | 1.035994000  | C | 4.980017000  | -0.712011000 | 3.290725000  |
| C  | 3.250573000  | 2.366989000  | -1.304219000 | H | 5.117802000  | 0.298875000  | 1.402898000  |
| C  | 4.376638000  | 3.549215000  | 0.960132000  | C | 2.866439000  | -1.781571000 | 3.786630000  |
| H  | 3.908051000  | 1.716997000  | 1.977607000  | H | 1.346879000  | -1.632441000 | 2.280148000  |
| C  | 3.780465000  | 3.656691000  | -1.379238000 | C | 4.175746000  | -1.460994000 | 4.155416000  |
| H  | 2.822415000  | 1.919010000  | -2.195206000 | H | 6.000921000  | -0.465784000 | 3.567942000  |
| C  | 4.342018000  | 4.253260000  | -0.245682000 | H | 2.241964000  | -2.371759000 | 4.451051000  |
| H  | 4.817742000  | 4.000825000  | 1.844463000  | H | 4.569923000  | -1.796626000 | 5.110256000  |
| H  | 3.760233000  | 4.191691000  | -2.325066000 | C | 3.403396000  | 1.520811000  | -0.325496000 |
| H  | 4.756315000  | 5.255887000  | -0.305294000 | C | 4.057939000  | 1.789448000  | -1.538424000 |
| Ru | -0.000048000 | -0.155435000 | 0.097163000  | C | 3.388681000  | 2.509004000  | 0.678954000  |
|    |              |              |              | C | 4.671352000  | 3.029793000  | -1.747441000 |
|    |              |              |              | H | 4.130794000  | 1.032906000  | -2.310815000 |
|    |              |              |              | C | 4.005699000  | 3.741859000  | 0.465864000  |
|    |              |              |              | H | 2.939122000  | 2.302302000  | 1.645644000  |
|    |              |              |              | C | 4.642536000  | 4.008542000  | -0.752129000 |
|    |              |              |              | H | 5.188746000  | 3.218042000  | -2.683784000 |
|    |              |              |              | H | 4.009258000  | 4.486294000  | 1.257351000  |
|    |              |              |              | H | 5.131536000  | 4.964934000  | -0.913122000 |
|    |              |              |              | C | -3.166162000 | -1.351336000 | -1.180250000 |
|    |              |              |              | C | -2.949895000 | -1.202955000 | -2.563507000 |
|    |              |              |              | C | -3.831669000 | -2.494598000 | -0.708958000 |
|    |              |              |              | C | -3.406667000 | -2.172100000 | -3.456940000 |
|    |              |              |              | H | -2.444727000 | -0.325916000 | -2.957491000 |
|    |              |              |              | C | -4.284287000 | -3.463106000 | -1.609749000 |
|    |              |              |              | H | -4.001959000 | -2.637555000 | 0.352176000  |
|    |              |              |              | C | -4.075274000 | -3.305411000 | -2.980894000 |
|    |              |              |              | H | -3.246702000 | -2.040642000 | -4.523405000 |
|    |              |              |              | H | -4.799973000 | -4.341518000 | -1.233063000 |
|    |              |              |              | H | -4.430380000 | -4.059434000 | -3.677177000 |
|    |              |              |              | C | -3.156413000 | -0.592965000 | 1.690599000  |
|    |              |              |              | C | -4.477526000 | -0.277242000 | 2.063189000  |
|    |              |              |              | C | -2.355902000 | -1.352909000 | 2.559056000  |
|    |              |              |              | C | -4.979890000 | -0.711732000 | 3.290910000  |
|    |              |              |              | H | -5.117700000 | 0.299151000  | 1.403083000  |
|    |              |              |              | C | -2.866384000 | -1.781493000 | 3.786687000  |
|    |              |              |              | H | -1.346906000 | -1.632521000 | 2.280107000  |
|    |              |              |              | C | -4.175636000 | -1.460786000 | 4.155555000  |

**PPh<sub>3</sub>Ir-N.S<sub>0</sub>**

Energy = -1808.490246 a.u.

2 1

|    |              |              |              |
|----|--------------|--------------|--------------|
| C  | -0.000030000 | 1.368088000  | -2.699267000 |
| C  | 0.000004000  | 2.114618000  | -0.486874000 |
| C  | 0.000037000  | 2.241114000  | 1.811619000  |
| C  | 0.000028000  | 2.982697000  | 0.588125000  |
| H  | 0.000038000  | 4.068212000  | 0.524345000  |
| C  | -0.000018000 | 0.160379000  | -2.008955000 |
| C  | -0.000015000 | 2.469878000  | -1.849657000 |
| H  | -0.000018000 | 3.504312000  | -2.188402000 |
| P  | -2.568176000 | -0.088969000 | 0.018750000  |
| P  | 2.568176000  | -0.088965000 | 0.018725000  |
| H  | -0.000016000 | -0.800544000 | -2.521076000 |
| H  | -0.000046000 | 1.432297000  | -3.783980000 |
| H  | 0.000052000  | 2.634507000  | 2.827646000  |
| N  | 0.000022000  | 0.963829000  | 1.592593000  |
| Cl | 0.000011000  | -2.282353000 | -0.088253000 |
| C  | 3.166156000  | -1.351250000 | -1.180367000 |
| C  | 3.831657000  | -2.494548000 | -0.709153000 |
| C  | 2.949880000  | -1.202780000 | -2.563613000 |
| C  | 4.284264000  | -3.463000000 | -1.610008000 |
| H  | 4.001949000  | -2.637576000 | 0.351971000  |
| C  | 3.406642000  | -2.171870000 | -3.457111000 |
| H  | 2.444707000  | -0.325719000 | -2.957539000 |
| C  | 4.075248000  | -3.305215000 | -2.981143000 |

|                                          |              |              |              |   |              |              |              |
|------------------------------------------|--------------|--------------|--------------|---|--------------|--------------|--------------|
| H                                        | -6.000753000 | -0.465406000 | 3.568189000  | H | 4.373231000  | -4.100548000 | -3.645613000 |
| H                                        | -2.241924000 | -2.371740000 | 4.451071000  | C | 3.172264000  | -0.529194000 | 1.669190000  |
| H                                        | -4.569785000 | -1.796375000 | 5.110422000  | C | 4.455761000  | -0.093643000 | 2.063843000  |
| C                                        | -3.403424000 | 1.520768000  | -0.325583000 | C | 2.434389000  | -1.378049000 | 2.514077000  |
| C                                        | -4.058067000 | 1.789260000  | -1.538490000 | C | 4.988294000  | -0.513896000 | 3.281983000  |
| C                                        | -3.388650000 | 2.509071000  | 0.678758000  | H | 5.047952000  | 0.547755000  | 1.420291000  |
| C                                        | -4.671519000 | 3.029571000  | -1.747594000 | C | 2.977369000  | -1.789561000 | 3.731562000  |
| H                                        | -4.130963000 | 1.032633000  | -2.310794000 | H | 1.451986000  | -1.727117000 | 2.220458000  |
| C                                        | -4.005709000 | 3.741889000  | 0.465583000  | C | 4.250070000  | -1.357349000 | 4.120023000  |
| H                                        | -2.939011000 | 2.302483000  | 1.645435000  | H | 5.982505000  | -0.186817000 | 3.572296000  |
| C                                        | -4.642646000 | 4.008427000  | -0.752390000 | H | 2.405017000  | -2.448709000 | 4.377615000  |
| H                                        | -5.188986000 | 3.217710000  | -2.683919000 | H | 4.666562000  | -1.677564000 | 5.070764000  |
| H                                        | -4.009221000 | 4.486411000  | 1.256989000  | C | 3.364443000  | 1.525237000  | -0.410354000 |
| H                                        | -5.131677000 | 4.964793000  | -0.913449000 | C | 4.066728000  | 1.738354000  | -1.611497000 |
| Ir                                       | 0.000003000  | 0.070227000  | -0.034311000 | C | 3.308018000  | 2.564047000  | 0.547390000  |
| <b>PPh<sub>3</sub>Ir-N.T<sub>1</sub></b> |              |              |              | C | 4.694882000  | 2.961912000  | -1.847379000 |
| Energy = -1808.467917 a.u.               |              |              |              | H | 4.164909000  | 0.947351000  | -2.345075000 |
| 2 3                                      |              |              |              | C | 3.944012000  | 3.780193000  | 0.307785000  |
| C                                        | -0.000011000 | 1.491696000  | -2.575897000 | H | 2.801473000  | 2.406822000  | 1.493606000  |
| C                                        | 0.000009000  | 2.066090000  | -0.295642000 | C | 4.632100000  | 3.985927000  | -0.893841000 |
| C                                        | 0.000022000  | 2.009806000  | 2.038979000  | H | 5.253069000  | 3.108338000  | -2.767467000 |
| C                                        | 0.000030000  | 2.832378000  | 0.857292000  | H | 3.913673000  | 4.562761000  | 1.060505000  |
| H                                        | 0.000043000  | 3.920491000  | 0.887583000  | H | 5.131189000  | 4.932569000  | -1.079899000 |
| C                                        | -0.000007000 | 0.198313000  | -2.008670000 | C | -3.125824000 | -1.358173000 | -1.183961000 |
| C                                        | 0.000001000  | 2.522764000  | -1.640815000 | C | -2.901726000 | -1.226755000 | -2.568520000 |
| H                                        | 0.000005000  | 3.577740000  | -1.910391000 | C | -3.784305000 | -2.500778000 | -0.695463000 |
| P                                        | -2.558391000 | -0.072165000 | -0.002520000 | C | -3.358880000 | -2.204423000 | -3.449902000 |
| P                                        | 2.558391000  | -0.072171000 | -0.002514000 | H | -2.381598000 | -0.361538000 | -2.967489000 |
| H                                        | -0.000016000 | -0.675943000 | -2.663615000 | C | -4.234730000 | -3.477909000 | -1.584420000 |
| H                                        | -0.000019000 | 1.669369000  | -3.649173000 | H | -3.956667000 | -2.629492000 | 0.366783000  |
| H                                        | 0.000027000  | 2.407465000  | 3.056706000  | C | -4.024247000 | -3.334554000 | -2.959305000 |
| N                                        | 0.000004000  | 0.727482000  | 1.827458000  | H | -3.194648000 | -2.087963000 | -4.517266000 |
| Cl                                       | -0.000012000 | -2.356016000 | 0.129603000  | H | -4.753381000 | -4.350956000 | -1.199533000 |
| C                                        | 3.125833000  | -1.358310000 | -1.183809000 | H | -4.373182000 | -4.100147000 | -3.646078000 |
| C                                        | 3.784275000  | -2.500878000 | -0.695176000 | C | -3.172250000 | -0.529391000 | 1.669131000  |
| C                                        | 2.901793000  | -1.227020000 | -2.568390000 | C | -4.455724000 | -0.093849000 | 2.063867000  |
| C                                        | 4.234714000  | -3.478106000 | -1.584021000 | C | -2.434392000 | -1.378396000 | 2.513882000  |
| H                                        | 3.956597000  | -2.629492000 | 0.367088000  | C | -4.988250000 | -0.514253000 | 3.281960000  |
| C                                        | 3.358961000  | -2.204784000 | -3.449660000 | H | -5.047903000 | 0.547662000  | 1.420417000  |
| H                                        | 2.381705000  | -0.361829000 | -2.967465000 | C | -2.977363000 | -1.790057000 | 3.731320000  |
| C                                        | 4.024286000  | -3.334881000 | -2.958928000 | H | -1.452009000 | -1.727462000 | 2.220192000  |
| H                                        | 4.753333000  | -4.351125000 | -1.199030000 | C | -4.250040000 | -1.357850000 | 4.119867000  |
| H                                        | 3.194774000  | -2.088423000 | -4.517042000 | H | -5.982442000 | -0.187176000 | 3.572339000  |
|                                          |              |              |              | H | -2.405024000 | -2.449318000 | 4.377269000  |



|    |              |              |              |
|----|--------------|--------------|--------------|
| H  | -4.666526000 | -1.678182000 | 5.070571000  |
| C  | -3.364460000 | 1.525281000  | -0.410180000 |
| C  | -4.066708000 | 1.738539000  | -1.611320000 |
| C  | -3.308108000 | 2.563962000  | 0.547709000  |
| C  | -4.694889000 | 2.962110000  | -1.847062000 |
| H  | -4.164839000 | 0.947631000  | -2.345006000 |
| C  | -3.944129000 | 3.780122000  | 0.308242000  |
| H  | -2.801602000 | 2.406624000  | 1.493926000  |
| C  | -4.632173000 | 3.985998000  | -0.893384000 |
| H  | -5.253045000 | 3.108643000  | -2.767152000 |
| H  | -3.913846000 | 4.562588000  | 1.061070000  |
| H  | -5.131285000 | 4.932650000  | -1.079333000 |
| Ir | -0.000001000 | 0.053951000  | -0.044232000 |
